# Supplementary material for: Optoproteomics elucidates the interactome of L-type amino acid transporter 3 (LAT3)
Source: Royal Society of Chemistry journal article supplement (doi:10.1039/d0cc08423a), 2021-01-01
Supplement: d0cc08423a1.xlsx [file d0cc08423a1.xlsx]

## Sheet: Peptide Report for LAT3-S262+UV
Biological sample	MS/MS Sample name	Protein name	Protein accession numbers	Peptide sequence	Best Peptide identification probability
LAT3-S262+UV	S262+uv1 (F003694)	ADP/ATP translocase 2 OS=Homo sapiens OX=9606 GN=SLC25A5 PE=1 SV=7	ADT2_HUMAN	GMLPDPKNTHIVISWMIAQTVTAVAGLTSYPFDTVR	0.997
LAT3-S262+UV	S262+uv2 (F003695)	ADP/ATP translocase 2 OS=Homo sapiens OX=9606 GN=SLC25A5 PE=1 SV=7	ADT2_HUMAN	GMLPDPKNTHIVISWMIAQTVTAVAGLTSYPFDTVR	0.997
LAT3-S262+UV	S262+UV3 (F003696)	ADP/ATP translocase 2 OS=Homo sapiens OX=9606 GN=SLC25A5 PE=1 SV=7	ADT2_HUMAN	GMLPDPKNTHIVISWMIAQTVTAVAGLTSYPFDTVR	0.997
LAT3-S262+UV	S262+UV3 (F003696)	ADP/ATP translocase 2 OS=Homo sapiens OX=9606 GN=SLC25A5 PE=1 SV=7	ADT2_HUMAN	NTHIVISWMIAQTVTAVAGLTSYPFDTVR	0.997
LAT3-S262+UV	S262+UV4 (F003697)	ADP/ATP translocase 2 OS=Homo sapiens OX=9606 GN=SLC25A5 PE=1 SV=7	ADT2_HUMAN	GMLPDPKNTHIVISWMIAQTVTAVAGLTSYPFDTVR	0.99
LAT3-S262+UV	s262+uv5 (F003698)	ADP/ATP translocase 2 OS=Homo sapiens OX=9606 GN=SLC25A5 PE=1 SV=7	ADT2_HUMAN	GMLPDPKNTHIVISWMIAQTVTAVAGLTSYPFDTVR	0.997
LAT3-S262-UV	S262-UV3 (F003701)	ADP/ATP translocase 2 OS=Homo sapiens OX=9606 GN=SLC25A5 PE=1 SV=7	ADT2_HUMAN	GMLPDPKNTHIVISWMIAQTVTAVAGLTSYPFDTVR	0.997
LAT3-S262+UV	S262+uv1 (F003694)	Rabankyrin-5 OS=Homo sapiens OX=9606 GN=ANKFY1 PE=1 SV=2	ANFY1_HUMAN	GADMSVPDEKGNPPLWLALANNLEDIASTLVR	0.997
LAT3-S262+UV	S262+uv2 (F003695)	Rabankyrin-5 OS=Homo sapiens OX=9606 GN=ANKFY1 PE=1 SV=2	ANFY1_HUMAN	GADMSVPDEKGNPPLWLALANNLEDIASTLVR	0.997
LAT3-S262+UV	S262+UV3 (F003696)	Rabankyrin-5 OS=Homo sapiens OX=9606 GN=ANKFY1 PE=1 SV=2	ANFY1_HUMAN	GADMSVPDEKGNPPLWLALANNLEDIASTLVR	0.997
LAT3-S262+UV	S262+UV4 (F003697)	Rabankyrin-5 OS=Homo sapiens OX=9606 GN=ANKFY1 PE=1 SV=2	ANFY1_HUMAN	GADMSVPDEKGNPPLWLALANNLEDIASTLVR	0.997
LAT3-S262+UV	s262+uv5 (F003698)	Rabankyrin-5 OS=Homo sapiens OX=9606 GN=ANKFY1 PE=1 SV=2	ANFY1_HUMAN	GADMSVPDEKGNPPLWLALANNLEDIASTLVR	0.997
LAT3-S262-UV	S262-UV1 (F003699)	Rabankyrin-5 OS=Homo sapiens OX=9606 GN=ANKFY1 PE=1 SV=2	ANFY1_HUMAN	GADMSVPDEKGNPPLWLALANNLEDIASTLVR	0.997
LAT3-S262-UV	S262-UV2 (F003700)	Rabankyrin-5 OS=Homo sapiens OX=9606 GN=ANKFY1 PE=1 SV=2	ANFY1_HUMAN	GADMSVPDEKGNPPLWLALANNLEDIASTLVR	0.997
LAT3-S262-UV	S262-UV3 (F003701)	Rabankyrin-5 OS=Homo sapiens OX=9606 GN=ANKFY1 PE=1 SV=2	ANFY1_HUMAN	GADMSVPDEKGNPPLWLALANNLEDIASTLVR	0.997
LAT3-S262-UV	S262-UV4 (F003702)	Rabankyrin-5 OS=Homo sapiens OX=9606 GN=ANKFY1 PE=1 SV=2	ANFY1_HUMAN	GADMSVPDEKGNPPLWLALANNLEDIASTLVR	0.997
LAT3-S262-UV	S262-UV5 (F003703)	Rabankyrin-5 OS=Homo sapiens OX=9606 GN=ANKFY1 PE=1 SV=2	ANFY1_HUMAN	GADMSVPDEKGNPPLWLALANNLEDIASTLVR	0.997
LAT3-S262-UV	S262-UV5 (F003703)	Rabankyrin-5 OS=Homo sapiens OX=9606 GN=ANKFY1 PE=1 SV=2	ANFY1_HUMAN	HSADVMSEMAQIAEALLQAGANPNMQDSK	0.997
LAT3-S262+UV	S262+uv1 (F003694)	Cleavage and polyadenylation specificity factor subunit 6 OS=Homo sapiens OX=9606 GN=CPSF6 PE=1 SV=2	CPSF6_HUMAN	AVSDASAGDYGSAIETLVTAISLIK	0.997
LAT3-S262+UV	S262+uv2 (F003695)	Cleavage and polyadenylation specificity factor subunit 6 OS=Homo sapiens OX=9606 GN=CPSF6 PE=1 SV=2	CPSF6_HUMAN	AVSDASAGDYGSAIETLVTAISLIK	0.997
LAT3-S262+UV	S262+UV3 (F003696)	Cleavage and polyadenylation specificity factor subunit 6 OS=Homo sapiens OX=9606 GN=CPSF6 PE=1 SV=2	CPSF6_HUMAN	AVSDASAGDYGSAIETLVTAISLIK	0.997
LAT3-S262+UV	S262+UV4 (F003697)	Cleavage and polyadenylation specificity factor subunit 6 OS=Homo sapiens OX=9606 GN=CPSF6 PE=1 SV=2	CPSF6_HUMAN	AVSDASAGDYGSAIETLVTAISLIK	0.997
LAT3-S262+UV	s262+uv5 (F003698)	Cleavage and polyadenylation specificity factor subunit 6 OS=Homo sapiens OX=9606 GN=CPSF6 PE=1 SV=2	CPSF6_HUMAN	AVSDASAGDYGSAIETLVTAISLIK	0.997
LAT3-S262-UV	S262-UV1 (F003699)	Cleavage and polyadenylation specificity factor subunit 6 OS=Homo sapiens OX=9606 GN=CPSF6 PE=1 SV=2	CPSF6_HUMAN	AVSDASAGDYGSAIETLVTAISLIK	0.997
LAT3-S262-UV	S262-UV1 (F003699)	Cleavage and polyadenylation specificity factor subunit 6 OS=Homo sapiens OX=9606 GN=CPSF6 PE=1 SV=2	CPSF6_HUMAN	AVSDASAGDYGSAIETLVTAISLIKQSK	0.997
LAT3-S262-UV	S262-UV2 (F003700)	Cleavage and polyadenylation specificity factor subunit 6 OS=Homo sapiens OX=9606 GN=CPSF6 PE=1 SV=2	CPSF6_HUMAN	AVSDASAGDYGSAIETLVTAISLIK	0.997
LAT3-S262-UV	S262-UV3 (F003701)	Cleavage and polyadenylation specificity factor subunit 6 OS=Homo sapiens OX=9606 GN=CPSF6 PE=1 SV=2	CPSF6_HUMAN	AVSDASAGDYGSAIETLVTAISLIK	0.997
LAT3-S262-UV	S262-UV4 (F003702)	Cleavage and polyadenylation specificity factor subunit 6 OS=Homo sapiens OX=9606 GN=CPSF6 PE=1 SV=2	CPSF6_HUMAN	AVSDASAGDYGSAIETLVTAISLIK	0.997
LAT3-S262-UV	S262-UV5 (F003703)	Cleavage and polyadenylation specificity factor subunit 6 OS=Homo sapiens OX=9606 GN=CPSF6 PE=1 SV=2	CPSF6_HUMAN	AVSDASAGDYGSAIETLVTAISLIK	0.997
LAT3-S262+UV	S262+uv1 (F003694)	Cleavage and polyadenylation specificity factor subunit 7 OS=Homo sapiens OX=9606 GN=CPSF7 PE=1 SV=1	CPSF7_HUMAN	AVSGASAGDYSDAIETLLTAIAVIK	0.997
LAT3-S262+UV	S262+uv2 (F003695)	Cleavage and polyadenylation specificity factor subunit 7 OS=Homo sapiens OX=9606 GN=CPSF7 PE=1 SV=1	CPSF7_HUMAN	AVSGASAGDYSDAIETLLTAIAVIK	0.997
LAT3-S262+UV	S262+UV3 (F003696)	Cleavage and polyadenylation specificity factor subunit 7 OS=Homo sapiens OX=9606 GN=CPSF7 PE=1 SV=1	CPSF7_HUMAN	AVSGASAGDYSDAIETLLTAIAVIK	0.997
LAT3-S262+UV	S262+UV4 (F003697)	Cleavage and polyadenylation specificity factor subunit 7 OS=Homo sapiens OX=9606 GN=CPSF7 PE=1 SV=1	CPSF7_HUMAN	AVSGASAGDYSDAIETLLTAIAVIK	0.997
LAT3-S262+UV	s262+uv5 (F003698)	Cleavage and polyadenylation specificity factor subunit 7 OS=Homo sapiens OX=9606 GN=CPSF7 PE=1 SV=1	CPSF7_HUMAN	AVSGASAGDYSDAIETLLTAIAVIK	0.997
LAT3-S262-UV	S262-UV1 (F003699)	Cleavage and polyadenylation specificity factor subunit 7 OS=Homo sapiens OX=9606 GN=CPSF7 PE=1 SV=1	CPSF7_HUMAN	AVSGASAGDYSDAIETLLTAIAVIK	0.997
LAT3-S262-UV	S262-UV2 (F003700)	Cleavage and polyadenylation specificity factor subunit 7 OS=Homo sapiens OX=9606 GN=CPSF7 PE=1 SV=1	CPSF7_HUMAN	AVSGASAGDYSDAIETLLTAIAVIK	0.997
LAT3-S262-UV	S262-UV2 (F003700)	Cleavage and polyadenylation specificity factor subunit 7 OS=Homo sapiens OX=9606 GN=CPSF7 PE=1 SV=1	CPSF7_HUMAN	AVSGASAGDYSDAIETLLTAIAVIKQSR	0.997
LAT3-S262-UV	S262-UV3 (F003701)	Cleavage and polyadenylation specificity factor subunit 7 OS=Homo sapiens OX=9606 GN=CPSF7 PE=1 SV=1	CPSF7_HUMAN	AVSGASAGDYSDAIETLLTAIAVIK	0.997
LAT3-S262-UV	S262-UV3 (F003701)	Cleavage and polyadenylation specificity factor subunit 7 OS=Homo sapiens OX=9606 GN=CPSF7 PE=1 SV=1	CPSF7_HUMAN	AVSGASAGDYSDAIETLLTAIAVIKQSR	0.997
LAT3-S262-UV	S262-UV4 (F003702)	Cleavage and polyadenylation specificity factor subunit 7 OS=Homo sapiens OX=9606 GN=CPSF7 PE=1 SV=1	CPSF7_HUMAN	AVSGASAGDYSDAIETLLTAIAVIK	0.997
LAT3-S262-UV	S262-UV5 (F003703)	Cleavage and polyadenylation specificity factor subunit 7 OS=Homo sapiens OX=9606 GN=CPSF7 PE=1 SV=1	CPSF7_HUMAN	AVSGASAGDYSDAIETLLTAIAVIK	0.997
LAT3-S262-UV	S262-UV5 (F003703)	Cleavage and polyadenylation specificity factor subunit 7 OS=Homo sapiens OX=9606 GN=CPSF7 PE=1 SV=1	CPSF7_HUMAN	AVSGASAGDYSDAIETLLTAIAVIKQSR	0.997
LAT3-S262+UV	S262+uv1 (F003694)	ATP-dependent RNA helicase DDX3X OS=Homo sapiens OX=9606 GN=DDX3X PE=1 SV=3	DDX3X_HUMAN	SFLLDLLNATGKDSLTLVFVETK	0.997
LAT3-S262+UV	S262+uv2 (F003695)	ATP-dependent RNA helicase DDX3X OS=Homo sapiens OX=9606 GN=DDX3X PE=1 SV=3	DDX3X_HUMAN	SFLLDLLNATGKDSLTLVFVETK	0.997
LAT3-S262+UV	S262+UV3 (F003696)	ATP-dependent RNA helicase DDX3X OS=Homo sapiens OX=9606 GN=DDX3X PE=1 SV=3	DDX3X_HUMAN	SFLLDLLNATGKDSLTLVFVETK	0.997
LAT3-S262+UV	S262+UV4 (F003697)	ATP-dependent RNA helicase DDX3X OS=Homo sapiens OX=9606 GN=DDX3X PE=1 SV=3	DDX3X_HUMAN	SFLLDLLNATGKDSLTLVFVETK	0.997
LAT3-S262+UV	S262+UV4 (F003697)	ATP-dependent RNA helicase DDX3X OS=Homo sapiens OX=9606 GN=DDX3X PE=1 SV=3	DDX3X_HUMAN	TAAFLLPILSQIYSDGPGEALR	0.997
LAT3-S262+UV	s262+uv5 (F003698)	ATP-dependent RNA helicase DDX3X OS=Homo sapiens OX=9606 GN=DDX3X PE=1 SV=3	DDX3X_HUMAN	DFLDEYIFLAVGR	0.997
LAT3-S262+UV	s262+uv5 (F003698)	ATP-dependent RNA helicase DDX3X OS=Homo sapiens OX=9606 GN=DDX3X PE=1 SV=3	DDX3X_HUMAN	SFLLDLLNATGKDSLTLVFVETK	0.997
LAT3-S262+UV	s262+uv5 (F003698)	ATP-dependent RNA helicase DDX3X OS=Homo sapiens OX=9606 GN=DDX3X PE=1 SV=3	DDX3X_HUMAN	TAAFLLPILSQIYSDGPGEALR	0.997
LAT3-S262-UV	S262-UV1 (F003699)	ATP-dependent RNA helicase DDX3X OS=Homo sapiens OX=9606 GN=DDX3X PE=1 SV=3	DDX3X_HUMAN	SFLLDLLNATGKDSLTLVFVETK	0.997
LAT3-S262-UV	S262-UV1 (F003699)	ATP-dependent RNA helicase DDX3X OS=Homo sapiens OX=9606 GN=DDX3X PE=1 SV=3	DDX3X_HUMAN	TAAFLLPILSQIYSDGPGEALR	0.997
LAT3-S262-UV	S262-UV2 (F003700)	ATP-dependent RNA helicase DDX3X OS=Homo sapiens OX=9606 GN=DDX3X PE=1 SV=3	DDX3X_HUMAN	SFLLDLLNATGKDSLTLVFVETK	0.997
LAT3-S262-UV	S262-UV3 (F003701)	ATP-dependent RNA helicase DDX3X OS=Homo sapiens OX=9606 GN=DDX3X PE=1 SV=3	DDX3X_HUMAN	SFLLDLLNATGKDSLTLVFVETK	0.997
LAT3-S262-UV	S262-UV4 (F003702)	ATP-dependent RNA helicase DDX3X OS=Homo sapiens OX=9606 GN=DDX3X PE=1 SV=3	DDX3X_HUMAN	SFLLDLLNATGKDSLTLVFVETK	0.997
LAT3-S262-UV	S262-UV4 (F003702)	ATP-dependent RNA helicase DDX3X OS=Homo sapiens OX=9606 GN=DDX3X PE=1 SV=3	DDX3X_HUMAN	TAAFLLPILSQIYSDGPGEALR	0.997
LAT3-S262-UV	S262-UV5 (F003703)	ATP-dependent RNA helicase DDX3X OS=Homo sapiens OX=9606 GN=DDX3X PE=1 SV=3	DDX3X_HUMAN	ELAVQIYEEAR	0.997
LAT3-S262-UV	S262-UV5 (F003703)	ATP-dependent RNA helicase DDX3X OS=Homo sapiens OX=9606 GN=DDX3X PE=1 SV=3	DDX3X_HUMAN	SFLLDLLNATGKDSLTLVFVETK	0.997
LAT3-S262-UV	S262-UV5 (F003703)	ATP-dependent RNA helicase DDX3X OS=Homo sapiens OX=9606 GN=DDX3X PE=1 SV=3	DDX3X_HUMAN	TAAFLLPILSQIYSDGPGEALR	0.997
LAT3-S262+UV	S262+UV4 (F003697)	Probable ATP-dependent RNA helicase DDX5 OS=Homo sapiens OX=9606 GN=DDX5 PE=1 SV=1	DDX5_HUMAN	QNFTEPTAIQAQGWPVALSGLDMVGVAQTGSGK	0.997
LAT3-S262+UV	s262+uv5 (F003698)	Probable ATP-dependent RNA helicase DDX5 OS=Homo sapiens OX=9606 GN=DDX5 PE=1 SV=1	DDX5_HUMAN	QNFTEPTAIQAQGWPVALSGLDMVGVAQTGSGK	0.997
LAT3-S262+UV	s262+uv5 (F003698)	Probable ATP-dependent RNA helicase DDX5 OS=Homo sapiens OX=9606 GN=DDX5 PE=1 SV=1	DDX5_HUMAN	TTYLVLDEADRMLDMGFEPQIR	0.964
LAT3-S262+UV	S262+uv1 (F003694)	ATP-dependent RNA helicase A OS=Homo sapiens OX=9606 GN=DHX9 PE=1 SV=4	DHX9_HUMAN	DINTDFLLVVLRDVVQAYPEVR	0.997
LAT3-S262+UV	S262+uv1 (F003694)	ATP-dependent RNA helicase A OS=Homo sapiens OX=9606 GN=DHX9 PE=1 SV=4	DHX9_HUMAN	ELLPVKKFESEILEAISQNSVVIIR	0.997
LAT3-S262+UV	S262+uv1 (F003694)	ATP-dependent RNA helicase A OS=Homo sapiens OX=9606 GN=DHX9 PE=1 SV=4	DHX9_HUMAN	GISHVIVDEIHERDINTDFLLVVLRDVVQAYPEVR	0.997
LAT3-S262+UV	S262+uv1 (F003694)	ATP-dependent RNA helicase A OS=Homo sapiens OX=9606 GN=DHX9 PE=1 SV=4	DHX9_HUMAN	KFESEILEAISQNSVVIIR	0.997
LAT3-S262+UV	S262+uv1 (F003694)	ATP-dependent RNA helicase A OS=Homo sapiens OX=9606 GN=DHX9 PE=1 SV=4	DHX9_HUMAN	QNQVGVVPWSPPQSNWNPWTSSNIDEGPLAFATPEQISMDLK	0.997
LAT3-S262+UV	S262+uv1 (F003694)	ATP-dependent RNA helicase A OS=Homo sapiens OX=9606 GN=DHX9 PE=1 SV=4	DHX9_HUMAN	VILSTNIAETSITINDVVYVIDSCKQK	0.997
LAT3-S262+UV	S262+uv2 (F003695)	ATP-dependent RNA helicase A OS=Homo sapiens OX=9606 GN=DHX9 PE=1 SV=4	DHX9_HUMAN	AAMEALVVEVTKQPAIISQLDPVNER	0.997
LAT3-S262+UV	S262+uv2 (F003695)	ATP-dependent RNA helicase A OS=Homo sapiens OX=9606 GN=DHX9 PE=1 SV=4	DHX9_HUMAN	AIEPPPLDAVIEAEHTLRELDALDANDELTPLGR	0.978
LAT3-S262+UV	S262+uv2 (F003695)	ATP-dependent RNA helicase A OS=Homo sapiens OX=9606 GN=DHX9 PE=1 SV=4	DHX9_HUMAN	DINTDFLLVVLRDVVQAYPEVR	0.997
LAT3-S262+UV	S262+uv2 (F003695)	ATP-dependent RNA helicase A OS=Homo sapiens OX=9606 GN=DHX9 PE=1 SV=4	DHX9_HUMAN	ELLPVKKFESEILEAISQNSVVIIR	0.997
LAT3-S262+UV	S262+uv2 (F003695)	ATP-dependent RNA helicase A OS=Homo sapiens OX=9606 GN=DHX9 PE=1 SV=4	DHX9_HUMAN	FESEILEAISQNSVVIIR	0.997
LAT3-S262+UV	S262+uv2 (F003695)	ATP-dependent RNA helicase A OS=Homo sapiens OX=9606 GN=DHX9 PE=1 SV=4	DHX9_HUMAN	GISHVIVDEIHERDINTDFLLVVLRDVVQAYPEVR	0.997
LAT3-S262+UV	S262+uv2 (F003695)	ATP-dependent RNA helicase A OS=Homo sapiens OX=9606 GN=DHX9 PE=1 SV=4	DHX9_HUMAN	KFESEILEAISQNSVVIIR	0.997
LAT3-S262+UV	S262+uv2 (F003695)	ATP-dependent RNA helicase A OS=Homo sapiens OX=9606 GN=DHX9 PE=1 SV=4	DHX9_HUMAN	QNQVGVVPWSPPQSNWNPWTSSNIDEGPLAFATPEQISMDLK	0.997
LAT3-S262+UV	S262+uv2 (F003695)	ATP-dependent RNA helicase A OS=Homo sapiens OX=9606 GN=DHX9 PE=1 SV=4	DHX9_HUMAN	VFDPVPVGVTKVILSTNIAETSITINDVVYVIDSCKQK	0.997
LAT3-S262+UV	S262+uv2 (F003695)	ATP-dependent RNA helicase A OS=Homo sapiens OX=9606 GN=DHX9 PE=1 SV=4	DHX9_HUMAN	VILSTNIAETSITINDVVYVIDSCKQK	0.997
LAT3-S262+UV	S262+UV3 (F003696)	ATP-dependent RNA helicase A OS=Homo sapiens OX=9606 GN=DHX9 PE=1 SV=4	DHX9_HUMAN	AIEPPPLDAVIEAEHTLRELDALDANDELTPLGR	0.993
LAT3-S262+UV	S262+UV3 (F003696)	ATP-dependent RNA helicase A OS=Homo sapiens OX=9606 GN=DHX9 PE=1 SV=4	DHX9_HUMAN	DINTDFLLVVLRDVVQAYPEVR	0.997
LAT3-S262+UV	S262+UV3 (F003696)	ATP-dependent RNA helicase A OS=Homo sapiens OX=9606 GN=DHX9 PE=1 SV=4	DHX9_HUMAN	ELLPVKKFESEILEAISQNSVVIIR	0.997
LAT3-S262+UV	S262+UV3 (F003696)	ATP-dependent RNA helicase A OS=Homo sapiens OX=9606 GN=DHX9 PE=1 SV=4	DHX9_HUMAN	FESEILEAISQNSVVIIR	0.997
LAT3-S262+UV	S262+UV3 (F003696)	ATP-dependent RNA helicase A OS=Homo sapiens OX=9606 GN=DHX9 PE=1 SV=4	DHX9_HUMAN	GISHVIVDEIHERDINTDFLLVVLRDVVQAYPEVR	0.997
LAT3-S262+UV	S262+UV3 (F003696)	ATP-dependent RNA helicase A OS=Homo sapiens OX=9606 GN=DHX9 PE=1 SV=4	DHX9_HUMAN	KFESEILEAISQNSVVIIR	0.997
LAT3-S262+UV	S262+UV3 (F003696)	ATP-dependent RNA helicase A OS=Homo sapiens OX=9606 GN=DHX9 PE=1 SV=4	DHX9_HUMAN	QNQVGVVPWSPPQSNWNPWTSSNIDEGPLAFATPEQISMDLK	0.997
LAT3-S262+UV	S262+UV3 (F003696)	ATP-dependent RNA helicase A OS=Homo sapiens OX=9606 GN=DHX9 PE=1 SV=4	DHX9_HUMAN	VILSTNIAETSITINDVVYVIDSCK	0.997
LAT3-S262+UV	S262+UV3 (F003696)	ATP-dependent RNA helicase A OS=Homo sapiens OX=9606 GN=DHX9 PE=1 SV=4	DHX9_HUMAN	VILSTNIAETSITINDVVYVIDSCKQK	0.997
LAT3-S262+UV	S262+UV4 (F003697)	ATP-dependent RNA helicase A OS=Homo sapiens OX=9606 GN=DHX9 PE=1 SV=4	DHX9_HUMAN	AAMEALVVEVTKQPAIISQLDPVNER	0.997
LAT3-S262+UV	S262+UV4 (F003697)	ATP-dependent RNA helicase A OS=Homo sapiens OX=9606 GN=DHX9 PE=1 SV=4	DHX9_HUMAN	AIEPPPLDAVIEAEHTLRELDALDANDELTPLGR	0.997
LAT3-S262+UV	S262+UV4 (F003697)	ATP-dependent RNA helicase A OS=Homo sapiens OX=9606 GN=DHX9 PE=1 SV=4	DHX9_HUMAN	DINTDFLLVVLRDVVQAYPEVR	0.997
LAT3-S262+UV	S262+UV4 (F003697)	ATP-dependent RNA helicase A OS=Homo sapiens OX=9606 GN=DHX9 PE=1 SV=4	DHX9_HUMAN	ELLPVKKFESEILEAISQNSVVIIR	0.997
LAT3-S262+UV	S262+UV4 (F003697)	ATP-dependent RNA helicase A OS=Homo sapiens OX=9606 GN=DHX9 PE=1 SV=4	DHX9_HUMAN	ETPFELIEALLK	0.997
LAT3-S262+UV	S262+UV4 (F003697)	ATP-dependent RNA helicase A OS=Homo sapiens OX=9606 GN=DHX9 PE=1 SV=4	DHX9_HUMAN	FESEILEAISQNSVVIIR	0.997
LAT3-S262+UV	S262+UV4 (F003697)	ATP-dependent RNA helicase A OS=Homo sapiens OX=9606 GN=DHX9 PE=1 SV=4	DHX9_HUMAN	FSDHVALLSVFQAWDDAR	0.987
LAT3-S262+UV	S262+UV4 (F003697)	ATP-dependent RNA helicase A OS=Homo sapiens OX=9606 GN=DHX9 PE=1 SV=4	DHX9_HUMAN	GISHVIVDEIHERDINTDFLLVVLRDVVQAYPEVR	0.997
LAT3-S262+UV	S262+UV4 (F003697)	ATP-dependent RNA helicase A OS=Homo sapiens OX=9606 GN=DHX9 PE=1 SV=4	DHX9_HUMAN	GMTLVTPLQLLLFASK	0.997
LAT3-S262+UV	S262+UV4 (F003697)	ATP-dependent RNA helicase A OS=Homo sapiens OX=9606 GN=DHX9 PE=1 SV=4	DHX9_HUMAN	KFESEILEAISQNSVVIIR	0.997
LAT3-S262+UV	S262+UV4 (F003697)	ATP-dependent RNA helicase A OS=Homo sapiens OX=9606 GN=DHX9 PE=1 SV=4	DHX9_HUMAN	KVFDPVPVGVTKVILSTNIAETSITINDVVYVIDSCK	0.997
LAT3-S262+UV	S262+UV4 (F003697)	ATP-dependent RNA helicase A OS=Homo sapiens OX=9606 GN=DHX9 PE=1 SV=4	DHX9_HUMAN	QNQVGVVPWSPPQSNWNPWTSSNIDEGPLAFATPEQISMDLK	0.997
LAT3-S262+UV	S262+UV4 (F003697)	ATP-dependent RNA helicase A OS=Homo sapiens OX=9606 GN=DHX9 PE=1 SV=4	DHX9_HUMAN	VILSTNIAETSITINDVVYVIDSCKQK	0.997
LAT3-S262+UV	s262+uv5 (F003698)	ATP-dependent RNA helicase A OS=Homo sapiens OX=9606 GN=DHX9 PE=1 SV=4	DHX9_HUMAN	AAMEALVVEVTKQPAIISQLDPVNER	0.997
LAT3-S262+UV	s262+uv5 (F003698)	ATP-dependent RNA helicase A OS=Homo sapiens OX=9606 GN=DHX9 PE=1 SV=4	DHX9_HUMAN	AIEPPPLDAVIEAEHTLRELDALDANDELTPLGR	0.997
LAT3-S262+UV	s262+uv5 (F003698)	ATP-dependent RNA helicase A OS=Homo sapiens OX=9606 GN=DHX9 PE=1 SV=4	DHX9_HUMAN	DINTDFLLVVLR	0.997
LAT3-S262+UV	s262+uv5 (F003698)	ATP-dependent RNA helicase A OS=Homo sapiens OX=9606 GN=DHX9 PE=1 SV=4	DHX9_HUMAN	DINTDFLLVVLRDVVQAYPEVR	0.997
LAT3-S262+UV	s262+uv5 (F003698)	ATP-dependent RNA helicase A OS=Homo sapiens OX=9606 GN=DHX9 PE=1 SV=4	DHX9_HUMAN	ELLPVKKFESEILEAISQNSVVIIR	0.997
LAT3-S262+UV	s262+uv5 (F003698)	ATP-dependent RNA helicase A OS=Homo sapiens OX=9606 GN=DHX9 PE=1 SV=4	DHX9_HUMAN	FESEILEAISQNSVVIIR	0.997
LAT3-S262+UV	s262+uv5 (F003698)	ATP-dependent RNA helicase A OS=Homo sapiens OX=9606 GN=DHX9 PE=1 SV=4	DHX9_HUMAN	FSDHVALLSVFQAWDDAR	0.997
LAT3-S262+UV	s262+uv5 (F003698)	ATP-dependent RNA helicase A OS=Homo sapiens OX=9606 GN=DHX9 PE=1 SV=4	DHX9_HUMAN	GISHVIVDEIHERDINTDFLLVVLRDVVQAYPEVR	0.997
LAT3-S262+UV	s262+uv5 (F003698)	ATP-dependent RNA helicase A OS=Homo sapiens OX=9606 GN=DHX9 PE=1 SV=4	DHX9_HUMAN	KFESEILEAISQNSVVIIR	0.997
LAT3-S262+UV	s262+uv5 (F003698)	ATP-dependent RNA helicase A OS=Homo sapiens OX=9606 GN=DHX9 PE=1 SV=4	DHX9_HUMAN	KVFDPVPVGVTKVILSTNIAETSITINDVVYVIDSCK	0.997
LAT3-S262+UV	s262+uv5 (F003698)	ATP-dependent RNA helicase A OS=Homo sapiens OX=9606 GN=DHX9 PE=1 SV=4	DHX9_HUMAN	QNQVGVVPWSPPQSNWNPWTSSNIDEGPLAFATPEQISMDLK	0.997
LAT3-S262+UV	s262+uv5 (F003698)	ATP-dependent RNA helicase A OS=Homo sapiens OX=9606 GN=DHX9 PE=1 SV=4	DHX9_HUMAN	TTQVPQFILDDFIQNDR	0.997
LAT3-S262+UV	s262+uv5 (F003698)	ATP-dependent RNA helicase A OS=Homo sapiens OX=9606 GN=DHX9 PE=1 SV=4	DHX9_HUMAN	VILSTNIAETSITINDVVYVIDSCK	0.997
LAT3-S262+UV	s262+uv5 (F003698)	ATP-dependent RNA helicase A OS=Homo sapiens OX=9606 GN=DHX9 PE=1 SV=4	DHX9_HUMAN	VILSTNIAETSITINDVVYVIDSCKQK	0.997
LAT3-S262-UV	S262-UV1 (F003699)	ATP-dependent RNA helicase A OS=Homo sapiens OX=9606 GN=DHX9 PE=1 SV=4	DHX9_HUMAN	AIEPPPLDAVIEAEHTLRELDALDANDELTPLGR	0.997
LAT3-S262-UV	S262-UV1 (F003699)	ATP-dependent RNA helicase A OS=Homo sapiens OX=9606 GN=DHX9 PE=1 SV=4	DHX9_HUMAN	DINTDFLLVVLRDVVQAYPEVR	0.997
LAT3-S262-UV	S262-UV1 (F003699)	ATP-dependent RNA helicase A OS=Homo sapiens OX=9606 GN=DHX9 PE=1 SV=4	DHX9_HUMAN	ELLPVKKFESEILEAISQNSVVIIR	0.997
LAT3-S262-UV	S262-UV1 (F003699)	ATP-dependent RNA helicase A OS=Homo sapiens OX=9606 GN=DHX9 PE=1 SV=4	DHX9_HUMAN	GMTLVTPLQLLLFASK	0.997
LAT3-S262-UV	S262-UV1 (F003699)	ATP-dependent RNA helicase A OS=Homo sapiens OX=9606 GN=DHX9 PE=1 SV=4	DHX9_HUMAN	KFESEILEAISQNSVVIIR	0.997
LAT3-S262-UV	S262-UV1 (F003699)	ATP-dependent RNA helicase A OS=Homo sapiens OX=9606 GN=DHX9 PE=1 SV=4	DHX9_HUMAN	QNQVGVVPWSPPQSNWNPWTSSNIDEGPLAFATPEQISMDLK	0.997
LAT3-S262-UV	S262-UV2 (F003700)	ATP-dependent RNA helicase A OS=Homo sapiens OX=9606 GN=DHX9 PE=1 SV=4	DHX9_HUMAN	AAMEALVVEVTKQPAIISQLDPVNER	0.994
LAT3-S262-UV	S262-UV2 (F003700)	ATP-dependent RNA helicase A OS=Homo sapiens OX=9606 GN=DHX9 PE=1 SV=4	DHX9_HUMAN	AIEPPPLDAVIEAEHTLRELDALDANDELTPLGR	0.976
LAT3-S262-UV	S262-UV2 (F003700)	ATP-dependent RNA helicase A OS=Homo sapiens OX=9606 GN=DHX9 PE=1 SV=4	DHX9_HUMAN	DINTDFLLVVLRDVVQAYPEVR	0.997
LAT3-S262-UV	S262-UV2 (F003700)	ATP-dependent RNA helicase A OS=Homo sapiens OX=9606 GN=DHX9 PE=1 SV=4	DHX9_HUMAN	KFESEILEAISQNSVVIIR	0.997
LAT3-S262-UV	S262-UV2 (F003700)	ATP-dependent RNA helicase A OS=Homo sapiens OX=9606 GN=DHX9 PE=1 SV=4	DHX9_HUMAN	QNQVGVVPWSPPQSNWNPWTSSNIDEGPLAFATPEQISMDLK	0.997
LAT3-S262-UV	S262-UV3 (F003701)	ATP-dependent RNA helicase A OS=Homo sapiens OX=9606 GN=DHX9 PE=1 SV=4	DHX9_HUMAN	DINTDFLLVVLRDVVQAYPEVR	0.997
LAT3-S262-UV	S262-UV3 (F003701)	ATP-dependent RNA helicase A OS=Homo sapiens OX=9606 GN=DHX9 PE=1 SV=4	DHX9_HUMAN	FESEILEAISQNSVVIIR	0.992
LAT3-S262-UV	S262-UV3 (F003701)	ATP-dependent RNA helicase A OS=Homo sapiens OX=9606 GN=DHX9 PE=1 SV=4	DHX9_HUMAN	KFESEILEAISQNSVVIIR	0.997
LAT3-S262-UV	S262-UV3 (F003701)	ATP-dependent RNA helicase A OS=Homo sapiens OX=9606 GN=DHX9 PE=1 SV=4	DHX9_HUMAN	QNQVGVVPWSPPQSNWNPWTSSNIDEGPLAFATPEQISMDLK	0.997
LAT3-S262-UV	S262-UV4 (F003702)	ATP-dependent RNA helicase A OS=Homo sapiens OX=9606 GN=DHX9 PE=1 SV=4	DHX9_HUMAN	AIEPPPLDAVIEAEHTLRELDALDANDELTPLGR	0.997
LAT3-S262-UV	S262-UV4 (F003702)	ATP-dependent RNA helicase A OS=Homo sapiens OX=9606 GN=DHX9 PE=1 SV=4	DHX9_HUMAN	DINTDFLLVVLRDVVQAYPEVR	0.997
LAT3-S262-UV	S262-UV4 (F003702)	ATP-dependent RNA helicase A OS=Homo sapiens OX=9606 GN=DHX9 PE=1 SV=4	DHX9_HUMAN	ELLPVKKFESEILEAISQNSVVIIR	0.997
LAT3-S262-UV	S262-UV4 (F003702)	ATP-dependent RNA helicase A OS=Homo sapiens OX=9606 GN=DHX9 PE=1 SV=4	DHX9_HUMAN	KFESEILEAISQNSVVIIR	0.997
LAT3-S262-UV	S262-UV4 (F003702)	ATP-dependent RNA helicase A OS=Homo sapiens OX=9606 GN=DHX9 PE=1 SV=4	DHX9_HUMAN	QNQVGVVPWSPPQSNWNPWTSSNIDEGPLAFATPEQISMDLK	0.997
LAT3-S262-UV	S262-UV4 (F003702)	ATP-dependent RNA helicase A OS=Homo sapiens OX=9606 GN=DHX9 PE=1 SV=4	DHX9_HUMAN	VILSTNIAETSITINDVVYVIDSCKQK	0.997
LAT3-S262-UV	S262-UV5 (F003703)	ATP-dependent RNA helicase A OS=Homo sapiens OX=9606 GN=DHX9 PE=1 SV=4	DHX9_HUMAN	AIEPPPLDAVIEAEHTLRELDALDANDELTPLGR	0.995
LAT3-S262-UV	S262-UV5 (F003703)	ATP-dependent RNA helicase A OS=Homo sapiens OX=9606 GN=DHX9 PE=1 SV=4	DHX9_HUMAN	DINTDFLLVVLRDVVQAYPEVR	0.997
LAT3-S262-UV	S262-UV5 (F003703)	ATP-dependent RNA helicase A OS=Homo sapiens OX=9606 GN=DHX9 PE=1 SV=4	DHX9_HUMAN	ELLPVKKFESEILEAISQNSVVIIR	0.997
LAT3-S262-UV	S262-UV5 (F003703)	ATP-dependent RNA helicase A OS=Homo sapiens OX=9606 GN=DHX9 PE=1 SV=4	DHX9_HUMAN	KFESEILEAISQNSVVIIR	0.997
LAT3-S262-UV	S262-UV5 (F003703)	ATP-dependent RNA helicase A OS=Homo sapiens OX=9606 GN=DHX9 PE=1 SV=4	DHX9_HUMAN	VILSTNIAETSITINDVVYVIDSCKQK	0.991
LAT3-S262+UV	S262+uv1 (F003694)	Elongation factor 1-alpha 1 OS=Homo sapiens OX=9606 GN=EEF1A1 PE=1 SV=1	EF1A1_HUMAN,EF1A3_HUMAN	THINIVVIGHVDSGK	0.997
LAT3-S262+UV	S262+uv2 (F003695)	Elongation factor 1-alpha 1 OS=Homo sapiens OX=9606 GN=EEF1A1 PE=1 SV=1	EF1A1_HUMAN,EF1A3_HUMAN	DFIKNMITGTSQADCAVLIVAAGVGEFEAGISK	0.997
LAT3-S262+UV	S262+uv2 (F003695)	Elongation factor 1-alpha 1 OS=Homo sapiens OX=9606 GN=EEF1A1 PE=1 SV=1	EF1A1_HUMAN,EF1A3_HUMAN	THINIVVIGHVDSGK	0.997
LAT3-S262+UV	S262+UV3 (F003696)	Elongation factor 1-alpha 1 OS=Homo sapiens OX=9606 GN=EEF1A1 PE=1 SV=1	EF1A1_HUMAN,EF1A3_HUMAN	DFIKNMITGTSQADCAVLIVAAGVGEFEAGISK	0.997
LAT3-S262+UV	S262+UV3 (F003696)	Elongation factor 1-alpha 1 OS=Homo sapiens OX=9606 GN=EEF1A1 PE=1 SV=1	EF1A1_HUMAN,EF1A3_HUMAN	THINIVVIGHVDSGK	0.997
LAT3-S262+UV	S262+UV4 (F003697)	Elongation factor 1-alpha 1 OS=Homo sapiens OX=9606 GN=EEF1A1 PE=1 SV=1	EF1A1_HUMAN,EF1A3_HUMAN	IGYNPDTVAFVPISGWNGDNMLEPSANMPWFK	0.983
LAT3-S262+UV	S262+UV4 (F003697)	Elongation factor 1-alpha 1 OS=Homo sapiens OX=9606 GN=EEF1A1 PE=1 SV=1	EF1A1_HUMAN,EF1A3_HUMAN	THINIVVIGHVDSGK	0.997
LAT3-S262+UV	s262+uv5 (F003698)	Elongation factor 1-alpha 1 OS=Homo sapiens OX=9606 GN=EEF1A1 PE=1 SV=1	EF1A1_HUMAN,EF1A3_HUMAN	THINIVVIGHVDSGK	0.997
LAT3-S262-UV	S262-UV1 (F003699)	Elongation factor 1-alpha 1 OS=Homo sapiens OX=9606 GN=EEF1A1 PE=1 SV=1	EF1A1_HUMAN,EF1A3_HUMAN	DFIKNMITGTSQADCAVLIVAAGVGEFEAGISK	0.951
LAT3-S262-UV	S262-UV1 (F003699)	Elongation factor 1-alpha 1 OS=Homo sapiens OX=9606 GN=EEF1A1 PE=1 SV=1	EF1A1_HUMAN,EF1A3_HUMAN	THINIVVIGHVDSGK	0.997
LAT3-S262-UV	S262-UV2 (F003700)	Elongation factor 1-alpha 1 OS=Homo sapiens OX=9606 GN=EEF1A1 PE=1 SV=1	EF1A1_HUMAN,EF1A3_HUMAN	DFIKNMITGTSQADCAVLIVAAGVGEFEAGISK	0.997
LAT3-S262-UV	S262-UV3 (F003701)	Elongation factor 1-alpha 1 OS=Homo sapiens OX=9606 GN=EEF1A1 PE=1 SV=1	EF1A1_HUMAN,EF1A3_HUMAN	DFIKNMITGTSQADCAVLIVAAGVGEFEAGISK	0.997
LAT3-S262-UV	S262-UV3 (F003701)	Elongation factor 1-alpha 1 OS=Homo sapiens OX=9606 GN=EEF1A1 PE=1 SV=1	EF1A1_HUMAN,EF1A3_HUMAN	THINIVVIGHVDSGK	0.997
LAT3-S262-UV	S262-UV4 (F003702)	Elongation factor 1-alpha 1 OS=Homo sapiens OX=9606 GN=EEF1A1 PE=1 SV=1	EF1A1_HUMAN,EF1A3_HUMAN	DFIKNMITGTSQADCAVLIVAAGVGEFEAGISK	0.997
LAT3-S262-UV	S262-UV5 (F003703)	Elongation factor 1-alpha 1 OS=Homo sapiens OX=9606 GN=EEF1A1 PE=1 SV=1	EF1A1_HUMAN,EF1A3_HUMAN	DFIKNMITGTSQADCAVLIVAAGVGEFEAGISK	0.997
LAT3-S262-UV	S262-UV2 (F003700)	Eukaryotic translation initiation factor 3 subunit B OS=Homo sapiens OX=9606 GN=EIF3B PE=1 SV=3	EIF3B_HUMAN	GGVDTDELDSNVDDWEEETIEFFVTEEIIPLGNQE	0.993
LAT3-S262-UV	S262-UV2 (F003700)	Eukaryotic translation initiation factor 3 subunit B OS=Homo sapiens OX=9606 GN=EIF3B PE=1 SV=3	EIF3B_HUMAN	YLVTFSPLMDTQDDPQAIIIWDILTGHK	0.997
LAT3-S262-UV	S262-UV3 (F003701)	Eukaryotic translation initiation factor 3 subunit B OS=Homo sapiens OX=9606 GN=EIF3B PE=1 SV=3	EIF3B_HUMAN	YLVTFSPLMDTQDDPQAIIIWDILTGHK	0.997
LAT3-S262-UV	S262-UV4 (F003702)	Eukaryotic translation initiation factor 3 subunit B OS=Homo sapiens OX=9606 GN=EIF3B PE=1 SV=3	EIF3B_HUMAN	GGVDTDELDSNVDDWEEETIEFFVTEEIIPLGNQE	0.997
LAT3-S262+UV	S262+UV3 (F003696)	Eukaryotic translation initiation factor 3 subunit F OS=Homo sapiens OX=9606 GN=EIF3F PE=1 SV=1	EIF3F_HUMAN	IQDALSTVLQYAEDVLSGK	0.99
LAT3-S262+UV	S262+UV4 (F003697)	Eukaryotic translation initiation factor 3 subunit F OS=Homo sapiens OX=9606 GN=EIF3F PE=1 SV=1	EIF3F_HUMAN	IQDALSTVLQYAEDVLSGK	0.997
LAT3-S262+UV	S262+UV4 (F003697)	Eukaryotic translation initiation factor 3 subunit F OS=Homo sapiens OX=9606 GN=EIF3F PE=1 SV=1	EIF3F_HUMAN	IQDALSTVLQYAEDVLSGKVSADNTVGR	0.997
LAT3-S262+UV	s262+uv5 (F003698)	Eukaryotic translation initiation factor 3 subunit F OS=Homo sapiens OX=9606 GN=EIF3F PE=1 SV=1	EIF3F_HUMAN	IQDALSTVLQYAEDVLSGK	0.997
LAT3-S262-UV	S262-UV1 (F003699)	Eukaryotic translation initiation factor 3 subunit F OS=Homo sapiens OX=9606 GN=EIF3F PE=1 SV=1	EIF3F_HUMAN	IQDALSTVLQYAEDVLSGKVSADNTVGR	0.997
LAT3-S262-UV	S262-UV2 (F003700)	Eukaryotic translation initiation factor 3 subunit F OS=Homo sapiens OX=9606 GN=EIF3F PE=1 SV=1	EIF3F_HUMAN	IQDALSTVLQYAEDVLSGK	0.997
LAT3-S262-UV	S262-UV2 (F003700)	Eukaryotic translation initiation factor 3 subunit F OS=Homo sapiens OX=9606 GN=EIF3F PE=1 SV=1	EIF3F_HUMAN	IQDALSTVLQYAEDVLSGKVSADNTVGR	0.997
LAT3-S262-UV	S262-UV3 (F003701)	Eukaryotic translation initiation factor 3 subunit F OS=Homo sapiens OX=9606 GN=EIF3F PE=1 SV=1	EIF3F_HUMAN	IQDALSTVLQYAEDVLSGK	0.997
LAT3-S262-UV	S262-UV4 (F003702)	Eukaryotic translation initiation factor 3 subunit F OS=Homo sapiens OX=9606 GN=EIF3F PE=1 SV=1	EIF3F_HUMAN	IQDALSTVLQYAEDVLSGK	0.997
LAT3-S262-UV	S262-UV4 (F003702)	Eukaryotic translation initiation factor 3 subunit F OS=Homo sapiens OX=9606 GN=EIF3F PE=1 SV=1	EIF3F_HUMAN	IQDALSTVLQYAEDVLSGKVSADNTVGR	0.997
LAT3-S262-UV	S262-UV5 (F003703)	Eukaryotic translation initiation factor 3 subunit F OS=Homo sapiens OX=9606 GN=EIF3F PE=1 SV=1	EIF3F_HUMAN	IQDALSTVLQYAEDVLSGK	0.997
LAT3-S262-UV	S262-UV5 (F003703)	Eukaryotic translation initiation factor 3 subunit F OS=Homo sapiens OX=9606 GN=EIF3F PE=1 SV=1	EIF3F_HUMAN	IQDALSTVLQYAEDVLSGKVSADNTVGR	0.997
LAT3-S262+UV	S262+uv1 (F003694)	RNA-binding protein FUS OS=Homo sapiens OX=9606 GN=FUS PE=1 SV=1	FUS_HUMAN	DQGSRHDSEQDNSDNNTIFVQGLGENVTIESVADYFK	0.997
LAT3-S262+UV	S262+uv1 (F003694)	RNA-binding protein FUS OS=Homo sapiens OX=9606 GN=FUS PE=1 SV=1	FUS_HUMAN	ETGKLKGEATVSFDDPPSAK	0.965
LAT3-S262+UV	S262+uv1 (F003694)	RNA-binding protein FUS OS=Homo sapiens OX=9606 GN=FUS PE=1 SV=1	FUS_HUMAN	HDSEQDNSDNNTIFVQGLGENVTIESVADYFKQIGIIK	0.993
LAT3-S262+UV	S262+uv1 (F003694)	RNA-binding protein FUS OS=Homo sapiens OX=9606 GN=FUS PE=1 SV=1	FUS_HUMAN	LKGEATVSFDDPPSAK	0.997
LAT3-S262+UV	S262+uv2 (F003695)	RNA-binding protein FUS OS=Homo sapiens OX=9606 GN=FUS PE=1 SV=1	FUS_HUMAN	DQGSRHDSEQDNSDNNTIFVQGLGENVTIESVADYFK	0.997
LAT3-S262+UV	S262+uv2 (F003695)	RNA-binding protein FUS OS=Homo sapiens OX=9606 GN=FUS PE=1 SV=1	FUS_HUMAN	LKGEATVSFDDPPSAK	0.997
LAT3-S262+UV	S262+UV3 (F003696)	RNA-binding protein FUS OS=Homo sapiens OX=9606 GN=FUS PE=1 SV=1	FUS_HUMAN	DQGSRHDSEQDNSDNNTIFVQGLGENVTIESVADYFK	0.997
LAT3-S262+UV	S262+UV3 (F003696)	RNA-binding protein FUS OS=Homo sapiens OX=9606 GN=FUS PE=1 SV=1	FUS_HUMAN	ETGKLKGEATVSFDDPPSAK	0.997
LAT3-S262+UV	S262+UV3 (F003696)	RNA-binding protein FUS OS=Homo sapiens OX=9606 GN=FUS PE=1 SV=1	FUS_HUMAN	LKGEATVSFDDPPSAK	0.997
LAT3-S262+UV	S262+UV4 (F003697)	RNA-binding protein FUS OS=Homo sapiens OX=9606 GN=FUS PE=1 SV=1	FUS_HUMAN	DQGSRHDSEQDNSDNNTIFVQGLGENVTIESVADYFK	0.997
LAT3-S262+UV	S262+UV4 (F003697)	RNA-binding protein FUS OS=Homo sapiens OX=9606 GN=FUS PE=1 SV=1	FUS_HUMAN	HDSEQDNSDNNTIFVQGLGENVTIESVADYFKQIGIIK	0.997
LAT3-S262+UV	S262+UV4 (F003697)	RNA-binding protein FUS OS=Homo sapiens OX=9606 GN=FUS PE=1 SV=1	FUS_HUMAN	LKGEATVSFDDPPSAK	0.997
LAT3-S262+UV	s262+uv5 (F003698)	RNA-binding protein FUS OS=Homo sapiens OX=9606 GN=FUS PE=1 SV=1	FUS_HUMAN	DQGSRHDSEQDNSDNNTIFVQGLGENVTIESVADYFK	0.997
LAT3-S262+UV	s262+uv5 (F003698)	RNA-binding protein FUS OS=Homo sapiens OX=9606 GN=FUS PE=1 SV=1	FUS_HUMAN	HDSEQDNSDNNTIFVQGLGENVTIESVADYFK	0.997
LAT3-S262+UV	s262+uv5 (F003698)	RNA-binding protein FUS OS=Homo sapiens OX=9606 GN=FUS PE=1 SV=1	FUS_HUMAN	LKGEATVSFDDPPSAK	0.986
LAT3-S262-UV	S262-UV1 (F003699)	RNA-binding protein FUS OS=Homo sapiens OX=9606 GN=FUS PE=1 SV=1	FUS_HUMAN	DQGSRHDSEQDNSDNNTIFVQGLGENVTIESVADYFKQIGIIK	0.98
LAT3-S262-UV	S262-UV1 (F003699)	RNA-binding protein FUS OS=Homo sapiens OX=9606 GN=FUS PE=1 SV=1	FUS_HUMAN	HDSEQDNSDNNTIFVQGLGENVTIESVADYFKQIGIIK	0.997
LAT3-S262-UV	S262-UV1 (F003699)	RNA-binding protein FUS OS=Homo sapiens OX=9606 GN=FUS PE=1 SV=1	FUS_HUMAN	LKGEATVSFDDPPSAK	0.997
LAT3-S262-UV	S262-UV2 (F003700)	RNA-binding protein FUS OS=Homo sapiens OX=9606 GN=FUS PE=1 SV=1	FUS_HUMAN	DQGSRHDSEQDNSDNNTIFVQGLGENVTIESVADYFK	0.997
LAT3-S262-UV	S262-UV2 (F003700)	RNA-binding protein FUS OS=Homo sapiens OX=9606 GN=FUS PE=1 SV=1	FUS_HUMAN	HDSEQDNSDNNTIFVQGLGENVTIESVADYFK	0.997
LAT3-S262-UV	S262-UV2 (F003700)	RNA-binding protein FUS OS=Homo sapiens OX=9606 GN=FUS PE=1 SV=1	FUS_HUMAN	HDSEQDNSDNNTIFVQGLGENVTIESVADYFKQIGIIK	0.997
LAT3-S262-UV	S262-UV2 (F003700)	RNA-binding protein FUS OS=Homo sapiens OX=9606 GN=FUS PE=1 SV=1	FUS_HUMAN	LKGEATVSFDDPPSAK	0.997
LAT3-S262-UV	S262-UV3 (F003701)	RNA-binding protein FUS OS=Homo sapiens OX=9606 GN=FUS PE=1 SV=1	FUS_HUMAN	DQGSRHDSEQDNSDNNTIFVQGLGENVTIESVADYFK	0.997
LAT3-S262-UV	S262-UV3 (F003701)	RNA-binding protein FUS OS=Homo sapiens OX=9606 GN=FUS PE=1 SV=1	FUS_HUMAN	ETGKLKGEATVSFDDPPSAK	0.952
LAT3-S262-UV	S262-UV3 (F003701)	RNA-binding protein FUS OS=Homo sapiens OX=9606 GN=FUS PE=1 SV=1	FUS_HUMAN	HDSEQDNSDNNTIFVQGLGENVTIESVADYFK	0.997
LAT3-S262-UV	S262-UV3 (F003701)	RNA-binding protein FUS OS=Homo sapiens OX=9606 GN=FUS PE=1 SV=1	FUS_HUMAN	HDSEQDNSDNNTIFVQGLGENVTIESVADYFKQIGIIK	0.997
LAT3-S262-UV	S262-UV3 (F003701)	RNA-binding protein FUS OS=Homo sapiens OX=9606 GN=FUS PE=1 SV=1	FUS_HUMAN	LKGEATVSFDDPPSAK	0.987
LAT3-S262-UV	S262-UV4 (F003702)	RNA-binding protein FUS OS=Homo sapiens OX=9606 GN=FUS PE=1 SV=1	FUS_HUMAN	DQGSRHDSEQDNSDNNTIFVQGLGENVTIESVADYFK	0.997
LAT3-S262-UV	S262-UV4 (F003702)	RNA-binding protein FUS OS=Homo sapiens OX=9606 GN=FUS PE=1 SV=1	FUS_HUMAN	HDSEQDNSDNNTIFVQGLGENVTIESVADYFKQIGIIK	0.997
LAT3-S262-UV	S262-UV4 (F003702)	RNA-binding protein FUS OS=Homo sapiens OX=9606 GN=FUS PE=1 SV=1	FUS_HUMAN	LKGEATVSFDDPPSAK	0.997
LAT3-S262-UV	S262-UV5 (F003703)	RNA-binding protein FUS OS=Homo sapiens OX=9606 GN=FUS PE=1 SV=1	FUS_HUMAN	DQGSRHDSEQDNSDNNTIFVQGLGENVTIESVADYFK	0.997
LAT3-S262-UV	S262-UV5 (F003703)	RNA-binding protein FUS OS=Homo sapiens OX=9606 GN=FUS PE=1 SV=1	FUS_HUMAN	HDSEQDNSDNNTIFVQGLGENVTIESVADYFK	0.997
LAT3-S262-UV	S262-UV5 (F003703)	RNA-binding protein FUS OS=Homo sapiens OX=9606 GN=FUS PE=1 SV=1	FUS_HUMAN	HDSEQDNSDNNTIFVQGLGENVTIESVADYFKQIGIIK	0.997
LAT3-S262-UV	S262-UV5 (F003703)	RNA-binding protein FUS OS=Homo sapiens OX=9606 GN=FUS PE=1 SV=1	FUS_HUMAN	LKGEATVSFDDPPSAK	0.997
LAT3-S262+UV	S262+uv1 (F003694)	Histone H3.2 OS=Homo sapiens OX=9606 GN=HIST2H3A PE=1 SV=3	H32_HUMAN	FQSSAVMALQEASEAYLVGLFEDTNLCAIHAK	0.997
LAT3-S262+UV	S262+uv2 (F003695)	Histone H3.2 OS=Homo sapiens OX=9606 GN=HIST2H3A PE=1 SV=3	H32_HUMAN	FQSSAVMALQEASEAYLVGLFEDTNLCAIHAK	0.997
LAT3-S262+UV	S262+UV3 (F003696)	Histone H3.2 OS=Homo sapiens OX=9606 GN=HIST2H3A PE=1 SV=3	H32_HUMAN	FQSSAVMALQEASEAYLVGLFEDTNLCAIHAK	0.993
LAT3-S262+UV	S262+UV4 (F003697)	Histone H3.2 OS=Homo sapiens OX=9606 GN=HIST2H3A PE=1 SV=3	H32_HUMAN	FQSSAVMALQEASEAYLVGLFEDTNLCAIHAK	0.997
LAT3-S262+UV	s262+uv5 (F003698)	Histone H3.2 OS=Homo sapiens OX=9606 GN=HIST2H3A PE=1 SV=3	H32_HUMAN	FQSSAVMALQEASEAYLVGLFEDTNLCAIHAK	0.997
LAT3-S262-UV	S262-UV3 (F003701)	Histone H3.2 OS=Homo sapiens OX=9606 GN=HIST2H3A PE=1 SV=3	H32_HUMAN	FQSSAVMALQEASEAYLVGLFEDTNLCAIHAK	0.997
LAT3-S262-UV	S262-UV4 (F003702)	Histone H3.2 OS=Homo sapiens OX=9606 GN=HIST2H3A PE=1 SV=3	H32_HUMAN	FQSSAVMALQEASEAYLVGLFEDTNLCAIHAK	0.997
LAT3-S262-UV	S262-UV4 (F003702)	Histone H3.2 OS=Homo sapiens OX=9606 GN=HIST2H3A PE=1 SV=3	H32_HUMAN	FQSSAVMALQEASEAYLVGLFEDTNLCAIHAKR	0.997
LAT3-S262+UV	S262+uv1 (F003694)	Heterogeneous nuclear ribonucleoprotein H OS=Homo sapiens OX=9606 GN=HNRNPH1 PE=1 SV=4	HNRH1_HUMAN	EGRPSGEAFVELESEDEVK	0.997
LAT3-S262+UV	S262+uv1 (F003694)	Heterogeneous nuclear ribonucleoprotein H OS=Homo sapiens OX=9606 GN=HNRNPH1 PE=1 SV=4	HNRH1_HUMAN	EGRPSGEAFVELESEDEVKLALKK	0.997
LAT3-S262+UV	S262+uv1 (F003694)	Heterogeneous nuclear ribonucleoprotein H OS=Homo sapiens OX=9606 GN=HNRNPH1 PE=1 SV=4	HNRH1_HUMAN	GLPFGCSKEEIVQFFSGLEIVPNGITLPVDFQGR	0.997
LAT3-S262+UV	S262+uv1 (F003694)	Heterogeneous nuclear ribonucleoprotein H OS=Homo sapiens OX=9606 GN=HNRNPH1 PE=1 SV=4	HNRH1_HUMAN	LRGLPFGCSKEEIVQFFSGLEIVPNGITLPVDFQGR	0.997
LAT3-S262+UV	S262+uv1 (F003694)	Heterogeneous nuclear ribonucleoprotein H OS=Homo sapiens OX=9606 GN=HNRNPH1 PE=1 SV=4	HNRH1_HUMAN	STGEAFVQFASQEIAEK	0.997
LAT3-S262+UV	S262+uv1 (F003694)	Heterogeneous nuclear ribonucleoprotein H OS=Homo sapiens OX=9606 GN=HNRNPH1 PE=1 SV=4	HNRH1_HUMAN	YVELFLNSTAGASGGAYEHR	0.997
LAT3-S262+UV	S262+uv2 (F003695)	Heterogeneous nuclear ribonucleoprotein H OS=Homo sapiens OX=9606 GN=HNRNPH1 PE=1 SV=4	HNRH1_HUMAN	EGRPSGEAFVELESEDEVK	0.997
LAT3-S262+UV	S262+uv2 (F003695)	Heterogeneous nuclear ribonucleoprotein H OS=Homo sapiens OX=9606 GN=HNRNPH1 PE=1 SV=4	HNRH1_HUMAN	EGRPSGEAFVELESEDEVKLALKK	0.997
LAT3-S262+UV	S262+uv2 (F003695)	Heterogeneous nuclear ribonucleoprotein H OS=Homo sapiens OX=9606 GN=HNRNPH1 PE=1 SV=4	HNRH1_HUMAN	GLPFGCSKEEIVQFFSGLEIVPNGITLPVDFQGR	0.997
LAT3-S262+UV	S262+uv2 (F003695)	Heterogeneous nuclear ribonucleoprotein H OS=Homo sapiens OX=9606 GN=HNRNPH1 PE=1 SV=4	HNRH1_HUMAN	LRGLPFGCSKEEIVQFFSGLEIVPNGITLPVDFQGR	0.997
LAT3-S262+UV	S262+uv2 (F003695)	Heterogeneous nuclear ribonucleoprotein H OS=Homo sapiens OX=9606 GN=HNRNPH1 PE=1 SV=4	HNRH1_HUMAN	STGEAFVQFASQEIAEK	0.997
LAT3-S262+UV	S262+uv2 (F003695)	Heterogeneous nuclear ribonucleoprotein H OS=Homo sapiens OX=9606 GN=HNRNPH1 PE=1 SV=4	HNRH1_HUMAN	YVELFLNSTAGASGGAYEHR	0.997
LAT3-S262+UV	S262+UV3 (F003696)	Heterogeneous nuclear ribonucleoprotein H OS=Homo sapiens OX=9606 GN=HNRNPH1 PE=1 SV=4	HNRH1_HUMAN	EGRPSGEAFVELESEDEVK	0.997
LAT3-S262+UV	S262+UV3 (F003696)	Heterogeneous nuclear ribonucleoprotein H OS=Homo sapiens OX=9606 GN=HNRNPH1 PE=1 SV=4	HNRH1_HUMAN	EGRPSGEAFVELESEDEVKLALKK	0.997
LAT3-S262+UV	S262+UV3 (F003696)	Heterogeneous nuclear ribonucleoprotein H OS=Homo sapiens OX=9606 GN=HNRNPH1 PE=1 SV=4	HNRH1_HUMAN	GLPFGCSKEEIVQFFSGLEIVPNGITLPVDFQGR	0.997
LAT3-S262+UV	S262+UV3 (F003696)	Heterogeneous nuclear ribonucleoprotein H OS=Homo sapiens OX=9606 GN=HNRNPH1 PE=1 SV=4	HNRH1_HUMAN	LRGLPFGCSKEEIVQFFSGLEIVPNGITLPVDFQGR	0.997
LAT3-S262+UV	S262+UV3 (F003696)	Heterogeneous nuclear ribonucleoprotein H OS=Homo sapiens OX=9606 GN=HNRNPH1 PE=1 SV=4	HNRH1_HUMAN	STGEAFVQFASQEIAEK	0.997
LAT3-S262+UV	S262+UV3 (F003696)	Heterogeneous nuclear ribonucleoprotein H OS=Homo sapiens OX=9606 GN=HNRNPH1 PE=1 SV=4	HNRH1_HUMAN	YVELFLNSTAGASGGAYEHR	0.997
LAT3-S262+UV	S262+UV4 (F003697)	Heterogeneous nuclear ribonucleoprotein H OS=Homo sapiens OX=9606 GN=HNRNPH1 PE=1 SV=4	HNRH1_HUMAN	EGRPSGEAFVELESEDEVK	0.997
LAT3-S262+UV	S262+UV4 (F003697)	Heterogeneous nuclear ribonucleoprotein H OS=Homo sapiens OX=9606 GN=HNRNPH1 PE=1 SV=4	HNRH1_HUMAN	EGRPSGEAFVELESEDEVKLALKK	0.997
LAT3-S262+UV	S262+UV4 (F003697)	Heterogeneous nuclear ribonucleoprotein H OS=Homo sapiens OX=9606 GN=HNRNPH1 PE=1 SV=4	HNRH1_HUMAN	GLPFGCSKEEIVQFFSGLEIVPNGITLPVDFQGR	0.997
LAT3-S262+UV	S262+UV4 (F003697)	Heterogeneous nuclear ribonucleoprotein H OS=Homo sapiens OX=9606 GN=HNRNPH1 PE=1 SV=4	HNRH1_HUMAN	LRGLPFGCSKEEIVQFFSGLEIVPNGITLPVDFQGR	0.997
LAT3-S262+UV	S262+UV4 (F003697)	Heterogeneous nuclear ribonucleoprotein H OS=Homo sapiens OX=9606 GN=HNRNPH1 PE=1 SV=4	HNRH1_HUMAN	STGEAFVQFASQ	0.958
LAT3-S262+UV	S262+UV4 (F003697)	Heterogeneous nuclear ribonucleoprotein H OS=Homo sapiens OX=9606 GN=HNRNPH1 PE=1 SV=4	HNRH1_HUMAN	STGEAFVQFASQEIAEK	0.997
LAT3-S262+UV	S262+UV4 (F003697)	Heterogeneous nuclear ribonucleoprotein H OS=Homo sapiens OX=9606 GN=HNRNPH1 PE=1 SV=4	HNRH1_HUMAN	YVELFLNSTAGASGGAYEHR	0.997
LAT3-S262+UV	s262+uv5 (F003698)	Heterogeneous nuclear ribonucleoprotein H OS=Homo sapiens OX=9606 GN=HNRNPH1 PE=1 SV=4	HNRH1_HUMAN	EGRPSGEAFVELESEDEVK	0.997
LAT3-S262+UV	s262+uv5 (F003698)	Heterogeneous nuclear ribonucleoprotein H OS=Homo sapiens OX=9606 GN=HNRNPH1 PE=1 SV=4	HNRH1_HUMAN	EGRPSGEAFVELESEDEVKLALKK	0.997
LAT3-S262+UV	s262+uv5 (F003698)	Heterogeneous nuclear ribonucleoprotein H OS=Homo sapiens OX=9606 GN=HNRNPH1 PE=1 SV=4	HNRH1_HUMAN	GLPFGCSKEEIVQFFSGLEIVPNGITLPVDFQGR	0.997
LAT3-S262+UV	s262+uv5 (F003698)	Heterogeneous nuclear ribonucleoprotein H OS=Homo sapiens OX=9606 GN=HNRNPH1 PE=1 SV=4	HNRH1_HUMAN	LRGLPFGCSKEEIVQFFSGLEIVPNGITLPVDFQGR	0.997
LAT3-S262+UV	s262+uv5 (F003698)	Heterogeneous nuclear ribonucleoprotein H OS=Homo sapiens OX=9606 GN=HNRNPH1 PE=1 SV=4	HNRH1_HUMAN	STGEAFVQFASQEIAEK	0.997
LAT3-S262+UV	s262+uv5 (F003698)	Heterogeneous nuclear ribonucleoprotein H OS=Homo sapiens OX=9606 GN=HNRNPH1 PE=1 SV=4	HNRH1_HUMAN	YVELFLNSTAGASGGAYEHR	0.997
LAT3-S262-UV	S262-UV1 (F003699)	Heterogeneous nuclear ribonucleoprotein H OS=Homo sapiens OX=9606 GN=HNRNPH1 PE=1 SV=4	HNRH1_HUMAN	EGRPSGEAFVELESEDEVK	0.996
LAT3-S262-UV	S262-UV1 (F003699)	Heterogeneous nuclear ribonucleoprotein H OS=Homo sapiens OX=9606 GN=HNRNPH1 PE=1 SV=4	HNRH1_HUMAN	EGRPSGEAFVELESEDEVKLALKK	0.996
LAT3-S262-UV	S262-UV1 (F003699)	Heterogeneous nuclear ribonucleoprotein H OS=Homo sapiens OX=9606 GN=HNRNPH1 PE=1 SV=4	HNRH1_HUMAN	GLPFGCSKEEIVQFFSGLEIVPNGITLPVDFQGR	0.997
LAT3-S262-UV	S262-UV1 (F003699)	Heterogeneous nuclear ribonucleoprotein H OS=Homo sapiens OX=9606 GN=HNRNPH1 PE=1 SV=4	HNRH1_HUMAN	LRGLPFGCSKEEIVQFFSGLEIVPNGITLPVDFQGR	0.997
LAT3-S262-UV	S262-UV1 (F003699)	Heterogeneous nuclear ribonucleoprotein H OS=Homo sapiens OX=9606 GN=HNRNPH1 PE=1 SV=4	HNRH1_HUMAN	STGEAFVQFASQEIAEK	0.997
LAT3-S262-UV	S262-UV1 (F003699)	Heterogeneous nuclear ribonucleoprotein H OS=Homo sapiens OX=9606 GN=HNRNPH1 PE=1 SV=4	HNRH1_HUMAN	YVELFLNSTAGASGGAYEHR	0.997
LAT3-S262-UV	S262-UV2 (F003700)	Heterogeneous nuclear ribonucleoprotein H OS=Homo sapiens OX=9606 GN=HNRNPH1 PE=1 SV=4	HNRH1_HUMAN	EGRPSGEAFVELESEDEVK	0.997
LAT3-S262-UV	S262-UV2 (F003700)	Heterogeneous nuclear ribonucleoprotein H OS=Homo sapiens OX=9606 GN=HNRNPH1 PE=1 SV=4	HNRH1_HUMAN	GLPFGCSKEEIVQFFSGLEIVPNGITLPVDFQGR	0.997
LAT3-S262-UV	S262-UV2 (F003700)	Heterogeneous nuclear ribonucleoprotein H OS=Homo sapiens OX=9606 GN=HNRNPH1 PE=1 SV=4	HNRH1_HUMAN	LRGLPFGCSKEEIVQFFSGLEIVPNGITLPVDFQGR	0.997
LAT3-S262-UV	S262-UV2 (F003700)	Heterogeneous nuclear ribonucleoprotein H OS=Homo sapiens OX=9606 GN=HNRNPH1 PE=1 SV=4	HNRH1_HUMAN	STGEAFVQFASQEIAEK	0.997
LAT3-S262-UV	S262-UV2 (F003700)	Heterogeneous nuclear ribonucleoprotein H OS=Homo sapiens OX=9606 GN=HNRNPH1 PE=1 SV=4	HNRH1_HUMAN	YVELFLNSTAGASGGAYEHR	0.997
LAT3-S262-UV	S262-UV3 (F003701)	Heterogeneous nuclear ribonucleoprotein H OS=Homo sapiens OX=9606 GN=HNRNPH1 PE=1 SV=4	HNRH1_HUMAN	EGRPSGEAFVELESEDEVK	0.997
LAT3-S262-UV	S262-UV3 (F003701)	Heterogeneous nuclear ribonucleoprotein H OS=Homo sapiens OX=9606 GN=HNRNPH1 PE=1 SV=4	HNRH1_HUMAN	EGRPSGEAFVELESEDEVKLALKK	0.997
LAT3-S262-UV	S262-UV3 (F003701)	Heterogeneous nuclear ribonucleoprotein H OS=Homo sapiens OX=9606 GN=HNRNPH1 PE=1 SV=4	HNRH1_HUMAN	GLPFGCSKEEIVQFFSGLEIVPNGITLPVDFQGR	0.997
LAT3-S262-UV	S262-UV3 (F003701)	Heterogeneous nuclear ribonucleoprotein H OS=Homo sapiens OX=9606 GN=HNRNPH1 PE=1 SV=4	HNRH1_HUMAN	LRGLPFGCSKEEIVQFFSGLEIVPNGITLPVDFQGR	0.997
LAT3-S262-UV	S262-UV3 (F003701)	Heterogeneous nuclear ribonucleoprotein H OS=Homo sapiens OX=9606 GN=HNRNPH1 PE=1 SV=4	HNRH1_HUMAN	STGEAFVQFASQEIAEK	0.977
LAT3-S262-UV	S262-UV3 (F003701)	Heterogeneous nuclear ribonucleoprotein H OS=Homo sapiens OX=9606 GN=HNRNPH1 PE=1 SV=4	HNRH1_HUMAN	YVELFLNSTAGASGGAYEHR	0.997
LAT3-S262-UV	S262-UV4 (F003702)	Heterogeneous nuclear ribonucleoprotein H OS=Homo sapiens OX=9606 GN=HNRNPH1 PE=1 SV=4	HNRH1_HUMAN	EGRPSGEAFVELESEDEVK	0.997
LAT3-S262-UV	S262-UV4 (F003702)	Heterogeneous nuclear ribonucleoprotein H OS=Homo sapiens OX=9606 GN=HNRNPH1 PE=1 SV=4	HNRH1_HUMAN	GLPFGCSKEEIVQFFSGLEIVPNGITLPVDFQGR	0.997
LAT3-S262-UV	S262-UV4 (F003702)	Heterogeneous nuclear ribonucleoprotein H OS=Homo sapiens OX=9606 GN=HNRNPH1 PE=1 SV=4	HNRH1_HUMAN	LRGLPFGCSKEEIVQFFSGLEIVPNGITLPVDFQGR	0.997
LAT3-S262-UV	S262-UV4 (F003702)	Heterogeneous nuclear ribonucleoprotein H OS=Homo sapiens OX=9606 GN=HNRNPH1 PE=1 SV=4	HNRH1_HUMAN	STGEAFVQFASQEIAEK	0.997
LAT3-S262-UV	S262-UV4 (F003702)	Heterogeneous nuclear ribonucleoprotein H OS=Homo sapiens OX=9606 GN=HNRNPH1 PE=1 SV=4	HNRH1_HUMAN	YVELFLNSTAGASGGAYEHR	0.997
LAT3-S262-UV	S262-UV5 (F003703)	Heterogeneous nuclear ribonucleoprotein H OS=Homo sapiens OX=9606 GN=HNRNPH1 PE=1 SV=4	HNRH1_HUMAN	EGRPSGEAFVELESEDEVK	0.997
LAT3-S262-UV	S262-UV5 (F003703)	Heterogeneous nuclear ribonucleoprotein H OS=Homo sapiens OX=9606 GN=HNRNPH1 PE=1 SV=4	HNRH1_HUMAN	EGRPSGEAFVELESEDEVKL	0.997
LAT3-S262-UV	S262-UV5 (F003703)	Heterogeneous nuclear ribonucleoprotein H OS=Homo sapiens OX=9606 GN=HNRNPH1 PE=1 SV=4	HNRH1_HUMAN	GLPFGCSKEEIVQFFSGLEIVPNGITLPVDFQGR	0.997
LAT3-S262-UV	S262-UV5 (F003703)	Heterogeneous nuclear ribonucleoprotein H OS=Homo sapiens OX=9606 GN=HNRNPH1 PE=1 SV=4	HNRH1_HUMAN	LRGLPFGCSKEEIVQFFSGLEIVPNGITLPVDFQGR	0.997
LAT3-S262-UV	S262-UV5 (F003703)	Heterogeneous nuclear ribonucleoprotein H OS=Homo sapiens OX=9606 GN=HNRNPH1 PE=1 SV=4	HNRH1_HUMAN	STGEAFVQFASQEIAEK	0.997
LAT3-S262-UV	S262-UV5 (F003703)	Heterogeneous nuclear ribonucleoprotein H OS=Homo sapiens OX=9606 GN=HNRNPH1 PE=1 SV=4	HNRH1_HUMAN	YVELFLNSTAGASGGAYEHR	0.997
LAT3-S262+UV	S262+uv1 (F003694)	Heterogeneous nuclear ribonucleoprotein H2 OS=Homo sapiens OX=9606 GN=HNRNPH2 PE=1 SV=1	HNRH2_HUMAN	STGEAFVQFASQEIAEK	0.997
LAT3-S262+UV	S262+uv2 (F003695)	Heterogeneous nuclear ribonucleoprotein H2 OS=Homo sapiens OX=9606 GN=HNRNPH2 PE=1 SV=1	HNRH2_HUMAN	GLPFGCSKEEIVQFFSGLEIVPNGMTLPVDFQGR	0.978
LAT3-S262+UV	S262+uv2 (F003695)	Heterogeneous nuclear ribonucleoprotein H2 OS=Homo sapiens OX=9606 GN=HNRNPH2 PE=1 SV=1	HNRH2_HUMAN	STGEAFVQFASQEIAEK	0.997
LAT3-S262+UV	S262+UV4 (F003697)	Heterogeneous nuclear ribonucleoprotein H2 OS=Homo sapiens OX=9606 GN=HNRNPH2 PE=1 SV=1	HNRH2_HUMAN	GLPFGCSKEEIVQFFSGLEIVPNGMTLPVDFQGR	0.997
LAT3-S262+UV	S262+UV4 (F003697)	Heterogeneous nuclear ribonucleoprotein H2 OS=Homo sapiens OX=9606 GN=HNRNPH2 PE=1 SV=1	HNRH2_HUMAN	LRGLPFGCSKEEIVQFFSGLEIVPNGMTLPVDFQGR	0.997
LAT3-S262+UV	S262+UV4 (F003697)	Heterogeneous nuclear ribonucleoprotein H2 OS=Homo sapiens OX=9606 GN=HNRNPH2 PE=1 SV=1	HNRH2_HUMAN	STGEAFVQFASQ	0.958
LAT3-S262+UV	S262+UV4 (F003697)	Heterogeneous nuclear ribonucleoprotein H2 OS=Homo sapiens OX=9606 GN=HNRNPH2 PE=1 SV=1	HNRH2_HUMAN	STGEAFVQFASQEIAEK	0.997
LAT3-S262+UV	s262+uv5 (F003698)	Heterogeneous nuclear ribonucleoprotein H2 OS=Homo sapiens OX=9606 GN=HNRNPH2 PE=1 SV=1	HNRH2_HUMAN	GLPFGCSKEEIVQFFSGLEIVPNGMTLPVDFQGR	0.997
LAT3-S262+UV	s262+uv5 (F003698)	Heterogeneous nuclear ribonucleoprotein H2 OS=Homo sapiens OX=9606 GN=HNRNPH2 PE=1 SV=1	HNRH2_HUMAN	LRGLPFGCSKEEIVQFFSGLEIVPNGMTLPVDFQGR	0.997
LAT3-S262+UV	s262+uv5 (F003698)	Heterogeneous nuclear ribonucleoprotein H2 OS=Homo sapiens OX=9606 GN=HNRNPH2 PE=1 SV=1	HNRH2_HUMAN	STGEAFVQFASQEIAEK	0.997
LAT3-S262-UV	S262-UV1 (F003699)	Heterogeneous nuclear ribonucleoprotein H2 OS=Homo sapiens OX=9606 GN=HNRNPH2 PE=1 SV=1	HNRH2_HUMAN	LRGLPFGCSKEEIVQFFSGLEIVPNGMTLPVDFQGR	0.997
LAT3-S262-UV	S262-UV1 (F003699)	Heterogeneous nuclear ribonucleoprotein H2 OS=Homo sapiens OX=9606 GN=HNRNPH2 PE=1 SV=1	HNRH2_HUMAN	STGEAFVQFASQEIAEK	0.997
LAT3-S262-UV	S262-UV2 (F003700)	Heterogeneous nuclear ribonucleoprotein H2 OS=Homo sapiens OX=9606 GN=HNRNPH2 PE=1 SV=1	HNRH2_HUMAN	STGEAFVQFASQEIAEK	0.997
LAT3-S262-UV	S262-UV2 (F003700)	Heterogeneous nuclear ribonucleoprotein H2 OS=Homo sapiens OX=9606 GN=HNRNPH2 PE=1 SV=1	HNRH2_HUMAN	YVEVFKSNSVEMDWVLK	0.995
LAT3-S262-UV	S262-UV3 (F003701)	Heterogeneous nuclear ribonucleoprotein H2 OS=Homo sapiens OX=9606 GN=HNRNPH2 PE=1 SV=1	HNRH2_HUMAN	LRGLPFGCSKEEIVQFFSGLEIVPNGMTLPVDFQGR	0.984
LAT3-S262-UV	S262-UV3 (F003701)	Heterogeneous nuclear ribonucleoprotein H2 OS=Homo sapiens OX=9606 GN=HNRNPH2 PE=1 SV=1	HNRH2_HUMAN	STGEAFVQFASQEIAEK	0.977
LAT3-S262-UV	S262-UV4 (F003702)	Heterogeneous nuclear ribonucleoprotein H2 OS=Homo sapiens OX=9606 GN=HNRNPH2 PE=1 SV=1	HNRH2_HUMAN	EGRPSGEAFVELESEEEVK	0.991
LAT3-S262-UV	S262-UV4 (F003702)	Heterogeneous nuclear ribonucleoprotein H2 OS=Homo sapiens OX=9606 GN=HNRNPH2 PE=1 SV=1	HNRH2_HUMAN	STGEAFVQFASQEIAEK	0.997
LAT3-S262-UV	S262-UV5 (F003703)	Heterogeneous nuclear ribonucleoprotein H2 OS=Homo sapiens OX=9606 GN=HNRNPH2 PE=1 SV=1	HNRH2_HUMAN	EGRPSGEAFVELESEEEVK	0.968
LAT3-S262-UV	S262-UV5 (F003703)	Heterogeneous nuclear ribonucleoprotein H2 OS=Homo sapiens OX=9606 GN=HNRNPH2 PE=1 SV=1	HNRH2_HUMAN	STGEAFVQFASQEIAEK	0.997
LAT3-S262+UV	S262+uv2 (F003695)	Heterogeneous nuclear ribonucleoprotein H3 OS=Homo sapiens OX=9606 GN=HNRNPH3 PE=1 SV=2	HNRH3_HUMAN	STGEAFVQFASK	0.997
LAT3-S262+UV	S262+UV3 (F003696)	Heterogeneous nuclear ribonucleoprotein H3 OS=Homo sapiens OX=9606 GN=HNRNPH3 PE=1 SV=2	HNRH3_HUMAN	STGEAFVQFASK	0.997
LAT3-S262+UV	S262+UV4 (F003697)	Heterogeneous nuclear ribonucleoprotein H3 OS=Homo sapiens OX=9606 GN=HNRNPH3 PE=1 SV=2	HNRH3_HUMAN	ATGEADVEFVTHEDAVAAMSK	0.997
LAT3-S262+UV	S262+UV4 (F003697)	Heterogeneous nuclear ribonucleoprotein H3 OS=Homo sapiens OX=9606 GN=HNRNPH3 PE=1 SV=2	HNRH3_HUMAN	LRGLPFGCSKEEIVQFFQGLEIVPNGITLTMDYQGR	0.997
LAT3-S262+UV	S262+UV4 (F003697)	Heterogeneous nuclear ribonucleoprotein H3 OS=Homo sapiens OX=9606 GN=HNRNPH3 PE=1 SV=2	HNRH3_HUMAN	STGEAFVQFASK	0.983
LAT3-S262+UV	s262+uv5 (F003698)	Heterogeneous nuclear ribonucleoprotein H3 OS=Homo sapiens OX=9606 GN=HNRNPH3 PE=1 SV=2	HNRH3_HUMAN	ATGEADVEFVTHEDAVAAMSK	0.995
LAT3-S262+UV	s262+uv5 (F003698)	Heterogeneous nuclear ribonucleoprotein H3 OS=Homo sapiens OX=9606 GN=HNRNPH3 PE=1 SV=2	HNRH3_HUMAN	STGEAFVQFASK	0.997
LAT3-S262-UV	S262-UV2 (F003700)	Heterogeneous nuclear ribonucleoprotein H3 OS=Homo sapiens OX=9606 GN=HNRNPH3 PE=1 SV=2	HNRH3_HUMAN	ATGEADVEFVTHEDAVAAMSK	0.996
LAT3-S262-UV	S262-UV5 (F003703)	Heterogeneous nuclear ribonucleoprotein H3 OS=Homo sapiens OX=9606 GN=HNRNPH3 PE=1 SV=2	HNRH3_HUMAN	STGEAFVQFASK	0.982
LAT3-S262+UV	S262+uv1 (F003694)	Heterogeneous nuclear ribonucleoproteins C1/C2 OS=Homo sapiens OX=9606 GN=HNRNPC PE=1 SV=4	HNRPC_HUMAN	MIAGQVLDINLAAEPK	0.997
LAT3-S262+UV	S262+uv1 (F003694)	Heterogeneous nuclear ribonucleoproteins C1/C2 OS=Homo sapiens OX=9606 GN=HNRNPC PE=1 SV=4	HNRPC_HUMAN	SMNSR	0.996
LAT3-S262+UV	S262+uv1 (F003694)	Heterogeneous nuclear ribonucleoproteins C1/C2 OS=Homo sapiens OX=9606 GN=HNRNPC PE=1 SV=4	HNRPC_HUMAN	VFIGNLNTLVVK	0.991
LAT3-S262+UV	S262+uv2 (F003695)	Heterogeneous nuclear ribonucleoproteins C1/C2 OS=Homo sapiens OX=9606 GN=HNRNPC PE=1 SV=4	HNRPC_HUMAN	MIAGQVLDINLAAEPK	0.997
LAT3-S262+UV	S262+uv2 (F003695)	Heterogeneous nuclear ribonucleoproteins C1/C2 OS=Homo sapiens OX=9606 GN=HNRNPC PE=1 SV=4	HNRPC_HUMAN	SMNSR	0.969
LAT3-S262+UV	S262+UV3 (F003696)	Heterogeneous nuclear ribonucleoproteins C1/C2 OS=Homo sapiens OX=9606 GN=HNRNPC PE=1 SV=4	HNRPC_HUMAN	MIAGQVLDINLAAEPK	0.997
LAT3-S262+UV	S262+UV4 (F003697)	Heterogeneous nuclear ribonucleoproteins C1/C2 OS=Homo sapiens OX=9606 GN=HNRNPC PE=1 SV=4	HNRPC_HUMAN	MIAGQVLDINLAAEPK	0.997
LAT3-S262+UV	s262+uv5 (F003698)	Heterogeneous nuclear ribonucleoproteins C1/C2 OS=Homo sapiens OX=9606 GN=HNRNPC PE=1 SV=4	HNRPC_HUMAN	MIAGQVLDINLAAEPK	0.997
LAT3-S262-UV	S262-UV1 (F003699)	Heterogeneous nuclear ribonucleoproteins C1/C2 OS=Homo sapiens OX=9606 GN=HNRNPC PE=1 SV=4	HNRPC_HUMAN	MIAGQVLDINLAAEPK	0.997
LAT3-S262-UV	S262-UV1 (F003699)	Heterogeneous nuclear ribonucleoproteins C1/C2 OS=Homo sapiens OX=9606 GN=HNRNPC PE=1 SV=4	HNRPC_HUMAN	SMNSR	0.952
LAT3-S262-UV	S262-UV2 (F003700)	Heterogeneous nuclear ribonucleoproteins C1/C2 OS=Homo sapiens OX=9606 GN=HNRNPC PE=1 SV=4	HNRPC_HUMAN	MIAGQVLDINLAAEPK	0.997
LAT3-S262-UV	S262-UV2 (F003700)	Heterogeneous nuclear ribonucleoproteins C1/C2 OS=Homo sapiens OX=9606 GN=HNRNPC PE=1 SV=4	HNRPC_HUMAN	MIAGQVLDINLAAEPKVNR	0.992
LAT3-S262-UV	S262-UV3 (F003701)	Heterogeneous nuclear ribonucleoproteins C1/C2 OS=Homo sapiens OX=9606 GN=HNRNPC PE=1 SV=4	HNRPC_HUMAN	MIAGQVLDINLAAEPK	0.997
LAT3-S262-UV	S262-UV3 (F003701)	Heterogeneous nuclear ribonucleoproteins C1/C2 OS=Homo sapiens OX=9606 GN=HNRNPC PE=1 SV=4	HNRPC_HUMAN	SMNSR	0.972
LAT3-S262-UV	S262-UV4 (F003702)	Heterogeneous nuclear ribonucleoproteins C1/C2 OS=Homo sapiens OX=9606 GN=HNRNPC PE=1 SV=4	HNRPC_HUMAN	MIAGQVLDINLAAEPK	0.997
LAT3-S262-UV	S262-UV5 (F003703)	Heterogeneous nuclear ribonucleoproteins C1/C2 OS=Homo sapiens OX=9606 GN=HNRNPC PE=1 SV=4	HNRPC_HUMAN	MIAGQVLDINLAAEPK	0.997
LAT3-S262+UV	S262+uv1 (F003694)	Heterogeneous nuclear ribonucleoprotein F OS=Homo sapiens OX=9606 GN=HNRNPF PE=1 SV=3	HNRPF_HUMAN	GLPFGCTKEEIVQFFSGLEIVPNGITLPVDPEGK	0.997
LAT3-S262+UV	S262+uv2 (F003695)	Heterogeneous nuclear ribonucleoprotein F OS=Homo sapiens OX=9606 GN=HNRNPF PE=1 SV=3	HNRPF_HUMAN	GLPFGCTKEEIVQFFSGLEIVPNGITLPVDPEGK	0.997
LAT3-S262+UV	S262+UV3 (F003696)	Heterogeneous nuclear ribonucleoprotein F OS=Homo sapiens OX=9606 GN=HNRNPF PE=1 SV=3	HNRPF_HUMAN	GLPFGCTKEEIVQFFSGLEIVPNGITLPVDPEGK	0.997
LAT3-S262+UV	S262+UV3 (F003696)	Heterogeneous nuclear ribonucleoprotein F OS=Homo sapiens OX=9606 GN=HNRNPF PE=1 SV=3	HNRPF_HUMAN	ITGEAFVQFASQELAEK	0.997
LAT3-S262+UV	S262+UV4 (F003697)	Heterogeneous nuclear ribonucleoprotein F OS=Homo sapiens OX=9606 GN=HNRNPF PE=1 SV=3	HNRPF_HUMAN	GLPFGCTKEEIVQFFSGLEIVPNGITLPVDPEGK	0.997
LAT3-S262+UV	s262+uv5 (F003698)	Heterogeneous nuclear ribonucleoprotein F OS=Homo sapiens OX=9606 GN=HNRNPF PE=1 SV=3	HNRPF_HUMAN	GLPFGCTKEEIVQFFSGLEIVPNGITLPVDPEGK	0.997
LAT3-S262+UV	s262+uv5 (F003698)	Heterogeneous nuclear ribonucleoprotein F OS=Homo sapiens OX=9606 GN=HNRNPF PE=1 SV=3	HNRPF_HUMAN	ITGEAFVQFASQELAEK	0.997
LAT3-S262-UV	S262-UV1 (F003699)	Heterogeneous nuclear ribonucleoprotein F OS=Homo sapiens OX=9606 GN=HNRNPF PE=1 SV=3	HNRPF_HUMAN	GLPFGCTKEEIVQFFSGLEIVPNGITLPVDPEGK	0.997
LAT3-S262-UV	S262-UV2 (F003700)	Heterogeneous nuclear ribonucleoprotein F OS=Homo sapiens OX=9606 GN=HNRNPF PE=1 SV=3	HNRPF_HUMAN	GLPFGCTKEEIVQFFSGLEIVPNGITLPVDPEGK	0.997
LAT3-S262-UV	S262-UV3 (F003701)	Heterogeneous nuclear ribonucleoprotein F OS=Homo sapiens OX=9606 GN=HNRNPF PE=1 SV=3	HNRPF_HUMAN	GLPFGCTKEEIVQFFSGLEIVPNGITLPVDPEGK	0.997
LAT3-S262-UV	S262-UV4 (F003702)	Heterogeneous nuclear ribonucleoprotein F OS=Homo sapiens OX=9606 GN=HNRNPF PE=1 SV=3	HNRPF_HUMAN	GLPFGCTKEEIVQFFSGLEIVPNGITLPVDPEGK	0.997
LAT3-S262-UV	S262-UV5 (F003703)	Heterogeneous nuclear ribonucleoprotein F OS=Homo sapiens OX=9606 GN=HNRNPF PE=1 SV=3	HNRPF_HUMAN	GLPFGCTKEEIVQFFSGLEIVPNGITLPVDPEGK	0.997
LAT3-S262-UV	S262-UV5 (F003703)	Heterogeneous nuclear ribonucleoprotein F OS=Homo sapiens OX=9606 GN=HNRNPF PE=1 SV=3	HNRPF_HUMAN	QSGEAFVELGSEDDVK	0.991
LAT3-S262+UV	S262+uv1 (F003694)	Heterogeneous nuclear ribonucleoprotein K OS=Homo sapiens OX=9606 GN=HNRNPK PE=1 SV=1	HNRPK_HUMAN	ALRTDYNASVSVPDSSGPER	0.996
LAT3-S262+UV	S262+uv1 (F003694)	Heterogeneous nuclear ribonucleoprotein K OS=Homo sapiens OX=9606 GN=HNRNPK PE=1 SV=1	HNRPK_HUMAN	ILSISADIETIGEILKK	0.997
LAT3-S262+UV	S262+uv2 (F003695)	Heterogeneous nuclear ribonucleoprotein K OS=Homo sapiens OX=9606 GN=HNRNPK PE=1 SV=1	HNRPK_HUMAN	ALRTDYNASVSVPDSSGPER	0.997
LAT3-S262+UV	S262+uv2 (F003695)	Heterogeneous nuclear ribonucleoprotein K OS=Homo sapiens OX=9606 GN=HNRNPK PE=1 SV=1	HNRPK_HUMAN	ILSISADIETIGEILK	0.985
LAT3-S262+UV	S262+uv2 (F003695)	Heterogeneous nuclear ribonucleoprotein K OS=Homo sapiens OX=9606 GN=HNRNPK PE=1 SV=1	HNRPK_HUMAN	ILSISADIETIGEILKK	0.997
LAT3-S262+UV	S262+uv2 (F003695)	Heterogeneous nuclear ribonucleoprotein K OS=Homo sapiens OX=9606 GN=HNRNPK PE=1 SV=1	HNRPK_HUMAN	LLIHQSLAGGIIGVK	0.997
LAT3-S262+UV	S262+UV3 (F003696)	Heterogeneous nuclear ribonucleoprotein K OS=Homo sapiens OX=9606 GN=HNRNPK PE=1 SV=1	HNRPK_HUMAN	ILSISADIETIGEILK	0.955
LAT3-S262+UV	S262+UV3 (F003696)	Heterogeneous nuclear ribonucleoprotein K OS=Homo sapiens OX=9606 GN=HNRNPK PE=1 SV=1	HNRPK_HUMAN	ILSISADIETIGEILKK	0.997
LAT3-S262+UV	S262+UV3 (F003696)	Heterogeneous nuclear ribonucleoprotein K OS=Homo sapiens OX=9606 GN=HNRNPK PE=1 SV=1	HNRPK_HUMAN	LLIHQSLAGGIIGVK	0.981
LAT3-S262+UV	S262+UV4 (F003697)	Heterogeneous nuclear ribonucleoprotein K OS=Homo sapiens OX=9606 GN=HNRNPK PE=1 SV=1	HNRPK_HUMAN	ALRTDYNASVSVPDSSGPER	0.991
LAT3-S262+UV	S262+UV4 (F003697)	Heterogeneous nuclear ribonucleoprotein K OS=Homo sapiens OX=9606 GN=HNRNPK PE=1 SV=1	HNRPK_HUMAN	IIPTLEEGLQLPSPTATSQLPLESDAVECLNY	0.997
LAT3-S262+UV	S262+UV4 (F003697)	Heterogeneous nuclear ribonucleoprotein K OS=Homo sapiens OX=9606 GN=HNRNPK PE=1 SV=1	HNRPK_HUMAN	ILSISADIETIGEILKK	0.997
LAT3-S262+UV	S262+UV4 (F003697)	Heterogeneous nuclear ribonucleoprotein K OS=Homo sapiens OX=9606 GN=HNRNPK PE=1 SV=1	HNRPK_HUMAN	LLIHQSLAGGIIGVK	0.997
LAT3-S262+UV	s262+uv5 (F003698)	Heterogeneous nuclear ribonucleoprotein K OS=Homo sapiens OX=9606 GN=HNRNPK PE=1 SV=1	HNRPK_HUMAN	ALRTDYNASVSVPDSSGPER	0.997
LAT3-S262+UV	s262+uv5 (F003698)	Heterogeneous nuclear ribonucleoprotein K OS=Homo sapiens OX=9606 GN=HNRNPK PE=1 SV=1	HNRPK_HUMAN	IILDLISESPIK	0.992
LAT3-S262+UV	s262+uv5 (F003698)	Heterogeneous nuclear ribonucleoprotein K OS=Homo sapiens OX=9606 GN=HNRNPK PE=1 SV=1	HNRPK_HUMAN	ILSISADIETIGEILK	0.997
LAT3-S262+UV	s262+uv5 (F003698)	Heterogeneous nuclear ribonucleoprotein K OS=Homo sapiens OX=9606 GN=HNRNPK PE=1 SV=1	HNRPK_HUMAN	ILSISADIETIGEILKK	0.997
LAT3-S262+UV	s262+uv5 (F003698)	Heterogeneous nuclear ribonucleoprotein K OS=Homo sapiens OX=9606 GN=HNRNPK PE=1 SV=1	HNRPK_HUMAN	LLIHQSLAGGIIGVK	0.997
LAT3-S262-UV	S262-UV1 (F003699)	Heterogeneous nuclear ribonucleoprotein K OS=Homo sapiens OX=9606 GN=HNRNPK PE=1 SV=1	HNRPK_HUMAN	ILSISADIETIGEILKK	0.997
LAT3-S262-UV	S262-UV2 (F003700)	Heterogeneous nuclear ribonucleoprotein K OS=Homo sapiens OX=9606 GN=HNRNPK PE=1 SV=1	HNRPK_HUMAN	ALRTDYNASVSVPDSSGPER	0.997
LAT3-S262-UV	S262-UV2 (F003700)	Heterogeneous nuclear ribonucleoprotein K OS=Homo sapiens OX=9606 GN=HNRNPK PE=1 SV=1	HNRPK_HUMAN	ILSISADIETIGEILK	0.997
LAT3-S262-UV	S262-UV2 (F003700)	Heterogeneous nuclear ribonucleoprotein K OS=Homo sapiens OX=9606 GN=HNRNPK PE=1 SV=1	HNRPK_HUMAN	ILSISADIETIGEILKK	0.997
LAT3-S262-UV	S262-UV3 (F003701)	Heterogeneous nuclear ribonucleoprotein K OS=Homo sapiens OX=9606 GN=HNRNPK PE=1 SV=1	HNRPK_HUMAN	ALRTDYNASVSVPDSSGPER	0.978
LAT3-S262-UV	S262-UV3 (F003701)	Heterogeneous nuclear ribonucleoprotein K OS=Homo sapiens OX=9606 GN=HNRNPK PE=1 SV=1	HNRPK_HUMAN	ILSISADIETIGEILK	0.997
LAT3-S262-UV	S262-UV3 (F003701)	Heterogeneous nuclear ribonucleoprotein K OS=Homo sapiens OX=9606 GN=HNRNPK PE=1 SV=1	HNRPK_HUMAN	ILSISADIETIGEILKK	0.997
LAT3-S262-UV	S262-UV3 (F003701)	Heterogeneous nuclear ribonucleoprotein K OS=Homo sapiens OX=9606 GN=HNRNPK PE=1 SV=1	HNRPK_HUMAN	LLIHQSLAGGIIGVK	0.995
LAT3-S262-UV	S262-UV4 (F003702)	Heterogeneous nuclear ribonucleoprotein K OS=Homo sapiens OX=9606 GN=HNRNPK PE=1 SV=1	HNRPK_HUMAN	ALRTDYNASVSVPDSSGPER	0.994
LAT3-S262-UV	S262-UV4 (F003702)	Heterogeneous nuclear ribonucleoprotein K OS=Homo sapiens OX=9606 GN=HNRNPK PE=1 SV=1	HNRPK_HUMAN	ILSISADIETIGEILK	0.997
LAT3-S262-UV	S262-UV4 (F003702)	Heterogeneous nuclear ribonucleoprotein K OS=Homo sapiens OX=9606 GN=HNRNPK PE=1 SV=1	HNRPK_HUMAN	ILSISADIETIGEILKK	0.997
LAT3-S262-UV	S262-UV5 (F003703)	Heterogeneous nuclear ribonucleoprotein K OS=Homo sapiens OX=9606 GN=HNRNPK PE=1 SV=1	HNRPK_HUMAN	ALRTDYNASVSVPDSSGPER	0.997
LAT3-S262-UV	S262-UV5 (F003703)	Heterogeneous nuclear ribonucleoprotein K OS=Homo sapiens OX=9606 GN=HNRNPK PE=1 SV=1	HNRPK_HUMAN	ILSISADIETIGEILK	0.997
LAT3-S262-UV	S262-UV5 (F003703)	Heterogeneous nuclear ribonucleoprotein K OS=Homo sapiens OX=9606 GN=HNRNPK PE=1 SV=1	HNRPK_HUMAN	ILSISADIETIGEILKK	0.997
LAT3-S262+UV	S262+uv1 (F003694)	Heterogeneous nuclear ribonucleoprotein L OS=Homo sapiens OX=9606 GN=HNRNPL PE=1 SV=2	HNRPL_HUMAN	IQHPSNVLHFFNAPLEVTEENFFEICDELGVK	0.997
LAT3-S262+UV	S262+uv1 (F003694)	Heterogeneous nuclear ribonucleoprotein L OS=Homo sapiens OX=9606 GN=HNRNPL PE=1 SV=2	HNRPL_HUMAN	IQHPSNVLHFFNAPLEVTEENFFEICDELGVKRPSSVK	0.997
LAT3-S262+UV	S262+uv1 (F003694)	Heterogeneous nuclear ribonucleoprotein L OS=Homo sapiens OX=9606 GN=HNRNPL PE=1 SV=2	HNRPL_HUMAN	TILNPIYSITTDVLYTICNPCGPVQR	0.997
LAT3-S262+UV	S262+uv2 (F003695)	Heterogeneous nuclear ribonucleoprotein L OS=Homo sapiens OX=9606 GN=HNRNPL PE=1 SV=2	HNRPL_HUMAN	IQHPSNVLHFFNAPLEVTEENFFEICDELGVK	0.997
LAT3-S262+UV	S262+uv2 (F003695)	Heterogeneous nuclear ribonucleoprotein L OS=Homo sapiens OX=9606 GN=HNRNPL PE=1 SV=2	HNRPL_HUMAN	IQHPSNVLHFFNAPLEVTEENFFEICDELGVKRPSSVK	0.997
LAT3-S262+UV	S262+uv2 (F003695)	Heterogeneous nuclear ribonucleoprotein L OS=Homo sapiens OX=9606 GN=HNRNPL PE=1 SV=2	HNRPL_HUMAN	TILNPIYSITTDVLYTICNPCGPVQR	0.997
LAT3-S262+UV	S262+UV3 (F003696)	Heterogeneous nuclear ribonucleoprotein L OS=Homo sapiens OX=9606 GN=HNRNPL PE=1 SV=2	HNRPL_HUMAN	IQHPSNVLHFFNAPLEVTEENFFEICDELGVK	0.997
LAT3-S262+UV	S262+UV3 (F003696)	Heterogeneous nuclear ribonucleoprotein L OS=Homo sapiens OX=9606 GN=HNRNPL PE=1 SV=2	HNRPL_HUMAN	IQHPSNVLHFFNAPLEVTEENFFEICDELGVKRPSSVK	0.997
LAT3-S262+UV	S262+UV4 (F003697)	Heterogeneous nuclear ribonucleoprotein L OS=Homo sapiens OX=9606 GN=HNRNPL PE=1 SV=2	HNRPL_HUMAN	IQHPSNVLHFFNAPLEVTEENFFEICDELGVKRPSSVK	0.997
LAT3-S262+UV	s262+uv5 (F003698)	Heterogeneous nuclear ribonucleoprotein L OS=Homo sapiens OX=9606 GN=HNRNPL PE=1 SV=2	HNRPL_HUMAN	IQHPSNVLHFFNAPLEVTEENFFEICDELGVKRPSSVK	0.997
LAT3-S262+UV	s262+uv5 (F003698)	Heterogeneous nuclear ribonucleoprotein L OS=Homo sapiens OX=9606 GN=HNRNPL PE=1 SV=2	HNRPL_HUMAN	TILNPIYSITTDVLYTICNPCGPVQR	0.997
LAT3-S262-UV	S262-UV2 (F003700)	Heterogeneous nuclear ribonucleoprotein L OS=Homo sapiens OX=9606 GN=HNRNPL PE=1 SV=2	HNRPL_HUMAN	NGVQAMVEFDSVQSAQR	0.997
LAT3-S262-UV	S262-UV4 (F003702)	Heterogeneous nuclear ribonucleoprotein L OS=Homo sapiens OX=9606 GN=HNRNPL PE=1 SV=2	HNRPL_HUMAN	NGVQAMVEFDSVQSAQR	0.997
LAT3-S262-UV	S262-UV5 (F003703)	Heterogeneous nuclear ribonucleoprotein L OS=Homo sapiens OX=9606 GN=HNRNPL PE=1 SV=2	HNRPL_HUMAN	NGVQAMVEFDSVQSAQR	0.996
LAT3-S262+UV	S262+uv1 (F003694)	Heterogeneous nuclear ribonucleoprotein Q OS=Homo sapiens OX=9606 GN=SYNCRIP PE=1 SV=2	HNRPQ_HUMAN	DLFEDELVPLFEKAGPIWDLR	0.997
LAT3-S262+UV	S262+uv2 (F003695)	Heterogeneous nuclear ribonucleoprotein Q OS=Homo sapiens OX=9606 GN=SYNCRIP PE=1 SV=2	HNRPQ_HUMAN	DLFEDELVPLFEKAGPIWDLR	0.997
LAT3-S262+UV	S262+UV4 (F003697)	Heterogeneous nuclear ribonucleoprotein Q OS=Homo sapiens OX=9606 GN=SYNCRIP PE=1 SV=2	HNRPQ_HUMAN	DLFEDELVPLFEKAGPIWDLR	0.997
LAT3-S262+UV	S262+UV4 (F003697)	Heterogeneous nuclear ribonucleoprotein Q OS=Homo sapiens OX=9606 GN=SYNCRIP PE=1 SV=2	HNRPQ_HUMAN	EQILEEFSKVTEGLTDVILY	0.995
LAT3-S262+UV	s262+uv5 (F003698)	Heterogeneous nuclear ribonucleoprotein Q OS=Homo sapiens OX=9606 GN=SYNCRIP PE=1 SV=2	HNRPQ_HUMAN	DLFEDELVPLFEKAGPIWDLR	0.997
LAT3-S262-UV	S262-UV1 (F003699)	Heterogeneous nuclear ribonucleoprotein Q OS=Homo sapiens OX=9606 GN=SYNCRIP PE=1 SV=2	HNRPQ_HUMAN	DLFEDELVPLFEKAGPIWDLR	0.997
LAT3-S262-UV	S262-UV2 (F003700)	Heterogeneous nuclear ribonucleoprotein Q OS=Homo sapiens OX=9606 GN=SYNCRIP PE=1 SV=2	HNRPQ_HUMAN	DLFEDELVPLFEKAGPIWDLR	0.997
LAT3-S262-UV	S262-UV3 (F003701)	Heterogeneous nuclear ribonucleoprotein Q OS=Homo sapiens OX=9606 GN=SYNCRIP PE=1 SV=2	HNRPQ_HUMAN	DLFEDELVPLFEKAGPIWDLR	0.997
LAT3-S262-UV	S262-UV4 (F003702)	Heterogeneous nuclear ribonucleoprotein Q OS=Homo sapiens OX=9606 GN=SYNCRIP PE=1 SV=2	HNRPQ_HUMAN	DLFEDELVPLFEKAGPIWDLR	0.997
LAT3-S262-UV	S262-UV5 (F003703)	Heterogeneous nuclear ribonucleoprotein Q OS=Homo sapiens OX=9606 GN=SYNCRIP PE=1 SV=2	HNRPQ_HUMAN	DLFEDELVPLFEKAGPIWDLR	0.997
LAT3-S262+UV	S262+UV3 (F003696)	Heterogeneous nuclear ribonucleoprotein R OS=Homo sapiens OX=9606 GN=HNRNPR PE=1 SV=1	HNRPR_HUMAN	TKENILEEFSKVTEGLVDVILYHQPDDK	0.992
LAT3-S262+UV	S262+UV3 (F003696)	Heterogeneous nuclear ribonucleoprotein R OS=Homo sapiens OX=9606 GN=HNRNPR PE=1 SV=1	HNRPR_HUMAN	TLIEAGLPQKVAERLDEIFQTGLVAYVDLDER	0.997
LAT3-S262+UV	S262+UV3 (F003696)	Heterogeneous nuclear ribonucleoprotein R OS=Homo sapiens OX=9606 GN=HNRNPR PE=1 SV=1	HNRPR_HUMAN	VAERLDEIFQTGLVAYVDLDER	0.994
LAT3-S262+UV	S262+UV4 (F003697)	Heterogeneous nuclear ribonucleoprotein R OS=Homo sapiens OX=9606 GN=HNRNPR PE=1 SV=1	HNRPR_HUMAN	TKENILEEFSKVTEGLVDVILYHQPDDK	0.974
LAT3-S262+UV	S262+UV4 (F003697)	Heterogeneous nuclear ribonucleoprotein R OS=Homo sapiens OX=9606 GN=HNRNPR PE=1 SV=1	HNRPR_HUMAN	TLIEAGLPQKVAERLDEIFQTGLVAYVDLDER	0.997
LAT3-S262+UV	s262+uv5 (F003698)	Heterogeneous nuclear ribonucleoprotein R OS=Homo sapiens OX=9606 GN=HNRNPR PE=1 SV=1	HNRPR_HUMAN	TKENILEEFSKVTEGLVDVILYHQPDDK	0.997
LAT3-S262+UV	s262+uv5 (F003698)	Heterogeneous nuclear ribonucleoprotein R OS=Homo sapiens OX=9606 GN=HNRNPR PE=1 SV=1	HNRPR_HUMAN	TLIEAGLPQKVAERLDEIFQTGLVAYVDLDER	0.997
LAT3-S262-UV	S262-UV1 (F003699)	Heterogeneous nuclear ribonucleoprotein R OS=Homo sapiens OX=9606 GN=HNRNPR PE=1 SV=1	HNRPR_HUMAN	DLYEDELVPLFEKAGPIWDLR	0.997
LAT3-S262+UV	S262+uv1 (F003694)	Heterogeneous nuclear ribonucleoprotein U OS=Homo sapiens OX=9606 GN=HNRNPU PE=1 SV=6	HNRPU_HUMAN	EKPYFPIPEEYTFIQNVPLEDR	0.956
LAT3-S262+UV	S262+uv1 (F003694)	Heterogeneous nuclear ribonucleoprotein U OS=Homo sapiens OX=9606 GN=HNRNPU PE=1 SV=6	HNRPU_HUMAN	GNFTLPEVAECFDEITYVELQKEEAQK	0.997
LAT3-S262+UV	S262+uv1 (F003694)	Heterogeneous nuclear ribonucleoprotein U OS=Homo sapiens OX=9606 GN=HNRNPU PE=1 SV=6	HNRPU_HUMAN	MKGNFTLPEVAECFDEITYVELQKEEAQK	0.995
LAT3-S262+UV	S262+uv1 (F003694)	Heterogeneous nuclear ribonucleoprotein U OS=Homo sapiens OX=9606 GN=HNRNPU PE=1 SV=6	HNRPU_HUMAN	NFILDQTNVSAAAQR	0.997
LAT3-S262+UV	S262+uv2 (F003695)	Heterogeneous nuclear ribonucleoprotein U OS=Homo sapiens OX=9606 GN=HNRNPU PE=1 SV=6	HNRPU_HUMAN	GNFTLPEVAECFDEITYVELQKEEAQK	0.997
LAT3-S262+UV	S262+uv2 (F003695)	Heterogeneous nuclear ribonucleoprotein U OS=Homo sapiens OX=9606 GN=HNRNPU PE=1 SV=6	HNRPU_HUMAN	NFILDQTNVSAAAQR	0.997
LAT3-S262+UV	S262+UV3 (F003696)	Heterogeneous nuclear ribonucleoprotein U OS=Homo sapiens OX=9606 GN=HNRNPU PE=1 SV=6	HNRPU_HUMAN	GNFTLPEVAECFDEITYVELQKEEAQK	0.997
LAT3-S262+UV	S262+UV3 (F003696)	Heterogeneous nuclear ribonucleoprotein U OS=Homo sapiens OX=9606 GN=HNRNPU PE=1 SV=6	HNRPU_HUMAN	NFILDQTNVSAAAQR	0.997
LAT3-S262+UV	S262+UV4 (F003697)	Heterogeneous nuclear ribonucleoprotein U OS=Homo sapiens OX=9606 GN=HNRNPU PE=1 SV=6	HNRPU_HUMAN	GNFTLPEVAECFDEITYVELQKEEAQK	0.997
LAT3-S262+UV	S262+UV4 (F003697)	Heterogeneous nuclear ribonucleoprotein U OS=Homo sapiens OX=9606 GN=HNRNPU PE=1 SV=6	HNRPU_HUMAN	MKGNFTLPEVAECFDEITYVELQKEEAQK	0.997
LAT3-S262+UV	S262+UV4 (F003697)	Heterogeneous nuclear ribonucleoprotein U OS=Homo sapiens OX=9606 GN=HNRNPU PE=1 SV=6	HNRPU_HUMAN	NFILDQTNVSAAAQR	0.997
LAT3-S262+UV	S262+UV4 (F003697)	Heterogeneous nuclear ribonucleoprotein U OS=Homo sapiens OX=9606 GN=HNRNPU PE=1 SV=6	HNRPU_HUMAN	NFILDQTNVSAAAQRR	0.993
LAT3-S262+UV	s262+uv5 (F003698)	Heterogeneous nuclear ribonucleoprotein U OS=Homo sapiens OX=9606 GN=HNRNPU PE=1 SV=6	HNRPU_HUMAN	GNFTLPEVAECFDEITYVELQKEEAQK	0.997
LAT3-S262+UV	s262+uv5 (F003698)	Heterogeneous nuclear ribonucleoprotein U OS=Homo sapiens OX=9606 GN=HNRNPU PE=1 SV=6	HNRPU_HUMAN	NFILDQTNVSAAAQR	0.997
LAT3-S262-UV	S262-UV2 (F003700)	Heterogeneous nuclear ribonucleoprotein U OS=Homo sapiens OX=9606 GN=HNRNPU PE=1 SV=6	HNRPU_HUMAN	NFILDQTNVSAAAQR	0.997
LAT3-S262-UV	S262-UV3 (F003701)	Heterogeneous nuclear ribonucleoprotein U OS=Homo sapiens OX=9606 GN=HNRNPU PE=1 SV=6	HNRPU_HUMAN	NFILDQTNVSAAAQR	0.997
LAT3-S262-UV	S262-UV4 (F003702)	Heterogeneous nuclear ribonucleoprotein U OS=Homo sapiens OX=9606 GN=HNRNPU PE=1 SV=6	HNRPU_HUMAN	MKGNFTLPEVAECFDEITYVELQKEEAQK	0.997
LAT3-S262-UV	S262-UV4 (F003702)	Heterogeneous nuclear ribonucleoprotein U OS=Homo sapiens OX=9606 GN=HNRNPU PE=1 SV=6	HNRPU_HUMAN	NFILDQTNVSAAAQR	0.997
LAT3-S262-UV	S262-UV5 (F003703)	Heterogeneous nuclear ribonucleoprotein U OS=Homo sapiens OX=9606 GN=HNRNPU PE=1 SV=6	HNRPU_HUMAN	GNFTLPEVAECFDEITYVELQKEEAQK	0.997
LAT3-S262-UV	S262-UV5 (F003703)	Heterogeneous nuclear ribonucleoprotein U OS=Homo sapiens OX=9606 GN=HNRNPU PE=1 SV=6	HNRPU_HUMAN	MKGNFTLPEVAECFDEITYVELQKEEAQK	0.997
LAT3-S262-UV	S262-UV5 (F003703)	Heterogeneous nuclear ribonucleoprotein U OS=Homo sapiens OX=9606 GN=HNRNPU PE=1 SV=6	HNRPU_HUMAN	NFILDQTNVSAAAQR	0.997
LAT3-S262+UV	S262+uv1 (F003694)	Interleukin enhancer-binding factor 3 OS=Homo sapiens OX=9606 GN=ILF3 PE=1 SV=3	ILF3_HUMAN	EKPTTALLDKVADNLAIQLAAVTEDKYEILQSVDDAAIVIK	0.997
LAT3-S262+UV	S262+uv2 (F003695)	Interleukin enhancer-binding factor 3 OS=Homo sapiens OX=9606 GN=ILF3 PE=1 SV=3	ILF3_HUMAN	EKPTTALLDKVADNLAIQLAAVTEDKYEILQSVDDAAIVIK	0.997
LAT3-S262+UV	S262+UV3 (F003696)	Interleukin enhancer-binding factor 3 OS=Homo sapiens OX=9606 GN=ILF3 PE=1 SV=3	ILF3_HUMAN	EKPTTALLDKVADNLAIQLAAVTEDKYEILQSVDDAAIVIK	0.997
LAT3-S262+UV	S262+UV3 (F003696)	Interleukin enhancer-binding factor 3 OS=Homo sapiens OX=9606 GN=ILF3 PE=1 SV=3	ILF3_HUMAN	VADNLAIQLAAVTEDKYEILQSVDDAAIVIK	0.997
LAT3-S262+UV	S262+UV4 (F003697)	Interleukin enhancer-binding factor 3 OS=Homo sapiens OX=9606 GN=ILF3 PE=1 SV=3	ILF3_HUMAN	EKPTTALLDKVADNLAIQLAAVTEDKYEILQSVDDAAIVIK	0.997
LAT3-S262+UV	S262+UV4 (F003697)	Interleukin enhancer-binding factor 3 OS=Homo sapiens OX=9606 GN=ILF3 PE=1 SV=3	ILF3_HUMAN	VADNLAIQLAAVTEDKYEILQSVDDAAIVIK	0.997
LAT3-S262+UV	s262+uv5 (F003698)	Interleukin enhancer-binding factor 3 OS=Homo sapiens OX=9606 GN=ILF3 PE=1 SV=3	ILF3_HUMAN	EKPTTALLDKVADNLAIQLAAVTEDKYEILQSVDDAAIVIK	0.997
LAT3-S262+UV	s262+uv5 (F003698)	Interleukin enhancer-binding factor 3 OS=Homo sapiens OX=9606 GN=ILF3 PE=1 SV=3	ILF3_HUMAN	VADNLAIQLAAVTEDKYEILQSVDDAAIVIK	0.997
LAT3-S262+UV	S262+uv1 (F003694)	Matrin-3 OS=Homo sapiens OX=9606 GN=MATR3 PE=1 SV=2	MATR3_HUMAN	DLSAAGIGLLAAATQSLSMPASLGR	0.997
LAT3-S262+UV	S262+uv2 (F003695)	Matrin-3 OS=Homo sapiens OX=9606 GN=MATR3 PE=1 SV=2	MATR3_HUMAN	DLSAAGIGLLAAATQSLSMPASLGR	0.997
LAT3-S262+UV	S262+UV3 (F003696)	Matrin-3 OS=Homo sapiens OX=9606 GN=MATR3 PE=1 SV=2	MATR3_HUMAN	DLSAAGIGLLAAATQSLSMPASLGR	0.997
LAT3-S262+UV	S262+UV4 (F003697)	Matrin-3 OS=Homo sapiens OX=9606 GN=MATR3 PE=1 SV=2	MATR3_HUMAN	DLSAAGIGLLAAATQSLSMPASLGR	0.997
LAT3-S262+UV	s262+uv5 (F003698)	Matrin-3 OS=Homo sapiens OX=9606 GN=MATR3 PE=1 SV=2	MATR3_HUMAN	DLSAAGIGLLAAATQSLSMPASLGR	0.997
LAT3-S262+UV	s262+uv5 (F003698)	Matrin-3 OS=Homo sapiens OX=9606 GN=MATR3 PE=1 SV=2	MATR3_HUMAN	YQLLQLVEPFGVISNHLILNK	0.997
LAT3-S262-UV	S262-UV1 (F003699)	Matrin-3 OS=Homo sapiens OX=9606 GN=MATR3 PE=1 SV=2	MATR3_HUMAN	DLSAAGIGLLAAATQSLSMPASLGR	0.997
LAT3-S262-UV	S262-UV2 (F003700)	Matrin-3 OS=Homo sapiens OX=9606 GN=MATR3 PE=1 SV=2	MATR3_HUMAN	DLSAAGIGLLAAATQSLSMPASLGR	0.997
LAT3-S262-UV	S262-UV3 (F003701)	Matrin-3 OS=Homo sapiens OX=9606 GN=MATR3 PE=1 SV=2	MATR3_HUMAN	DLSAAGIGLLAAATQSLSMPASLGR	0.997
LAT3-S262-UV	S262-UV4 (F003702)	Matrin-3 OS=Homo sapiens OX=9606 GN=MATR3 PE=1 SV=2	MATR3_HUMAN	DLSAAGIGLLAAATQSLSMPASLGR	0.997
LAT3-S262-UV	S262-UV5 (F003703)	Matrin-3 OS=Homo sapiens OX=9606 GN=MATR3 PE=1 SV=2	MATR3_HUMAN	DLSAAGIGLLAAATQSLSMPASLGR	0.997
LAT3-S262+UV	S262+uv1 (F003694)	DNA-dependent protein kinase catalytic subunit OS=Homo sapiens OX=9606 GN=PRKDC PE=1 SV=3	PRKDC_HUMAN	LQSVQALTEIQEFISFISK	0.997
LAT3-S262+UV	S262+uv1 (F003694)	DNA-dependent protein kinase catalytic subunit OS=Homo sapiens OX=9606 GN=PRKDC PE=1 SV=3	PRKDC_HUMAN	VYELLGLLGEVHPSEMINNAENLFR	0.997
LAT3-S262+UV	S262+uv2 (F003695)	DNA-dependent protein kinase catalytic subunit OS=Homo sapiens OX=9606 GN=PRKDC PE=1 SV=3	PRKDC_HUMAN	LQSVQALTEIQEFISFISK	0.997
LAT3-S262+UV	S262+UV3 (F003696)	DNA-dependent protein kinase catalytic subunit OS=Homo sapiens OX=9606 GN=PRKDC PE=1 SV=3	PRKDC_HUMAN	EFREEESLVEQFVFEALVIYMESLALAHADEK	0.986
LAT3-S262+UV	S262+UV3 (F003696)	DNA-dependent protein kinase catalytic subunit OS=Homo sapiens OX=9606 GN=PRKDC PE=1 SV=3	PRKDC_HUMAN	LQSVQALTEIQEFISFISK	0.997
LAT3-S262+UV	S262+UV4 (F003697)	DNA-dependent protein kinase catalytic subunit OS=Homo sapiens OX=9606 GN=PRKDC PE=1 SV=3	PRKDC_HUMAN	LQSVQALTEIQEFISFISK	0.997
LAT3-S262+UV	s262+uv5 (F003698)	DNA-dependent protein kinase catalytic subunit OS=Homo sapiens OX=9606 GN=PRKDC PE=1 SV=3	PRKDC_HUMAN	LQSVQALTEIQEFISFISK	0.997
LAT3-S262+UV	s262+uv5 (F003698)	DNA-dependent protein kinase catalytic subunit OS=Homo sapiens OX=9606 GN=PRKDC PE=1 SV=3	PRKDC_HUMAN	VYELLGLLGEVHPSEMINNAENLFR	0.992
LAT3-S262-UV	S262-UV2 (F003700)	DNA-dependent protein kinase catalytic subunit OS=Homo sapiens OX=9606 GN=PRKDC PE=1 SV=3	PRKDC_HUMAN	LQSVQALTEIQEFISFISK	0.997
LAT3-S262-UV	S262-UV4 (F003702)	DNA-dependent protein kinase catalytic subunit OS=Homo sapiens OX=9606 GN=PRKDC PE=1 SV=3	PRKDC_HUMAN	LQSVQALTEIQEFISFISK	0.997
LAT3-S262-UV	S262-UV5 (F003703)	DNA-dependent protein kinase catalytic subunit OS=Homo sapiens OX=9606 GN=PRKDC PE=1 SV=3	PRKDC_HUMAN	LQSVQALTEIQEFISFISK	0.997
LAT3-S262+UV	S262+uv1 (F003694)	Pre-mRNA-processing factor 19 OS=Homo sapiens OX=9606 GN=PRPF19 PE=1 SV=1	PRP19_HUMAN	EALATLKPQAGLIVPQAVPSSQPSVVGAGEPMDLGELVGMTPEIIQKLQDK	0.994
LAT3-S262+UV	S262+uv2 (F003695)	Pre-mRNA-processing factor 19 OS=Homo sapiens OX=9606 GN=PRPF19 PE=1 SV=1	PRP19_HUMAN	EALATLKPQAGLIVPQAVPSSQPSVVGAGEPMDLGELVGMTPEIIQKLQDK	0.997
LAT3-S262+UV	s262+uv5 (F003698)	Pre-mRNA-processing factor 19 OS=Homo sapiens OX=9606 GN=PRPF19 PE=1 SV=1	PRP19_HUMAN	AHESAVTGLSLHATGDYLLSSSDDQYWAFSDIQTGR	0.997
LAT3-S262+UV	s262+uv5 (F003698)	Pre-mRNA-processing factor 19 OS=Homo sapiens OX=9606 GN=PRPF19 PE=1 SV=1	PRP19_HUMAN	EALATLKPQAGLIVPQAVPSSQPSVVGAGEPMDLGELVGMTPEIIQKLQDK	0.974
LAT3-S262+UV	S262+UV3 (F003696)	Polypyrimidine tract-binding protein 1 OS=Homo sapiens OX=9606 GN=PTBP1 PE=1 SV=1	PTBP1_HUMAN	IIVENLFYPVTLDVLHQIFSK	0.983
LAT3-S262-UV	S262-UV1 (F003699)	Polypyrimidine tract-binding protein 1 OS=Homo sapiens OX=9606 GN=PTBP1 PE=1 SV=1	PTBP1_HUMAN	AQAALQAVNSVQSGNLALAASAAAVDAGMAMAGQSPVLR	0.997
LAT3-S262-UV	S262-UV1 (F003699)	Polypyrimidine tract-binding protein 1 OS=Homo sapiens OX=9606 GN=PTBP1 PE=1 SV=1	PTBP1_HUMAN	KLPIDVTEGEVISLGLPFGKVTNLLMLK	0.997
LAT3-S262-UV	S262-UV3 (F003701)	Polypyrimidine tract-binding protein 1 OS=Homo sapiens OX=9606 GN=PTBP1 PE=1 SV=1	PTBP1_HUMAN	IIVENLFYPVTLDVLHQIFSK	0.989
LAT3-S262+UV	S262+UV4 (F003697)	60S ribosomal protein L7a OS=Homo sapiens OX=9606 GN=RPL7A PE=1 SV=2	RL7A_HUMAN	AQLVVIAHDVDPIELVVFLPALCR	0.997
LAT3-S262+UV	S262+UV4 (F003697)	60S ribosomal protein L7a OS=Homo sapiens OX=9606 GN=RPL7A PE=1 SV=2	RL7A_HUMAN	KAQLVVIAHDVDPIELVVFLPALCR	0.99
LAT3-S262-UV	S262-UV1 (F003699)	60S ribosomal protein L7a OS=Homo sapiens OX=9606 GN=RPL7A PE=1 SV=2	RL7A_HUMAN	AQLVVIAHDVDPIELVVFLPALCR	0.995
LAT3-S262-UV	S262-UV4 (F003702)	60S ribosomal protein L7a OS=Homo sapiens OX=9606 GN=RPL7A PE=1 SV=2	RL7A_HUMAN	AQLVVIAHDVDPIELVVFLPALCR	0.991
LAT3-S262-UV	S262-UV5 (F003703)	60S ribosomal protein L7a OS=Homo sapiens OX=9606 GN=RPL7A PE=1 SV=2	RL7A_HUMAN	AQLVVIAHDVDPIELVVFLPALCR	0.997
LAT3-S262+UV	S262+uv2 (F003695)	Heterogeneous nuclear ribonucleoprotein A0 OS=Homo sapiens OX=9606 GN=HNRNPA0 PE=1 SV=1	ROA0_HUMAN	GHFEAFGTLTDCVVVVNPQTKR	0.997
LAT3-S262+UV	S262+UV3 (F003696)	Heterogeneous nuclear ribonucleoprotein A0 OS=Homo sapiens OX=9606 GN=HNRNPA0 PE=1 SV=1	ROA0_HUMAN	CFGFVTYSNVEEADAAMAASPHAVDGNTVELKR	0.997
LAT3-S262+UV	S262+UV3 (F003696)	Heterogeneous nuclear ribonucleoprotein A0 OS=Homo sapiens OX=9606 GN=HNRNPA0 PE=1 SV=1	ROA0_HUMAN	GHFEAFGTLTDCVVVVNPQTK	0.997
LAT3-S262+UV	S262+UV3 (F003696)	Heterogeneous nuclear ribonucleoprotein A0 OS=Homo sapiens OX=9606 GN=HNRNPA0 PE=1 SV=1	ROA0_HUMAN	GHFEAFGTLTDCVVVVNPQTKR	0.997
LAT3-S262+UV	S262+UV4 (F003697)	Heterogeneous nuclear ribonucleoprotein A0 OS=Homo sapiens OX=9606 GN=HNRNPA0 PE=1 SV=1	ROA0_HUMAN	CFGFVTYSNVEEADAAMAASPHAVDGNTVELKR	0.997
LAT3-S262+UV	S262+UV4 (F003697)	Heterogeneous nuclear ribonucleoprotein A0 OS=Homo sapiens OX=9606 GN=HNRNPA0 PE=1 SV=1	ROA0_HUMAN	GHFEAFGTLTDCVVVVNPQTK	0.997
LAT3-S262+UV	S262+UV4 (F003697)	Heterogeneous nuclear ribonucleoprotein A0 OS=Homo sapiens OX=9606 GN=HNRNPA0 PE=1 SV=1	ROA0_HUMAN	GHFEAFGTLTDCVVVVNPQTKR	0.997
LAT3-S262+UV	s262+uv5 (F003698)	Heterogeneous nuclear ribonucleoprotein A0 OS=Homo sapiens OX=9606 GN=HNRNPA0 PE=1 SV=1	ROA0_HUMAN	CFGFVTYSNVEEADAAMAASPHAVDGNTVELKR	0.958
LAT3-S262+UV	s262+uv5 (F003698)	Heterogeneous nuclear ribonucleoprotein A0 OS=Homo sapiens OX=9606 GN=HNRNPA0 PE=1 SV=1	ROA0_HUMAN	GHFEAFGTLTDCVVVVNPQTK	0.997
LAT3-S262+UV	s262+uv5 (F003698)	Heterogeneous nuclear ribonucleoprotein A0 OS=Homo sapiens OX=9606 GN=HNRNPA0 PE=1 SV=1	ROA0_HUMAN	GHFEAFGTLTDCVVVVNPQTKR	0.997
LAT3-S262-UV	S262-UV1 (F003699)	Heterogeneous nuclear ribonucleoprotein A0 OS=Homo sapiens OX=9606 GN=HNRNPA0 PE=1 SV=1	ROA0_HUMAN	GHFEAFGTLTDCVVVVNPQTKR	0.997
LAT3-S262-UV	S262-UV2 (F003700)	Heterogeneous nuclear ribonucleoprotein A0 OS=Homo sapiens OX=9606 GN=HNRNPA0 PE=1 SV=1	ROA0_HUMAN	CFGFVTYSNVEEADAAMAASPHAVDGNTVELKR	0.997
LAT3-S262-UV	S262-UV2 (F003700)	Heterogeneous nuclear ribonucleoprotein A0 OS=Homo sapiens OX=9606 GN=HNRNPA0 PE=1 SV=1	ROA0_HUMAN	GHFEAFGTLTDCVVVVNPQTK	0.992
LAT3-S262-UV	S262-UV3 (F003701)	Heterogeneous nuclear ribonucleoprotein A0 OS=Homo sapiens OX=9606 GN=HNRNPA0 PE=1 SV=1	ROA0_HUMAN	GHFEAFGTLTDCVVVVNPQTKR	0.997
LAT3-S262-UV	S262-UV4 (F003702)	Heterogeneous nuclear ribonucleoprotein A0 OS=Homo sapiens OX=9606 GN=HNRNPA0 PE=1 SV=1	ROA0_HUMAN	CFGFVTYSNVEEADAAMAASPHAVDGNTVELKR	0.997
LAT3-S262-UV	S262-UV5 (F003703)	Heterogeneous nuclear ribonucleoprotein A0 OS=Homo sapiens OX=9606 GN=HNRNPA0 PE=1 SV=1	ROA0_HUMAN	CFGFVTYSNVEEADAAMAASPHAVDGNTVELKR	0.997
LAT3-S262+UV	S262+uv1 (F003694)	Heterogeneous nuclear ribonucleoprotein A1 OS=Homo sapiens OX=9606 GN=HNRNPA1 PE=1 SV=5	ROA1_HUMAN	DYFEQYGKIEVIEIMTDR	0.997
LAT3-S262+UV	S262+uv1 (F003694)	Heterogeneous nuclear ribonucleoprotein A1 OS=Homo sapiens OX=9606 GN=HNRNPA1 PE=1 SV=5	ROA1_HUMAN	GFGFVTYATVEEVDAAMNARPHKVDGR	0.997
LAT3-S262+UV	S262+uv1 (F003694)	Heterogeneous nuclear ribonucleoprotein A1 OS=Homo sapiens OX=9606 GN=HNRNPA1 PE=1 SV=5	ROA1_HUMAN	KLFIGGLSFETTDESLR	0.997
LAT3-S262+UV	S262+uv1 (F003694)	Heterogeneous nuclear ribonucleoprotein A1 OS=Homo sapiens OX=9606 GN=HNRNPA1 PE=1 SV=5	ROA1_HUMAN	LFIGGLSFETTDESLR	0.997
LAT3-S262+UV	S262+uv2 (F003695)	Heterogeneous nuclear ribonucleoprotein A1 OS=Homo sapiens OX=9606 GN=HNRNPA1 PE=1 SV=5	ROA1_HUMAN	DYFEQYGKIEVIEIMTDR	0.997
LAT3-S262+UV	S262+uv2 (F003695)	Heterogeneous nuclear ribonucleoprotein A1 OS=Homo sapiens OX=9606 GN=HNRNPA1 PE=1 SV=5	ROA1_HUMAN	DYFEQYGKIEVIEIMTDRGSGK	0.997
LAT3-S262+UV	S262+uv2 (F003695)	Heterogeneous nuclear ribonucleoprotein A1 OS=Homo sapiens OX=9606 GN=HNRNPA1 PE=1 SV=5	ROA1_HUMAN	GFGFVTYATVEEVDAAMNARPHKVDGR	0.997
LAT3-S262+UV	S262+uv2 (F003695)	Heterogeneous nuclear ribonucleoprotein A1 OS=Homo sapiens OX=9606 GN=HNRNPA1 PE=1 SV=5	ROA1_HUMAN	KLFIGGLSFETTDESLR	0.997
LAT3-S262+UV	S262+uv2 (F003695)	Heterogeneous nuclear ribonucleoprotein A1 OS=Homo sapiens OX=9606 GN=HNRNPA1 PE=1 SV=5	ROA1_HUMAN	SHFEQWGTLTDCVVMRDPNTKR	0.997
LAT3-S262+UV	S262+UV3 (F003696)	Heterogeneous nuclear ribonucleoprotein A1 OS=Homo sapiens OX=9606 GN=HNRNPA1 PE=1 SV=5	ROA1_HUMAN	GFGFVTYATVEEVDAAMNARPHKVDGR	0.997
LAT3-S262+UV	S262+UV3 (F003696)	Heterogeneous nuclear ribonucleoprotein A1 OS=Homo sapiens OX=9606 GN=HNRNPA1 PE=1 SV=5	ROA1_HUMAN	KLFIGGLSFETTDESLR	0.997
LAT3-S262+UV	S262+UV3 (F003696)	Heterogeneous nuclear ribonucleoprotein A1 OS=Homo sapiens OX=9606 GN=HNRNPA1 PE=1 SV=5	ROA1_HUMAN	SHFEQWGTLTDCVVMRDPNTKR	0.997
LAT3-S262+UV	S262+UV4 (F003697)	Heterogeneous nuclear ribonucleoprotein A1 OS=Homo sapiens OX=9606 GN=HNRNPA1 PE=1 SV=5	ROA1_HUMAN	DYFEQYGKIEVIEIMTDR	0.997
LAT3-S262+UV	S262+UV4 (F003697)	Heterogeneous nuclear ribonucleoprotein A1 OS=Homo sapiens OX=9606 GN=HNRNPA1 PE=1 SV=5	ROA1_HUMAN	GFGFVTYATVEEVDAAMNARPHKVDGR	0.997
LAT3-S262+UV	S262+UV4 (F003697)	Heterogeneous nuclear ribonucleoprotein A1 OS=Homo sapiens OX=9606 GN=HNRNPA1 PE=1 SV=5	ROA1_HUMAN	KLFIGGLSFETTDESLR	0.997
LAT3-S262+UV	S262+UV4 (F003697)	Heterogeneous nuclear ribonucleoprotein A1 OS=Homo sapiens OX=9606 GN=HNRNPA1 PE=1 SV=5	ROA1_HUMAN	LFIGGLSFETTDESLR	0.997
LAT3-S262+UV	S262+UV4 (F003697)	Heterogeneous nuclear ribonucleoprotein A1 OS=Homo sapiens OX=9606 GN=HNRNPA1 PE=1 SV=5	ROA1_HUMAN	SHFEQWGTLTDCVVMRDPNTKR	0.997
LAT3-S262+UV	s262+uv5 (F003698)	Heterogeneous nuclear ribonucleoprotein A1 OS=Homo sapiens OX=9606 GN=HNRNPA1 PE=1 SV=5	ROA1_HUMAN	GFGFVTYATVEEVDAAMNARPHKVDGR	0.997
LAT3-S262+UV	s262+uv5 (F003698)	Heterogeneous nuclear ribonucleoprotein A1 OS=Homo sapiens OX=9606 GN=HNRNPA1 PE=1 SV=5	ROA1_HUMAN	KLFIGGLSFETTDESLR	0.997
LAT3-S262+UV	s262+uv5 (F003698)	Heterogeneous nuclear ribonucleoprotein A1 OS=Homo sapiens OX=9606 GN=HNRNPA1 PE=1 SV=5	ROA1_HUMAN	LFIGGLSFETTDESLR	0.997
LAT3-S262+UV	s262+uv5 (F003698)	Heterogeneous nuclear ribonucleoprotein A1 OS=Homo sapiens OX=9606 GN=HNRNPA1 PE=1 SV=5	ROA1_HUMAN	SHFEQWGTLTDCVVMRDPNTKR	0.997
LAT3-S262-UV	S262-UV2 (F003700)	Heterogeneous nuclear ribonucleoprotein A1 OS=Homo sapiens OX=9606 GN=HNRNPA1 PE=1 SV=5	ROA1_HUMAN	DYFEQYGKIEVIEIMTDR	0.997
LAT3-S262-UV	S262-UV2 (F003700)	Heterogeneous nuclear ribonucleoprotein A1 OS=Homo sapiens OX=9606 GN=HNRNPA1 PE=1 SV=5	ROA1_HUMAN	GFGFVTYATVEEVDAAMNARPHKVDGR	0.997
LAT3-S262-UV	S262-UV2 (F003700)	Heterogeneous nuclear ribonucleoprotein A1 OS=Homo sapiens OX=9606 GN=HNRNPA1 PE=1 SV=5	ROA1_HUMAN	LFIGGLSFETTDESLR	0.997
LAT3-S262-UV	S262-UV3 (F003701)	Heterogeneous nuclear ribonucleoprotein A1 OS=Homo sapiens OX=9606 GN=HNRNPA1 PE=1 SV=5	ROA1_HUMAN	DYFEQYGKIEVIEIMTDR	0.974
LAT3-S262-UV	S262-UV3 (F003701)	Heterogeneous nuclear ribonucleoprotein A1 OS=Homo sapiens OX=9606 GN=HNRNPA1 PE=1 SV=5	ROA1_HUMAN	GFGFVTYATVEEVDAAMNARPHKVDGR	0.997
LAT3-S262-UV	S262-UV3 (F003701)	Heterogeneous nuclear ribonucleoprotein A1 OS=Homo sapiens OX=9606 GN=HNRNPA1 PE=1 SV=5	ROA1_HUMAN	LFIGGLSFETTDESLR	0.992
LAT3-S262-UV	S262-UV3 (F003701)	Heterogeneous nuclear ribonucleoprotein A1 OS=Homo sapiens OX=9606 GN=HNRNPA1 PE=1 SV=5	ROA1_HUMAN	SHFEQWGTLTDCVVMRDPNTKR	0.986
LAT3-S262-UV	S262-UV3 (F003701)	Heterogeneous nuclear ribonucleoprotein A1 OS=Homo sapiens OX=9606 GN=HNRNPA1 PE=1 SV=5	ROA1_HUMAN	SRGFGFVTYATVEEVDAAMNARPHKVDGR	0.996
LAT3-S262-UV	S262-UV4 (F003702)	Heterogeneous nuclear ribonucleoprotein A1 OS=Homo sapiens OX=9606 GN=HNRNPA1 PE=1 SV=5	ROA1_HUMAN	GFGFVTYATVEEVDAAMNARPHKVDGR	0.996
LAT3-S262-UV	S262-UV5 (F003703)	Heterogeneous nuclear ribonucleoprotein A1 OS=Homo sapiens OX=9606 GN=HNRNPA1 PE=1 SV=5	ROA1_HUMAN	KLFIGGLSFETTDESLR	0.997
LAT3-S262-UV	S262-UV5 (F003703)	Heterogeneous nuclear ribonucleoprotein A1 OS=Homo sapiens OX=9606 GN=HNRNPA1 PE=1 SV=5	ROA1_HUMAN	LFIGGLSFETTDESLR	0.997
LAT3-S262+UV	S262+uv1 (F003694)	Heterogeneous nuclear ribonucleoproteins A2/B1 OS=Homo sapiens OX=9606 GN=HNRNPA2B1 PE=1 SV=2	ROA2_HUMAN	DYFEEYGKIDTIEIITDR	0.995
LAT3-S262+UV	S262+uv1 (F003694)	Heterogeneous nuclear ribonucleoproteins A2/B1 OS=Homo sapiens OX=9606 GN=HNRNPA2B1 PE=1 SV=2	ROA2_HUMAN	GFGFVTFDDHDPVDKIVLQK	0.981
LAT3-S262+UV	S262+uv1 (F003694)	Heterogeneous nuclear ribonucleoproteins A2/B1 OS=Homo sapiens OX=9606 GN=HNRNPA2B1 PE=1 SV=2	ROA2_HUMAN	GFGFVTFSSMAEVDAAMAARPHSIDGR	0.997
LAT3-S262+UV	S262+uv1 (F003694)	Heterogeneous nuclear ribonucleoproteins A2/B1 OS=Homo sapiens OX=9606 GN=HNRNPA2B1 PE=1 SV=2	ROA2_HUMAN	KLFIGGLSFETTEESLR	0.997
LAT3-S262+UV	S262+uv1 (F003694)	Heterogeneous nuclear ribonucleoproteins A2/B1 OS=Homo sapiens OX=9606 GN=HNRNPA2B1 PE=1 SV=2	ROA2_HUMAN	LFIGGLSFETTEESLR	0.997
LAT3-S262+UV	S262+uv1 (F003694)	Heterogeneous nuclear ribonucleoproteins A2/B1 OS=Homo sapiens OX=9606 GN=HNRNPA2B1 PE=1 SV=2	ROA2_HUMAN	SRGFGFVTFSSMAEVDAAMAARPHSIDGR	0.997
LAT3-S262+UV	S262+uv2 (F003695)	Heterogeneous nuclear ribonucleoproteins A2/B1 OS=Homo sapiens OX=9606 GN=HNRNPA2B1 PE=1 SV=2	ROA2_HUMAN	DYFEEYGKIDTIEIITDR	0.997
LAT3-S262+UV	S262+uv2 (F003695)	Heterogeneous nuclear ribonucleoproteins A2/B1 OS=Homo sapiens OX=9606 GN=HNRNPA2B1 PE=1 SV=2	ROA2_HUMAN	GFGFVTFSSMAEVDAAMAARPHSIDGR	0.997
LAT3-S262+UV	S262+uv2 (F003695)	Heterogeneous nuclear ribonucleoproteins A2/B1 OS=Homo sapiens OX=9606 GN=HNRNPA2B1 PE=1 SV=2	ROA2_HUMAN	KLFIGGLSFETTEESLR	0.997
LAT3-S262+UV	S262+uv2 (F003695)	Heterogeneous nuclear ribonucleoproteins A2/B1 OS=Homo sapiens OX=9606 GN=HNRNPA2B1 PE=1 SV=2	ROA2_HUMAN	LFIGGLSFETTEESLR	0.997
LAT3-S262+UV	S262+uv2 (F003695)	Heterogeneous nuclear ribonucleoproteins A2/B1 OS=Homo sapiens OX=9606 GN=HNRNPA2B1 PE=1 SV=2	ROA2_HUMAN	SRGFGFVTFSSMAEVDAAMAARPHSIDGR	0.997
LAT3-S262+UV	S262+UV3 (F003696)	Heterogeneous nuclear ribonucleoproteins A2/B1 OS=Homo sapiens OX=9606 GN=HNRNPA2B1 PE=1 SV=2	ROA2_HUMAN	DYFEEYGKIDTIEIITDR	0.997
LAT3-S262+UV	S262+UV3 (F003696)	Heterogeneous nuclear ribonucleoproteins A2/B1 OS=Homo sapiens OX=9606 GN=HNRNPA2B1 PE=1 SV=2	ROA2_HUMAN	GFGFVTFSSMAEVDAAMAARPHSIDGR	0.997
LAT3-S262+UV	S262+UV3 (F003696)	Heterogeneous nuclear ribonucleoproteins A2/B1 OS=Homo sapiens OX=9606 GN=HNRNPA2B1 PE=1 SV=2	ROA2_HUMAN	KLFIGGLSFETTEESLR	0.997
LAT3-S262+UV	S262+UV3 (F003696)	Heterogeneous nuclear ribonucleoproteins A2/B1 OS=Homo sapiens OX=9606 GN=HNRNPA2B1 PE=1 SV=2	ROA2_HUMAN	LFIGGLSFETTEESLR	0.997
LAT3-S262+UV	S262+UV3 (F003696)	Heterogeneous nuclear ribonucleoproteins A2/B1 OS=Homo sapiens OX=9606 GN=HNRNPA2B1 PE=1 SV=2	ROA2_HUMAN	LFIGGLSFETTEESLRNYYEQWGK	0.997
LAT3-S262+UV	S262+UV3 (F003696)	Heterogeneous nuclear ribonucleoproteins A2/B1 OS=Homo sapiens OX=9606 GN=HNRNPA2B1 PE=1 SV=2	ROA2_HUMAN	SRGFGFVTFSSMAEVDAAMAARPHSIDGR	0.997
LAT3-S262+UV	S262+UV4 (F003697)	Heterogeneous nuclear ribonucleoproteins A2/B1 OS=Homo sapiens OX=9606 GN=HNRNPA2B1 PE=1 SV=2	ROA2_HUMAN	DYFEEYGKIDTIEIITDR	0.997
LAT3-S262+UV	S262+UV4 (F003697)	Heterogeneous nuclear ribonucleoproteins A2/B1 OS=Homo sapiens OX=9606 GN=HNRNPA2B1 PE=1 SV=2	ROA2_HUMAN	GFGFVTFSSMAEVDAAMAARPHSIDGR	0.997
LAT3-S262+UV	S262+UV4 (F003697)	Heterogeneous nuclear ribonucleoproteins A2/B1 OS=Homo sapiens OX=9606 GN=HNRNPA2B1 PE=1 SV=2	ROA2_HUMAN	KLFIGGLSFETTEESLR	0.997
LAT3-S262+UV	S262+UV4 (F003697)	Heterogeneous nuclear ribonucleoproteins A2/B1 OS=Homo sapiens OX=9606 GN=HNRNPA2B1 PE=1 SV=2	ROA2_HUMAN	LFIGGLSFETTEESLR	0.997
LAT3-S262+UV	S262+UV4 (F003697)	Heterogeneous nuclear ribonucleoproteins A2/B1 OS=Homo sapiens OX=9606 GN=HNRNPA2B1 PE=1 SV=2	ROA2_HUMAN	LFIGGLSFETTEESLRNYYEQWGK	0.997
LAT3-S262+UV	S262+UV4 (F003697)	Heterogeneous nuclear ribonucleoproteins A2/B1 OS=Homo sapiens OX=9606 GN=HNRNPA2B1 PE=1 SV=2	ROA2_HUMAN	SRGFGFVTFSSMAEVDAAMAARPHSIDGR	0.997
LAT3-S262+UV	s262+uv5 (F003698)	Heterogeneous nuclear ribonucleoproteins A2/B1 OS=Homo sapiens OX=9606 GN=HNRNPA2B1 PE=1 SV=2	ROA2_HUMAN	DYFEEYGKIDTIEIITDR	0.997
LAT3-S262+UV	s262+uv5 (F003698)	Heterogeneous nuclear ribonucleoproteins A2/B1 OS=Homo sapiens OX=9606 GN=HNRNPA2B1 PE=1 SV=2	ROA2_HUMAN	GFGFVTFSSMAEVDAAMAARPHSIDGR	0.997
LAT3-S262+UV	s262+uv5 (F003698)	Heterogeneous nuclear ribonucleoproteins A2/B1 OS=Homo sapiens OX=9606 GN=HNRNPA2B1 PE=1 SV=2	ROA2_HUMAN	KLFIGGLSFETTEESLR	0.997
LAT3-S262+UV	s262+uv5 (F003698)	Heterogeneous nuclear ribonucleoproteins A2/B1 OS=Homo sapiens OX=9606 GN=HNRNPA2B1 PE=1 SV=2	ROA2_HUMAN	LFIGGLSFETTEESLR	0.997
LAT3-S262+UV	s262+uv5 (F003698)	Heterogeneous nuclear ribonucleoproteins A2/B1 OS=Homo sapiens OX=9606 GN=HNRNPA2B1 PE=1 SV=2	ROA2_HUMAN	LFIGGLSFETTEESLRNYYEQWGK	0.997
LAT3-S262+UV	s262+uv5 (F003698)	Heterogeneous nuclear ribonucleoproteins A2/B1 OS=Homo sapiens OX=9606 GN=HNRNPA2B1 PE=1 SV=2	ROA2_HUMAN	SRGFGFVTFSSMAEVDAAMAARPHSIDGR	0.997
LAT3-S262-UV	S262-UV1 (F003699)	Heterogeneous nuclear ribonucleoproteins A2/B1 OS=Homo sapiens OX=9606 GN=HNRNPA2B1 PE=1 SV=2	ROA2_HUMAN	GFGFVTFSSMAEVDAAMAARPHSIDGR	0.997
LAT3-S262-UV	S262-UV1 (F003699)	Heterogeneous nuclear ribonucleoproteins A2/B1 OS=Homo sapiens OX=9606 GN=HNRNPA2B1 PE=1 SV=2	ROA2_HUMAN	LFIGGLSFETTEESLR	0.997
LAT3-S262-UV	S262-UV1 (F003699)	Heterogeneous nuclear ribonucleoproteins A2/B1 OS=Homo sapiens OX=9606 GN=HNRNPA2B1 PE=1 SV=2	ROA2_HUMAN	SRGFGFVTFSSMAEVDAAMAARPHSIDGR	0.997
LAT3-S262-UV	S262-UV2 (F003700)	Heterogeneous nuclear ribonucleoproteins A2/B1 OS=Homo sapiens OX=9606 GN=HNRNPA2B1 PE=1 SV=2	ROA2_HUMAN	DYFEEYGKIDTIEIITDR	0.997
LAT3-S262-UV	S262-UV2 (F003700)	Heterogeneous nuclear ribonucleoproteins A2/B1 OS=Homo sapiens OX=9606 GN=HNRNPA2B1 PE=1 SV=2	ROA2_HUMAN	GFGFVTFSSMAEVDAAMAARPHSIDGR	0.997
LAT3-S262-UV	S262-UV2 (F003700)	Heterogeneous nuclear ribonucleoproteins A2/B1 OS=Homo sapiens OX=9606 GN=HNRNPA2B1 PE=1 SV=2	ROA2_HUMAN	KLFIGGLSFETTEESLR	0.975
LAT3-S262-UV	S262-UV2 (F003700)	Heterogeneous nuclear ribonucleoproteins A2/B1 OS=Homo sapiens OX=9606 GN=HNRNPA2B1 PE=1 SV=2	ROA2_HUMAN	LFIGGLSFETTEESLR	0.997
LAT3-S262-UV	S262-UV2 (F003700)	Heterogeneous nuclear ribonucleoproteins A2/B1 OS=Homo sapiens OX=9606 GN=HNRNPA2B1 PE=1 SV=2	ROA2_HUMAN	LFIGGLSFETTEESLRNYYEQWGK	0.997
LAT3-S262-UV	S262-UV2 (F003700)	Heterogeneous nuclear ribonucleoproteins A2/B1 OS=Homo sapiens OX=9606 GN=HNRNPA2B1 PE=1 SV=2	ROA2_HUMAN	SRGFGFVTFSSMAEVDAAMAARPHSIDGR	0.997
LAT3-S262-UV	S262-UV3 (F003701)	Heterogeneous nuclear ribonucleoproteins A2/B1 OS=Homo sapiens OX=9606 GN=HNRNPA2B1 PE=1 SV=2	ROA2_HUMAN	DYFEEYGKIDTIEIITDR	0.997
LAT3-S262-UV	S262-UV3 (F003701)	Heterogeneous nuclear ribonucleoproteins A2/B1 OS=Homo sapiens OX=9606 GN=HNRNPA2B1 PE=1 SV=2	ROA2_HUMAN	GFGFVTFSSMAEVDAAMAARPHSIDGR	0.997
LAT3-S262-UV	S262-UV3 (F003701)	Heterogeneous nuclear ribonucleoproteins A2/B1 OS=Homo sapiens OX=9606 GN=HNRNPA2B1 PE=1 SV=2	ROA2_HUMAN	KLFIGGLSFETTEESLR	0.997
LAT3-S262-UV	S262-UV3 (F003701)	Heterogeneous nuclear ribonucleoproteins A2/B1 OS=Homo sapiens OX=9606 GN=HNRNPA2B1 PE=1 SV=2	ROA2_HUMAN	LFIGGLSFETTEESLR	0.997
LAT3-S262-UV	S262-UV3 (F003701)	Heterogeneous nuclear ribonucleoproteins A2/B1 OS=Homo sapiens OX=9606 GN=HNRNPA2B1 PE=1 SV=2	ROA2_HUMAN	LFIGGLSFETTEESLRNYYEQWGK	0.979
LAT3-S262-UV	S262-UV3 (F003701)	Heterogeneous nuclear ribonucleoproteins A2/B1 OS=Homo sapiens OX=9606 GN=HNRNPA2B1 PE=1 SV=2	ROA2_HUMAN	SRGFGFVTFSSMAEVDAAMAARPHSIDGR	0.997
LAT3-S262-UV	S262-UV4 (F003702)	Heterogeneous nuclear ribonucleoproteins A2/B1 OS=Homo sapiens OX=9606 GN=HNRNPA2B1 PE=1 SV=2	ROA2_HUMAN	DYFEEYGKIDTIEIITDR	0.997
LAT3-S262-UV	S262-UV4 (F003702)	Heterogeneous nuclear ribonucleoproteins A2/B1 OS=Homo sapiens OX=9606 GN=HNRNPA2B1 PE=1 SV=2	ROA2_HUMAN	GFGFVTFSSMAEVDAAMAARPHSIDGR	0.997
LAT3-S262-UV	S262-UV4 (F003702)	Heterogeneous nuclear ribonucleoproteins A2/B1 OS=Homo sapiens OX=9606 GN=HNRNPA2B1 PE=1 SV=2	ROA2_HUMAN	KLFIGGLSFETTEESLR	0.997
LAT3-S262-UV	S262-UV4 (F003702)	Heterogeneous nuclear ribonucleoproteins A2/B1 OS=Homo sapiens OX=9606 GN=HNRNPA2B1 PE=1 SV=2	ROA2_HUMAN	LFIGGLSFETTEESLR	0.997
LAT3-S262-UV	S262-UV4 (F003702)	Heterogeneous nuclear ribonucleoproteins A2/B1 OS=Homo sapiens OX=9606 GN=HNRNPA2B1 PE=1 SV=2	ROA2_HUMAN	LFIGGLSFETTEESLRNYYEQWGK	0.984
LAT3-S262-UV	S262-UV5 (F003703)	Heterogeneous nuclear ribonucleoproteins A2/B1 OS=Homo sapiens OX=9606 GN=HNRNPA2B1 PE=1 SV=2	ROA2_HUMAN	DYFEEYGKIDTIEIITDR	0.997
LAT3-S262-UV	S262-UV5 (F003703)	Heterogeneous nuclear ribonucleoproteins A2/B1 OS=Homo sapiens OX=9606 GN=HNRNPA2B1 PE=1 SV=2	ROA2_HUMAN	GFGFVTFSSMAEVDAAMAARPHSIDGR	0.997
LAT3-S262-UV	S262-UV5 (F003703)	Heterogeneous nuclear ribonucleoproteins A2/B1 OS=Homo sapiens OX=9606 GN=HNRNPA2B1 PE=1 SV=2	ROA2_HUMAN	KLFIGGLSFETTEESLR	0.997
LAT3-S262-UV	S262-UV5 (F003703)	Heterogeneous nuclear ribonucleoproteins A2/B1 OS=Homo sapiens OX=9606 GN=HNRNPA2B1 PE=1 SV=2	ROA2_HUMAN	LFIGGLSFETTEESLR	0.997
LAT3-S262-UV	S262-UV5 (F003703)	Heterogeneous nuclear ribonucleoproteins A2/B1 OS=Homo sapiens OX=9606 GN=HNRNPA2B1 PE=1 SV=2	ROA2_HUMAN	LFIGGLSFETTEESLRNYYEQWGK	0.986
LAT3-S262+UV	S262+uv1 (F003694)	Heterogeneous nuclear ribonucleoprotein A3 OS=Homo sapiens OX=9606 GN=HNRNPA3 PE=1 SV=2	ROA3_HUMAN	GFAFVTFDDHDTVDKIVVQK	0.978
LAT3-S262+UV	S262+uv1 (F003694)	Heterogeneous nuclear ribonucleoprotein A3 OS=Homo sapiens OX=9606 GN=HNRNPA3 PE=1 SV=2	ROA3_HUMAN	GFGFVTYSCVEEVDAAMCARPHKVDGR	0.997
LAT3-S262+UV	S262+uv2 (F003695)	Heterogeneous nuclear ribonucleoprotein A3 OS=Homo sapiens OX=9606 GN=HNRNPA3 PE=1 SV=2	ROA3_HUMAN	GFGFVTYSCVEEVDAAMCARPHKVDGR	0.997
LAT3-S262+UV	S262+UV3 (F003696)	Heterogeneous nuclear ribonucleoprotein A3 OS=Homo sapiens OX=9606 GN=HNRNPA3 PE=1 SV=2	ROA3_HUMAN	GFAFVTFDDHDTVDKIVVQK	0.996
LAT3-S262+UV	S262+UV3 (F003696)	Heterogeneous nuclear ribonucleoprotein A3 OS=Homo sapiens OX=9606 GN=HNRNPA3 PE=1 SV=2	ROA3_HUMAN	GFGFVTYSCVEEVDAAMCARPHKVDGR	0.997
LAT3-S262+UV	S262+UV4 (F003697)	Heterogeneous nuclear ribonucleoprotein A3 OS=Homo sapiens OX=9606 GN=HNRNPA3 PE=1 SV=2	ROA3_HUMAN	GFAFVTFDDHDTVDKIVVQK	0.955
LAT3-S262+UV	S262+UV4 (F003697)	Heterogeneous nuclear ribonucleoprotein A3 OS=Homo sapiens OX=9606 GN=HNRNPA3 PE=1 SV=2	ROA3_HUMAN	GFGFVTYSCVEEVDAAMCARPHKVDGR	0.997
LAT3-S262+UV	s262+uv5 (F003698)	Heterogeneous nuclear ribonucleoprotein A3 OS=Homo sapiens OX=9606 GN=HNRNPA3 PE=1 SV=2	ROA3_HUMAN	GFGFVTYSCVEEVDAAMCARPHKVDGR	0.997
LAT3-S262-UV	S262-UV1 (F003699)	Heterogeneous nuclear ribonucleoprotein A3 OS=Homo sapiens OX=9606 GN=HNRNPA3 PE=1 SV=2	ROA3_HUMAN	GFGFVTYSCVEEVDAAMCARPHKVDGR	0.993
LAT3-S262-UV	S262-UV3 (F003701)	Heterogeneous nuclear ribonucleoprotein A3 OS=Homo sapiens OX=9606 GN=HNRNPA3 PE=1 SV=2	ROA3_HUMAN	GFGFVTYSCVEEVDAAMCARPHKVDGR	0.997
LAT3-S262+UV	S262+uv1 (F003694)	40S ribosomal protein S3a OS=Homo sapiens OX=9606 GN=RPS3A PE=1 SV=2	RS3A_HUMAN	VFEVSLADLQNDEVAFR	0.997
LAT3-S262+UV	S262+uv2 (F003695)	40S ribosomal protein S3a OS=Homo sapiens OX=9606 GN=RPS3A PE=1 SV=2	RS3A_HUMAN	VFEVSLADLQNDEVAFR	0.997
LAT3-S262+UV	S262+UV4 (F003697)	40S ribosomal protein S3a OS=Homo sapiens OX=9606 GN=RPS3A PE=1 SV=2	RS3A_HUMAN	VFEVSLADLQNDEVAFR	0.997
LAT3-S262+UV	s262+uv5 (F003698)	40S ribosomal protein S3a OS=Homo sapiens OX=9606 GN=RPS3A PE=1 SV=2	RS3A_HUMAN	VFEVSLADLQNDEVAFR	0.997
LAT3-S262-UV	S262-UV2 (F003700)	40S ribosomal protein S3a OS=Homo sapiens OX=9606 GN=RPS3A PE=1 SV=2	RS3A_HUMAN	VFEVSLADLQNDEVAFR	0.997
LAT3-S262-UV	S262-UV3 (F003701)	40S ribosomal protein S3a OS=Homo sapiens OX=9606 GN=RPS3A PE=1 SV=2	RS3A_HUMAN	GRVFEVSLADLQNDEVAFR	0.969
LAT3-S262-UV	S262-UV3 (F003701)	40S ribosomal protein S3a OS=Homo sapiens OX=9606 GN=RPS3A PE=1 SV=2	RS3A_HUMAN	VFEVSLADLQNDEVAFR	0.997
LAT3-S262-UV	S262-UV4 (F003702)	40S ribosomal protein S3a OS=Homo sapiens OX=9606 GN=RPS3A PE=1 SV=2	RS3A_HUMAN	VFEVSLADLQNDEVAFR	0.997
LAT3-S262-UV	S262-UV5 (F003703)	40S ribosomal protein S3a OS=Homo sapiens OX=9606 GN=RPS3A PE=1 SV=2	RS3A_HUMAN	GRVFEVSLADLQNDEVAFR	0.997
LAT3-S262-UV	S262-UV5 (F003703)	40S ribosomal protein S3a OS=Homo sapiens OX=9606 GN=RPS3A PE=1 SV=2	RS3A_HUMAN	VFEVSLADLQNDEVAFR	0.997
LAT3-S262+UV	S262+uv1 (F003694)	40S ribosomal protein S5 OS=Homo sapiens OX=9606 GN=RPS5 PE=1 SV=4	RS5_HUMAN	HAFEIIHLLTGENPLQVLVNAIINSGPREDSTR	0.997
LAT3-S262+UV	S262+uv1 (F003694)	40S ribosomal protein S5 OS=Homo sapiens OX=9606 GN=RPS5 PE=1 SV=4	RS5_HUMAN	IVKHAFEIIHLLTGENPLQVLVNAIINSGPREDSTR	0.997
LAT3-S262+UV	S262+UV3 (F003696)	40S ribosomal protein S5 OS=Homo sapiens OX=9606 GN=RPS5 PE=1 SV=4	RS5_HUMAN	HAFEIIHLLTGENPLQVLVNAIINSGPREDSTR	0.997
LAT3-S262+UV	S262+UV4 (F003697)	40S ribosomal protein S5 OS=Homo sapiens OX=9606 GN=RPS5 PE=1 SV=4	RS5_HUMAN	HAFEIIHLLTGENPLQVLVNAIINSGPREDSTR	0.997
LAT3-S262+UV	S262+UV4 (F003697)	40S ribosomal protein S5 OS=Homo sapiens OX=9606 GN=RPS5 PE=1 SV=4	RS5_HUMAN	IVKHAFEIIHLLTGENPLQVLVNAIINSGPREDSTR	0.997
LAT3-S262+UV	s262+uv5 (F003698)	40S ribosomal protein S5 OS=Homo sapiens OX=9606 GN=RPS5 PE=1 SV=4	RS5_HUMAN	IVKHAFEIIHLLTGENPLQVLVNAIINSGPREDSTR	0.997
LAT3-S262-UV	S262-UV3 (F003701)	40S ribosomal protein S5 OS=Homo sapiens OX=9606 GN=RPS5 PE=1 SV=4	RS5_HUMAN	HAFEIIHLLTGENPLQVLVNAIINSGPREDSTR	0.997
LAT3-S262+UV	S262+uv1 (F003694)	Splicing factor 3B subunit 1 OS=Homo sapiens OX=9606 GN=SF3B1 PE=1 SV=3	SF3B1_HUMAN	AFAVVASALGIPSLLPFLK	0.997
LAT3-S262+UV	S262+uv1 (F003694)	Splicing factor 3B subunit 1 OS=Homo sapiens OX=9606 GN=SF3B1 PE=1 SV=3	SF3B1_HUMAN	TISALAIAALAEAATPYGIESFDSVLKPLWK	0.997
LAT3-S262+UV	S262+uv2 (F003695)	Splicing factor 3B subunit 1 OS=Homo sapiens OX=9606 GN=SF3B1 PE=1 SV=3	SF3B1_HUMAN	AFAVVASALGIPSLLPFLK	0.997
LAT3-S262+UV	S262+uv2 (F003695)	Splicing factor 3B subunit 1 OS=Homo sapiens OX=9606 GN=SF3B1 PE=1 SV=3	SF3B1_HUMAN	TISALAIAALAEAATPYGIESFDSVLKPLWK	0.997
LAT3-S262+UV	S262+UV3 (F003696)	Splicing factor 3B subunit 1 OS=Homo sapiens OX=9606 GN=SF3B1 PE=1 SV=3	SF3B1_HUMAN	AFAVVASALGIPSLLPFLK	0.997
LAT3-S262+UV	S262+UV3 (F003696)	Splicing factor 3B subunit 1 OS=Homo sapiens OX=9606 GN=SF3B1 PE=1 SV=3	SF3B1_HUMAN	TISALAIAALAEAATPYGIESFDSVLKPLWK	0.997
LAT3-S262+UV	S262+UV4 (F003697)	Splicing factor 3B subunit 1 OS=Homo sapiens OX=9606 GN=SF3B1 PE=1 SV=3	SF3B1_HUMAN	AFAVVASALGIPSLLPFLK	0.997
LAT3-S262+UV	S262+UV4 (F003697)	Splicing factor 3B subunit 1 OS=Homo sapiens OX=9606 GN=SF3B1 PE=1 SV=3	SF3B1_HUMAN	EFGAGPLFNQILPLLMSPTLEDQERHLLVK	0.997
LAT3-S262+UV	S262+UV4 (F003697)	Splicing factor 3B subunit 1 OS=Homo sapiens OX=9606 GN=SF3B1 PE=1 SV=3	SF3B1_HUMAN	TISALAIAALAEAATPYGIESFDSVLKPLWK	0.997
LAT3-S262+UV	s262+uv5 (F003698)	Splicing factor 3B subunit 1 OS=Homo sapiens OX=9606 GN=SF3B1 PE=1 SV=3	SF3B1_HUMAN	AFAVVASALGIPSLLPFLK	0.997
LAT3-S262+UV	s262+uv5 (F003698)	Splicing factor 3B subunit 1 OS=Homo sapiens OX=9606 GN=SF3B1 PE=1 SV=3	SF3B1_HUMAN	TISALAIAALAEAATPYGIESFDSVLKPLWK	0.997
LAT3-S262-UV	S262-UV1 (F003699)	Splicing factor 3B subunit 1 OS=Homo sapiens OX=9606 GN=SF3B1 PE=1 SV=3	SF3B1_HUMAN	AFAVVASALGIPSLLPFLK	0.997
LAT3-S262-UV	S262-UV1 (F003699)	Splicing factor 3B subunit 1 OS=Homo sapiens OX=9606 GN=SF3B1 PE=1 SV=3	SF3B1_HUMAN	TISALAIAALAEAATPYGIESFDSVLKPLWK	0.997
LAT3-S262-UV	S262-UV2 (F003700)	Splicing factor 3B subunit 1 OS=Homo sapiens OX=9606 GN=SF3B1 PE=1 SV=3	SF3B1_HUMAN	AFAVVASALGIPSLLPFLK	0.997
LAT3-S262-UV	S262-UV2 (F003700)	Splicing factor 3B subunit 1 OS=Homo sapiens OX=9606 GN=SF3B1 PE=1 SV=3	SF3B1_HUMAN	IYNSIYIGSQDALIAHYPR	0.997
LAT3-S262-UV	S262-UV2 (F003700)	Splicing factor 3B subunit 1 OS=Homo sapiens OX=9606 GN=SF3B1 PE=1 SV=3	SF3B1_HUMAN	TISALAIAALAEAATPYGIESFDSVLKPLWK	0.997
LAT3-S262-UV	S262-UV3 (F003701)	Splicing factor 3B subunit 1 OS=Homo sapiens OX=9606 GN=SF3B1 PE=1 SV=3	SF3B1_HUMAN	AFAVVASALGIPSLLPFLK	0.997
LAT3-S262-UV	S262-UV3 (F003701)	Splicing factor 3B subunit 1 OS=Homo sapiens OX=9606 GN=SF3B1 PE=1 SV=3	SF3B1_HUMAN	TISALAIAALAEAATPYGIESFDSVLKPLWK	0.997
LAT3-S262-UV	S262-UV4 (F003702)	Splicing factor 3B subunit 1 OS=Homo sapiens OX=9606 GN=SF3B1 PE=1 SV=3	SF3B1_HUMAN	AFAVVASALGIPSLLPFLK	0.997
LAT3-S262-UV	S262-UV4 (F003702)	Splicing factor 3B subunit 1 OS=Homo sapiens OX=9606 GN=SF3B1 PE=1 SV=3	SF3B1_HUMAN	TISALAIAALAEAATPYGIESFDSVLKPLWK	0.997
LAT3-S262-UV	S262-UV5 (F003703)	Splicing factor 3B subunit 1 OS=Homo sapiens OX=9606 GN=SF3B1 PE=1 SV=3	SF3B1_HUMAN	AFAVVASALGIPSLLPFLK	0.997
LAT3-S262-UV	S262-UV5 (F003703)	Splicing factor 3B subunit 1 OS=Homo sapiens OX=9606 GN=SF3B1 PE=1 SV=3	SF3B1_HUMAN	TISALAIAALAEAATPYGIESFDSVLKPLWK	0.997
LAT3-S262+UV	S262+uv1 (F003694)	Small nuclear ribonucleoprotein Sm D1 OS=Homo sapiens OX=9606 GN=SNRPD1 PE=1 SV=1	SMD1_HUMAN	YFILPDSLPLDTLLVDVEPK	0.997
LAT3-S262+UV	S262+uv2 (F003695)	Small nuclear ribonucleoprotein Sm D1 OS=Homo sapiens OX=9606 GN=SNRPD1 PE=1 SV=1	SMD1_HUMAN	YFILPDSLPLDTLLVDVEPK	0.997
LAT3-S262+UV	S262+UV3 (F003696)	Small nuclear ribonucleoprotein Sm D1 OS=Homo sapiens OX=9606 GN=SNRPD1 PE=1 SV=1	SMD1_HUMAN	YFILPDSLPLDTLLVDVEPK	0.997
LAT3-S262+UV	S262+UV4 (F003697)	Small nuclear ribonucleoprotein Sm D1 OS=Homo sapiens OX=9606 GN=SNRPD1 PE=1 SV=1	SMD1_HUMAN	YFILPDSLPLDTLLVDVEPK	0.997
LAT3-S262+UV	s262+uv5 (F003698)	Small nuclear ribonucleoprotein Sm D1 OS=Homo sapiens OX=9606 GN=SNRPD1 PE=1 SV=1	SMD1_HUMAN	YFILPDSLPLDTLLVDVEPK	0.997
LAT3-S262-UV	S262-UV1 (F003699)	Small nuclear ribonucleoprotein Sm D1 OS=Homo sapiens OX=9606 GN=SNRPD1 PE=1 SV=1	SMD1_HUMAN	YFILPDSLPLDTLLVDVEPK	0.997
LAT3-S262-UV	S262-UV1 (F003699)	Small nuclear ribonucleoprotein Sm D1 OS=Homo sapiens OX=9606 GN=SNRPD1 PE=1 SV=1	SMD1_HUMAN	YFILPDSLPLDTLLVDVEPKVK	0.952
LAT3-S262-UV	S262-UV2 (F003700)	Small nuclear ribonucleoprotein Sm D1 OS=Homo sapiens OX=9606 GN=SNRPD1 PE=1 SV=1	SMD1_HUMAN	YFILPDSLPLDTLLVDVEPK	0.997
LAT3-S262-UV	S262-UV3 (F003701)	Small nuclear ribonucleoprotein Sm D1 OS=Homo sapiens OX=9606 GN=SNRPD1 PE=1 SV=1	SMD1_HUMAN	YFILPDSLPLDTLLVDVEPK	0.997
LAT3-S262-UV	S262-UV4 (F003702)	Small nuclear ribonucleoprotein Sm D1 OS=Homo sapiens OX=9606 GN=SNRPD1 PE=1 SV=1	SMD1_HUMAN	YFILPDSLPLDTLLVDVEPK	0.997
LAT3-S262-UV	S262-UV5 (F003703)	Small nuclear ribonucleoprotein Sm D1 OS=Homo sapiens OX=9606 GN=SNRPD1 PE=1 SV=1	SMD1_HUMAN	YFILPDSLPLDTLLVDVEPK	0.997
LAT3-S262+UV	S262+uv2 (F003695)	Tubulin alpha-1B chain OS=Homo sapiens OX=9606 GN=TUBA1B PE=1 SV=1	TBA1B_HUMAN	AYHEQLSVAEITNACFEPANQMVK	0.993
LAT3-S262+UV	S262+UV4 (F003697)	Tubulin alpha-1B chain OS=Homo sapiens OX=9606 GN=TUBA1B PE=1 SV=1	TBA1B_HUMAN	AVCMLSNTTAIAEAWAR	0.997
LAT3-S262-UV	S262-UV2 (F003700)	Tubulin alpha-1B chain OS=Homo sapiens OX=9606 GN=TUBA1B PE=1 SV=1	TBA1B_HUMAN	AVCMLSNTTAIAEAWAR	0.997
LAT3-S262-UV	S262-UV2 (F003700)	Tubulin alpha-1B chain OS=Homo sapiens OX=9606 GN=TUBA1B PE=1 SV=1	TBA1B_HUMAN	AYHEQLSVAEITNACFEPANQMVK	0.997
LAT3-S262-UV	S262-UV2 (F003700)	Tubulin alpha-1B chain OS=Homo sapiens OX=9606 GN=TUBA1B PE=1 SV=1	TBA1B_HUMAN	NLDIERPTYTNLNRLISQIVSSITASLR	0.953
LAT3-S262-UV	S262-UV3 (F003701)	Tubulin alpha-1B chain OS=Homo sapiens OX=9606 GN=TUBA1B PE=1 SV=1	TBA1B_HUMAN	AVCMLSNTTAIAEAWAR	0.997
LAT3-S262-UV	S262-UV3 (F003701)	Tubulin alpha-1B chain OS=Homo sapiens OX=9606 GN=TUBA1B PE=1 SV=1	TBA1B_HUMAN	KLADQCTGLQGFLVFHSFGGGTGSGFTSLLMER	0.984
LAT3-S262-UV	S262-UV4 (F003702)	Tubulin alpha-1B chain OS=Homo sapiens OX=9606 GN=TUBA1B PE=1 SV=1	TBA1B_HUMAN	AVCMLSNTTAIAEAWAR	0.997
LAT3-S262-UV	S262-UV4 (F003702)	Tubulin alpha-1B chain OS=Homo sapiens OX=9606 GN=TUBA1B PE=1 SV=1	TBA1B_HUMAN	AYHEQLSVAEITNACFEPANQMVK	0.997
LAT3-S262-UV	S262-UV5 (F003703)	Tubulin alpha-1B chain OS=Homo sapiens OX=9606 GN=TUBA1B PE=1 SV=1	TBA1B_HUMAN	AVCMLSNTTAIAEAWAR	0.997
LAT3-S262-UV	S262-UV5 (F003703)	Tubulin alpha-1B chain OS=Homo sapiens OX=9606 GN=TUBA1B PE=1 SV=1	TBA1B_HUMAN	AYHEQLSVAEITNACFEPANQMVK	0.993
LAT3-S262-UV	S262-UV5 (F003703)	Tubulin alpha-1B chain OS=Homo sapiens OX=9606 GN=TUBA1B PE=1 SV=1	TBA1B_HUMAN	LISQIVSSITASLR	0.99
LAT3-S262+UV	S262+uv1 (F003694)	U5 small nuclear ribonucleoprotein 200 kDa helicase OS=Homo sapiens OX=9606 GN=SNRNP200 PE=1 SV=2	U520_HUMAN	ETYEVLLSFIQAALGDQPR	0.997
LAT3-S262+UV	S262+uv2 (F003695)	U5 small nuclear ribonucleoprotein 200 kDa helicase OS=Homo sapiens OX=9606 GN=SNRNP200 PE=1 SV=2	U520_HUMAN	ETYEVLLSFIQAALGDQPR	0.997
LAT3-S262+UV	S262+UV3 (F003696)	U5 small nuclear ribonucleoprotein 200 kDa helicase OS=Homo sapiens OX=9606 GN=SNRNP200 PE=1 SV=2	U520_HUMAN	ETYEVLLSFIQAALGDQPR	0.997
LAT3-S262+UV	S262+UV3 (F003696)	U5 small nuclear ribonucleoprotein 200 kDa helicase OS=Homo sapiens OX=9606 GN=SNRNP200 PE=1 SV=2	U520_HUMAN	TLVEDLFADKHIQVLVSTATLAWGVNLPAHTVIIK	0.992
LAT3-S262+UV	S262+UV4 (F003697)	U5 small nuclear ribonucleoprotein 200 kDa helicase OS=Homo sapiens OX=9606 GN=SNRNP200 PE=1 SV=2	U520_HUMAN	CVYITPMEALAEQVYMDWYEKFQDRLNK	0.997
LAT3-S262+UV	S262+UV4 (F003697)	U5 small nuclear ribonucleoprotein 200 kDa helicase OS=Homo sapiens OX=9606 GN=SNRNP200 PE=1 SV=2	U520_HUMAN	ETYEVLLSFIQAALGDQPR	0.997
LAT3-S262+UV	S262+UV4 (F003697)	U5 small nuclear ribonucleoprotein 200 kDa helicase OS=Homo sapiens OX=9606 GN=SNRNP200 PE=1 SV=2	U520_HUMAN	TLVEDLFADKHIQVLVSTATLAWGVNLPAHTVIIK	0.99
LAT3-S262+UV	s262+uv5 (F003698)	U5 small nuclear ribonucleoprotein 200 kDa helicase OS=Homo sapiens OX=9606 GN=SNRNP200 PE=1 SV=2	U520_HUMAN	ETYEVLLSFIQAALGDQPR	0.997
LAT3-S262-UV	S262-UV1 (F003699)	U5 small nuclear ribonucleoprotein 200 kDa helicase OS=Homo sapiens OX=9606 GN=SNRNP200 PE=1 SV=2	U520_HUMAN	ETYEVLLSFIQAALGDQPR	0.997
LAT3-S262-UV	S262-UV2 (F003700)	U5 small nuclear ribonucleoprotein 200 kDa helicase OS=Homo sapiens OX=9606 GN=SNRNP200 PE=1 SV=2	U520_HUMAN	ETYEVLLSFIQAALGDQPR	0.997
LAT3-S262-UV	S262-UV3 (F003701)	U5 small nuclear ribonucleoprotein 200 kDa helicase OS=Homo sapiens OX=9606 GN=SNRNP200 PE=1 SV=2	U520_HUMAN	ETYEVLLSFIQAALGDQPR	0.997
LAT3-S262-UV	S262-UV4 (F003702)	U5 small nuclear ribonucleoprotein 200 kDa helicase OS=Homo sapiens OX=9606 GN=SNRNP200 PE=1 SV=2	U520_HUMAN	ETYEVLLSFIQAALGDQPR	0.997
LAT3-S262-UV	S262-UV5 (F003703)	U5 small nuclear ribonucleoprotein 200 kDa helicase OS=Homo sapiens OX=9606 GN=SNRNP200 PE=1 SV=2	U520_HUMAN	ETYEVLLSFIQAALGDQPR	0.997
LAT3-S262+UV	S262+uv1 (F003694)	116 kDa U5 small nuclear ribonucleoprotein component OS=Homo sapiens OX=9606 GN=EFTUD2 PE=1 SV=1	U5S1_HUMAN	ISDGVVLFIDAAEGVMLNTER	0.997
LAT3-S262+UV	S262+uv1 (F003694)	116 kDa U5 small nuclear ribonucleoprotein component OS=Homo sapiens OX=9606 GN=EFTUD2 PE=1 SV=1	U5S1_HUMAN	SIWAFGPDATGPNILVDDTLPSEVDKALLGSVK	0.997
LAT3-S262+UV	S262+uv2 (F003695)	116 kDa U5 small nuclear ribonucleoprotein component OS=Homo sapiens OX=9606 GN=EFTUD2 PE=1 SV=1	U5S1_HUMAN	ISDGVVLFIDAAEGVMLNTER	0.997
LAT3-S262+UV	S262+UV3 (F003696)	116 kDa U5 small nuclear ribonucleoprotein component OS=Homo sapiens OX=9606 GN=EFTUD2 PE=1 SV=1	U5S1_HUMAN	ISDGVVLFIDAAEGVMLNTER	0.997
LAT3-S262+UV	S262+UV3 (F003696)	116 kDa U5 small nuclear ribonucleoprotein component OS=Homo sapiens OX=9606 GN=EFTUD2 PE=1 SV=1	U5S1_HUMAN	KFTLMEQTLPVTVYEMDFLADLMDNSELIR	0.966
LAT3-S262+UV	S262+UV4 (F003697)	116 kDa U5 small nuclear ribonucleoprotein component OS=Homo sapiens OX=9606 GN=EFTUD2 PE=1 SV=1	U5S1_HUMAN	ISDGVVLFIDAAEGVMLNTER	0.997
LAT3-S262+UV	S262+UV4 (F003697)	116 kDa U5 small nuclear ribonucleoprotein component OS=Homo sapiens OX=9606 GN=EFTUD2 PE=1 SV=1	U5S1_HUMAN	KFTLMEQTLPVTVYEMDFLADLMDNSELIR	0.997
LAT3-S262+UV	S262+UV4 (F003697)	116 kDa U5 small nuclear ribonucleoprotein component OS=Homo sapiens OX=9606 GN=EFTUD2 PE=1 SV=1	U5S1_HUMAN	SIWAFGPDATGPNILVDDTLPSEVDKALLGSVK	0.997
LAT3-S262+UV	S262+UV4 (F003697)	116 kDa U5 small nuclear ribonucleoprotein component OS=Homo sapiens OX=9606 GN=EFTUD2 PE=1 SV=1	U5S1_HUMAN	VADPVVTFCETVVETSSLK	0.997
LAT3-S262+UV	s262+uv5 (F003698)	116 kDa U5 small nuclear ribonucleoprotein component OS=Homo sapiens OX=9606 GN=EFTUD2 PE=1 SV=1	U5S1_HUMAN	ISDGVVLFIDAAEGVMLNTER	0.997
LAT3-S262+UV	s262+uv5 (F003698)	116 kDa U5 small nuclear ribonucleoprotein component OS=Homo sapiens OX=9606 GN=EFTUD2 PE=1 SV=1	U5S1_HUMAN	KFTLMEQTLPVTVYEMDFLADLMDNSELIR	0.997
LAT3-S262+UV	s262+uv5 (F003698)	116 kDa U5 small nuclear ribonucleoprotein component OS=Homo sapiens OX=9606 GN=EFTUD2 PE=1 SV=1	U5S1_HUMAN	VADPVVTFCETVVETSSLK	0.997
LAT3-S262-UV	S262-UV1 (F003699)	116 kDa U5 small nuclear ribonucleoprotein component OS=Homo sapiens OX=9606 GN=EFTUD2 PE=1 SV=1	U5S1_HUMAN	ISDGVVLFIDAAEGVMLNTER	0.997
LAT3-S262-UV	S262-UV2 (F003700)	116 kDa U5 small nuclear ribonucleoprotein component OS=Homo sapiens OX=9606 GN=EFTUD2 PE=1 SV=1	U5S1_HUMAN	ISDGVVLFIDAAEGVMLNTER	0.997
LAT3-S262-UV	S262-UV2 (F003700)	116 kDa U5 small nuclear ribonucleoprotein component OS=Homo sapiens OX=9606 GN=EFTUD2 PE=1 SV=1	U5S1_HUMAN	KFTLMEQTLPVTVYEMDFLADLMDNSELIR	0.997
LAT3-S262-UV	S262-UV3 (F003701)	116 kDa U5 small nuclear ribonucleoprotein component OS=Homo sapiens OX=9606 GN=EFTUD2 PE=1 SV=1	U5S1_HUMAN	ISDGVVLFIDAAEGVMLNTER	0.997
LAT3-S262-UV	S262-UV5 (F003703)	116 kDa U5 small nuclear ribonucleoprotein component OS=Homo sapiens OX=9606 GN=EFTUD2 PE=1 SV=1	U5S1_HUMAN	ISDGVVLFIDAAEGVMLNTER	0.997
LAT3-S262+UV	S262+uv1 (F003694)	Vimentin OS=Homo sapiens OX=9606 GN=VIM PE=1 SV=4	VIME_HUMAN	LLQDSVDFSLADAINTEFKNTR	0.989
LAT3-S262+UV	S262+UV3 (F003696)	Vimentin OS=Homo sapiens OX=9606 GN=VIM PE=1 SV=4	VIME_HUMAN	LLQDSVDFSLADAINTEFK	0.997
LAT3-S262+UV	S262+UV4 (F003697)	Vimentin OS=Homo sapiens OX=9606 GN=VIM PE=1 SV=4	VIME_HUMAN	LLQDSVDFSLADAINTEFK	0.997
LAT3-S262+UV	S262+UV4 (F003697)	Vimentin OS=Homo sapiens OX=9606 GN=VIM PE=1 SV=4	VIME_HUMAN	LLQDSVDFSLADAINTEFKNTR	0.997
LAT3-S262+UV	s262+uv5 (F003698)	Vimentin OS=Homo sapiens OX=9606 GN=VIM PE=1 SV=4	VIME_HUMAN	LLQDSVDFSLADAINTEFKNTR	0.982
LAT3-S262-UV	S262-UV2 (F003700)	Vimentin OS=Homo sapiens OX=9606 GN=VIM PE=1 SV=4	VIME_HUMAN	LLQDSVDFSLADAINTEFKNTR	0.997
LAT3-S262-UV	S262-UV3 (F003701)	Vimentin OS=Homo sapiens OX=9606 GN=VIM PE=1 SV=4	VIME_HUMAN	LLQDSVDFSLADAINTEFKNTR	0.991
LAT3-S262-UV	S262-UV5 (F003703)	Vimentin OS=Homo sapiens OX=9606 GN=VIM PE=1 SV=4	VIME_HUMAN	LLQDSVDFSLADAINTEFKNTR	0.997
LAT3-S262+UV	S262+uv1 (F003694)	X-ray repair cross-complementing protein 5 OS=Homo sapiens OX=9606 GN=XRCC5 PE=1 SV=3	XRCC5_HUMAN	IQPGSQQADFLDALIVSMDVIQHETIGK	0.997
LAT3-S262+UV	S262+UV4 (F003697)	X-ray repair cross-complementing protein 5 OS=Homo sapiens OX=9606 GN=XRCC5 PE=1 SV=3	XRCC5_HUMAN	VFAARDDEAAAVALSSLIHALDDLDMVAIVR	0.997
LAT3-S262+UV	s262+uv5 (F003698)	X-ray repair cross-complementing protein 5 OS=Homo sapiens OX=9606 GN=XRCC5 PE=1 SV=3	XRCC5_HUMAN	QVFAENKDEIALVLFGTDGTDNPLSGGDQYQNITVHR	0.996
LAT3-S262+UV	s262+uv5 (F003698)	X-ray repair cross-complementing protein 5 OS=Homo sapiens OX=9606 GN=XRCC5 PE=1 SV=3	XRCC5_HUMAN	VFAARDDEAAAVALSSLIHALDDLDMVAIVR	0.997
LAT3-S262-UV	S262-UV1 (F003699)	X-ray repair cross-complementing protein 5 OS=Homo sapiens OX=9606 GN=XRCC5 PE=1 SV=3	XRCC5_HUMAN	QLNHFWEIVVQDGITLITKEEASGSSVTAEEAK	0.993
LAT3-S262-UV	S262-UV1 (F003699)	X-ray repair cross-complementing protein 5 OS=Homo sapiens OX=9606 GN=XRCC5 PE=1 SV=3	XRCC5_HUMAN	VFAARDDEAAAVALSSLIHALDDLDMVAIVR	0.997
LAT3-S262-UV	S262-UV2 (F003700)	X-ray repair cross-complementing protein 5 OS=Homo sapiens OX=9606 GN=XRCC5 PE=1 SV=3	XRCC5_HUMAN	ASFEEASNQLINHIEQFLDTNETPYFMK	0.997
LAT3-S262-UV	S262-UV2 (F003700)	X-ray repair cross-complementing protein 5 OS=Homo sapiens OX=9606 GN=XRCC5 PE=1 SV=3	XRCC5_HUMAN	QVFAENKDEIALVLFGTDGTDNPLSGGDQYQNITVHR	0.997
LAT3-S262-UV	S262-UV2 (F003700)	X-ray repair cross-complementing protein 5 OS=Homo sapiens OX=9606 GN=XRCC5 PE=1 SV=3	XRCC5_HUMAN	VFAARDDEAAAVALSSLIHALDDLDMVAIVR	0.997
LAT3-S262-UV	S262-UV3 (F003701)	X-ray repair cross-complementing protein 5 OS=Homo sapiens OX=9606 GN=XRCC5 PE=1 SV=3	XRCC5_HUMAN	ASFEEASNQLINHIEQFLDTNETPYFMK	0.997
LAT3-S262-UV	S262-UV3 (F003701)	X-ray repair cross-complementing protein 5 OS=Homo sapiens OX=9606 GN=XRCC5 PE=1 SV=3	XRCC5_HUMAN	QVFAENKDEIALVLFGTDGTDNPLSGGDQYQNITVHR	0.997
LAT3-S262-UV	S262-UV3 (F003701)	X-ray repair cross-complementing protein 5 OS=Homo sapiens OX=9606 GN=XRCC5 PE=1 SV=3	XRCC5_HUMAN	VFAARDDEAAAVALSSLIHALDDLDMVAIVR	0.997
LAT3-S262-UV	S262-UV4 (F003702)	X-ray repair cross-complementing protein 5 OS=Homo sapiens OX=9606 GN=XRCC5 PE=1 SV=3	XRCC5_HUMAN	QVFAENKDEIALVLFGTDGTDNPLSGGDQYQNITVHR	0.984
LAT3-S262-UV	S262-UV4 (F003702)	X-ray repair cross-complementing protein 5 OS=Homo sapiens OX=9606 GN=XRCC5 PE=1 SV=3	XRCC5_HUMAN	VFAARDDEAAAVALSSLIHALDDLDMVAIVR	0.997
LAT3-S262-UV	S262-UV5 (F003703)	X-ray repair cross-complementing protein 5 OS=Homo sapiens OX=9606 GN=XRCC5 PE=1 SV=3	XRCC5_HUMAN	ASFEEASNQLINHIEQFLDTNETPYFMK	0.997
LAT3-S262-UV	S262-UV5 (F003703)	X-ray repair cross-complementing protein 5 OS=Homo sapiens OX=9606 GN=XRCC5 PE=1 SV=3	XRCC5_HUMAN	QVFAENKDEIALVLFGTDGTDNPLSGGDQYQNITVHR	0.997
LAT3-S262-UV	S262-UV5 (F003703)	X-ray repair cross-complementing protein 5 OS=Homo sapiens OX=9606 GN=XRCC5 PE=1 SV=3	XRCC5_HUMAN	VFAARDDEAAAVALSSLIHALDDLDMVAIVR	0.997
