# Supplementary material for: Optoproteomics elucidates the interactome of L-type amino acid transporter 3 (LAT3)
Source: Royal Society of Chemistry journal article supplement (doi:10.1039/d0cc08423a), 2021-01-01
Supplement: d0cc08423a2.xlsx [file d0cc08423a2.xlsx]

## Sheet: Complete peptide Report_LAT3-S2
Biological sample name	MS/MS sample name	Protein name	Protein accession numbers	Peptide sequence	Best Peptide identification probability
LAT3-S267+UV	S267+UV1 (F003704)	ADP/ATP translocase 2 OS=Homo sapiens OX=9606 GN=SLC25A5 PE=1 SV=7	ADT2_HUMAN	GMLPDPKNTHIVISWMIAQTVTAVAGLTSYPFDTVR	0.95
LAT3-S267+UV	S267+UV2 (F003705)	ADP/ATP translocase 2 OS=Homo sapiens OX=9606 GN=SLC25A5 PE=1 SV=7	ADT2_HUMAN	GMLPDPKNTHIVISWMIAQTVTAVAGLTSYPFDTVR	0.95
LAT3-S267+UV	S267+UV2 (F003705)	ADP/ATP translocase 2 OS=Homo sapiens OX=9606 GN=SLC25A5 PE=1 SV=7	ADT2_HUMAN	NTHIVISWMIAQTVTAVAGLTSYPFDTVRR	0.95
LAT3-S267+UV	S267+UV3 (F003706)	ADP/ATP translocase 2 OS=Homo sapiens OX=9606 GN=SLC25A5 PE=1 SV=7	ADT2_HUMAN	GMLPDPKNTHIVISWMIAQTVTAVAGLTSYPFDTVR	0.95
LAT3-S267+UV	S267+UV3 (F003706)	ADP/ATP translocase 2 OS=Homo sapiens OX=9606 GN=SLC25A5 PE=1 SV=7	ADT2_HUMAN	NTHIVISWMIAQTVTAVAGLTSYPFDTVR	0.95
LAT3-S267+UV	S267+UV4 (F003707)	ADP/ATP translocase 2 OS=Homo sapiens OX=9606 GN=SLC25A5 PE=1 SV=7	ADT2_HUMAN	TDAAVSFAKDFLAGGVAAAISK	0.95
LAT3-S267+UV	S267+UV5 (F003708)	ADP/ATP translocase 2 OS=Homo sapiens OX=9606 GN=SLC25A5 PE=1 SV=7	ADT2_HUMAN	TDAAVSFAKDFLAGGVAAAISK	0.95
LAT3-S267-UV	S267-UV5 (F003713)	ADP/ATP translocase 2 OS=Homo sapiens OX=9606 GN=SLC25A5 PE=1 SV=7	ADT2_HUMAN	TDAAVSFAKDFLAGGVAAAISK	0.95
LAT3-S267-UV	S267-UV2 (F003710)	A-kinase anchor protein 1, mitochondrial OS=Homo sapiens OX=9606 GN=AKAP1 PE=1 SV=1	AKAP1_HUMAN	AAFQIISQVISEATEQVLATTVGK	0.95
LAT3-S267-UV	S267-UV5 (F003713)	A-kinase anchor protein 1, mitochondrial OS=Homo sapiens OX=9606 GN=AKAP1 PE=1 SV=1	AKAP1_HUMAN	AAFQIISQVISEATEQVLATTVGK	0.95
LAT3-S267-UV	S267-UV5 (F003713)	A-kinase anchor protein 1, mitochondrial OS=Homo sapiens OX=9606 GN=AKAP1 PE=1 SV=1	AKAP1_HUMAN	AAFQIISQVISEATEQVLATTVGKVAGR	0.95
LAT3-S267+UV	S267+UV1 (F003704)	Rabankyrin-5 OS=Homo sapiens OX=9606 GN=ANKFY1 PE=1 SV=2	ANFY1_HUMAN	GADMSVPDEKGNPPLWLALANNLEDIASTLVR	0.95
LAT3-S267+UV	S267+UV2 (F003705)	Rabankyrin-5 OS=Homo sapiens OX=9606 GN=ANKFY1 PE=1 SV=2	ANFY1_HUMAN	GADMSVPDEKGNPPLWLALANNLEDIASTLVR	0.95
LAT3-S267+UV	S267+UV3 (F003706)	Rabankyrin-5 OS=Homo sapiens OX=9606 GN=ANKFY1 PE=1 SV=2	ANFY1_HUMAN	GADMSVPDEKGNPPLWLALANNLEDIASTLVR	0.95
LAT3-S267+UV	S267+UV4 (F003707)	Rabankyrin-5 OS=Homo sapiens OX=9606 GN=ANKFY1 PE=1 SV=2	ANFY1_HUMAN	GADMSVPDEKGNPPLWLALANNLEDIASTLVR	0.95
LAT3-S267-UV	S267-UV1 (F003709_1)	Rabankyrin-5 OS=Homo sapiens OX=9606 GN=ANKFY1 PE=1 SV=2	ANFY1_HUMAN	GADMSVPDEKGNPPLWLALANNLEDIASTLVR	0.95
LAT3-S267-UV	S267-UV1 (F003709_1)	Rabankyrin-5 OS=Homo sapiens OX=9606 GN=ANKFY1 PE=1 SV=2	ANFY1_HUMAN	HSADVMSEMAQIAEALLQAGANPNMQDSK	0.95
LAT3-S267-UV	S267-UV2 (F003710)	Rabankyrin-5 OS=Homo sapiens OX=9606 GN=ANKFY1 PE=1 SV=2	ANFY1_HUMAN	GADMSVPDEKGNPPLWLALANNLEDIASTLVR	0.95
LAT3-S267-UV	S267-UV3 (F003711)	Rabankyrin-5 OS=Homo sapiens OX=9606 GN=ANKFY1 PE=1 SV=2	ANFY1_HUMAN	GADMSVPDEKGNPPLWLALANNLEDIASTLVR	0.95
LAT3-S267-UV	S267-UV3 (F003711)	Rabankyrin-5 OS=Homo sapiens OX=9606 GN=ANKFY1 PE=1 SV=2	ANFY1_HUMAN	HSADVMSEMAQIAEALLQAGANPNMQDSK	0.95
LAT3-S267-UV	S267-UV4 (F003712)	Rabankyrin-5 OS=Homo sapiens OX=9606 GN=ANKFY1 PE=1 SV=2	ANFY1_HUMAN	GADMSVPDEKGNPPLWLALANNLEDIASTLVR	0.95
LAT3-S267-UV	S267-UV4 (F003712)	Rabankyrin-5 OS=Homo sapiens OX=9606 GN=ANKFY1 PE=1 SV=2	ANFY1_HUMAN	HSADVMSEMAQIAEALLQAGANPNMQDSK	0.95
LAT3-S267-UV	S267-UV5 (F003713)	Rabankyrin-5 OS=Homo sapiens OX=9606 GN=ANKFY1 PE=1 SV=2	ANFY1_HUMAN	GADMSVPDEKGNPPLWLALANNLEDIASTLVR	0.95
LAT3-S267-UV	S267-UV5 (F003713)	Rabankyrin-5 OS=Homo sapiens OX=9606 GN=ANKFY1 PE=1 SV=2	ANFY1_HUMAN	HSADVMSEMAQIAEALLQAGANPNMQDSK	0.95
LAT3-S267+UV	S267+UV1 (F003704)	Cleavage and polyadenylation specificity factor subunit 6 OS=Homo sapiens OX=9606 GN=CPSF6 PE=1 SV=2	CPSF6_HUMAN	AVSDASAGDYGSAIETLVTAISLIK	0.95
LAT3-S267+UV	S267+UV2 (F003705)	Cleavage and polyadenylation specificity factor subunit 6 OS=Homo sapiens OX=9606 GN=CPSF6 PE=1 SV=2	CPSF6_HUMAN	AVSDASAGDYGSAIETLVTAISLIK	0.95
LAT3-S267+UV	S267+UV3 (F003706)	Cleavage and polyadenylation specificity factor subunit 6 OS=Homo sapiens OX=9606 GN=CPSF6 PE=1 SV=2	CPSF6_HUMAN	AVSDASAGDYGSAIETLVTAISLIK	0.95
LAT3-S267+UV	S267+UV4 (F003707)	Cleavage and polyadenylation specificity factor subunit 6 OS=Homo sapiens OX=9606 GN=CPSF6 PE=1 SV=2	CPSF6_HUMAN	AVSDASAGDYGSAIETLVTAISLIK	0.95
LAT3-S267+UV	S267+UV5 (F003708)	Cleavage and polyadenylation specificity factor subunit 6 OS=Homo sapiens OX=9606 GN=CPSF6 PE=1 SV=2	CPSF6_HUMAN	AVSDASAGDYGSAIETLVTAISLIK	0.95
LAT3-S267-UV	S267-UV1 (F003709_1)	Cleavage and polyadenylation specificity factor subunit 6 OS=Homo sapiens OX=9606 GN=CPSF6 PE=1 SV=2	CPSF6_HUMAN	AVSDASAGDYGSAIETLVTAISLIK	0.95
LAT3-S267-UV	S267-UV2 (F003710)	Cleavage and polyadenylation specificity factor subunit 6 OS=Homo sapiens OX=9606 GN=CPSF6 PE=1 SV=2	CPSF6_HUMAN	AVSDASAGDYGSAIETLVTAISLIK	0.95
LAT3-S267-UV	S267-UV3 (F003711)	Cleavage and polyadenylation specificity factor subunit 6 OS=Homo sapiens OX=9606 GN=CPSF6 PE=1 SV=2	CPSF6_HUMAN	AVSDASAGDYGSAIETLVTAISLIK	0.95
LAT3-S267-UV	S267-UV3 (F003711)	Cleavage and polyadenylation specificity factor subunit 6 OS=Homo sapiens OX=9606 GN=CPSF6 PE=1 SV=2	CPSF6_HUMAN	AVSDASAGDYGSAIETLVTAISLIKQSK	0.95
LAT3-S267-UV	S267-UV4 (F003712)	Cleavage and polyadenylation specificity factor subunit 6 OS=Homo sapiens OX=9606 GN=CPSF6 PE=1 SV=2	CPSF6_HUMAN	AVSDASAGDYGSAIETLVTAISLIK	0.95
LAT3-S267-UV	S267-UV5 (F003713)	Cleavage and polyadenylation specificity factor subunit 6 OS=Homo sapiens OX=9606 GN=CPSF6 PE=1 SV=2	CPSF6_HUMAN	AVSDASAGDYGSAIETLVTAISLIK	0.95
LAT3-S267+UV	S267+UV1 (F003704)	Cleavage and polyadenylation specificity factor subunit 7 OS=Homo sapiens OX=9606 GN=CPSF7 PE=1 SV=1	CPSF7_HUMAN	AVSGASAGDYSDAIETLLTAIAVIK	0.95
LAT3-S267+UV	S267+UV2 (F003705)	Cleavage and polyadenylation specificity factor subunit 7 OS=Homo sapiens OX=9606 GN=CPSF7 PE=1 SV=1	CPSF7_HUMAN	AVSGASAGDYSDAIETLLTAIAVIK	0.95
LAT3-S267+UV	S267+UV3 (F003706)	Cleavage and polyadenylation specificity factor subunit 7 OS=Homo sapiens OX=9606 GN=CPSF7 PE=1 SV=1	CPSF7_HUMAN	AVSGASAGDYSDAIETLLTAIAVIK	0.95
LAT3-S267+UV	S267+UV3 (F003706)	Cleavage and polyadenylation specificity factor subunit 7 OS=Homo sapiens OX=9606 GN=CPSF7 PE=1 SV=1	CPSF7_HUMAN	AVSGASAGDYSDAIETLLTAIAVIKQSR	0.95
LAT3-S267+UV	S267+UV4 (F003707)	Cleavage and polyadenylation specificity factor subunit 7 OS=Homo sapiens OX=9606 GN=CPSF7 PE=1 SV=1	CPSF7_HUMAN	AVSGASAGDYSDAIETLLTAIAVIK	0.95
LAT3-S267+UV	S267+UV5 (F003708)	Cleavage and polyadenylation specificity factor subunit 7 OS=Homo sapiens OX=9606 GN=CPSF7 PE=1 SV=1	CPSF7_HUMAN	AVSGASAGDYSDAIETLLTAIAVIK	0.95
LAT3-S267-UV	S267-UV1 (F003709_1)	Cleavage and polyadenylation specificity factor subunit 7 OS=Homo sapiens OX=9606 GN=CPSF7 PE=1 SV=1	CPSF7_HUMAN	AVSGASAGDYSDAIETLLTAIAVIK	0.95
LAT3-S267-UV	S267-UV1 (F003709_1)	Cleavage and polyadenylation specificity factor subunit 7 OS=Homo sapiens OX=9606 GN=CPSF7 PE=1 SV=1	CPSF7_HUMAN	AVSGASAGDYSDAIETLLTAIAVIKQSR	0.95
LAT3-S267-UV	S267-UV2 (F003710)	Cleavage and polyadenylation specificity factor subunit 7 OS=Homo sapiens OX=9606 GN=CPSF7 PE=1 SV=1	CPSF7_HUMAN	AVSGASAGDYSDAIETLLTAIAVIK	0.95
LAT3-S267-UV	S267-UV2 (F003710)	Cleavage and polyadenylation specificity factor subunit 7 OS=Homo sapiens OX=9606 GN=CPSF7 PE=1 SV=1	CPSF7_HUMAN	AVSGASAGDYSDAIETLLTAIAVIKQSR	0.95
LAT3-S267-UV	S267-UV3 (F003711)	Cleavage and polyadenylation specificity factor subunit 7 OS=Homo sapiens OX=9606 GN=CPSF7 PE=1 SV=1	CPSF7_HUMAN	AVSGASAGDYSDAIETLLTAIAVIK	0.95
LAT3-S267-UV	S267-UV3 (F003711)	Cleavage and polyadenylation specificity factor subunit 7 OS=Homo sapiens OX=9606 GN=CPSF7 PE=1 SV=1	CPSF7_HUMAN	AVSGASAGDYSDAIETLLTAIAVIKQSR	0.95
LAT3-S267-UV	S267-UV4 (F003712)	Cleavage and polyadenylation specificity factor subunit 7 OS=Homo sapiens OX=9606 GN=CPSF7 PE=1 SV=1	CPSF7_HUMAN	AVSGASAGDYSDAIETLLTAIAVIK	0.95
LAT3-S267-UV	S267-UV4 (F003712)	Cleavage and polyadenylation specificity factor subunit 7 OS=Homo sapiens OX=9606 GN=CPSF7 PE=1 SV=1	CPSF7_HUMAN	AVSGASAGDYSDAIETLLTAIAVIKQSR	0.95
LAT3-S267-UV	S267-UV5 (F003713)	Cleavage and polyadenylation specificity factor subunit 7 OS=Homo sapiens OX=9606 GN=CPSF7 PE=1 SV=1	CPSF7_HUMAN	AVSGASAGDYSDAIETLLTAIAVIK	0.95
LAT3-S267-UV	S267-UV5 (F003713)	Cleavage and polyadenylation specificity factor subunit 7 OS=Homo sapiens OX=9606 GN=CPSF7 PE=1 SV=1	CPSF7_HUMAN	AVSGASAGDYSDAIETLLTAIAVIKQSR	0.95
LAT3-S267+UV	S267+UV1 (F003704)	ATP-dependent RNA helicase DDX3X OS=Homo sapiens OX=9606 GN=DDX3X PE=1 SV=3	DDX3X_HUMAN	DLMACAQTGSGKTAAFLLPILSQIYSDGPGEALR	0.95
LAT3-S267+UV	S267+UV1 (F003704)	ATP-dependent RNA helicase DDX3X OS=Homo sapiens OX=9606 GN=DDX3X PE=1 SV=3	DDX3X_HUMAN	ELAVQIYEEAR	0.95
LAT3-S267+UV	S267+UV1 (F003704)	ATP-dependent RNA helicase DDX3X OS=Homo sapiens OX=9606 GN=DDX3X PE=1 SV=3	DDX3X_HUMAN	SFLLDLLNATGKDSLTLVFVETK	0.95
LAT3-S267+UV	S267+UV1 (F003704)	ATP-dependent RNA helicase DDX3X OS=Homo sapiens OX=9606 GN=DDX3X PE=1 SV=3	DDX3X_HUMAN	TAAFLLPILSQIYSDGPGEALR	0.95
LAT3-S267+UV	S267+UV2 (F003705)	ATP-dependent RNA helicase DDX3X OS=Homo sapiens OX=9606 GN=DDX3X PE=1 SV=3	DDX3X_HUMAN	DLMACAQTGSGKTAAFLLPILSQIYSDGPGEALR	0.95
LAT3-S267+UV	S267+UV2 (F003705)	ATP-dependent RNA helicase DDX3X OS=Homo sapiens OX=9606 GN=DDX3X PE=1 SV=3	DDX3X_HUMAN	ELAVQIYEEAR	0.95
LAT3-S267+UV	S267+UV2 (F003705)	ATP-dependent RNA helicase DDX3X OS=Homo sapiens OX=9606 GN=DDX3X PE=1 SV=3	DDX3X_HUMAN	SFLLDLLNATGKDSLTLVFVETK	0.95
LAT3-S267+UV	S267+UV2 (F003705)	ATP-dependent RNA helicase DDX3X OS=Homo sapiens OX=9606 GN=DDX3X PE=1 SV=3	DDX3X_HUMAN	TAAFLLPILSQIYSDGPGEALR	0.95
LAT3-S267+UV	S267+UV3 (F003706)	ATP-dependent RNA helicase DDX3X OS=Homo sapiens OX=9606 GN=DDX3X PE=1 SV=3	DDX3X_HUMAN	DLMACAQTGSGKTAAFLLPILSQIYSDGPGEALR	0.95
LAT3-S267+UV	S267+UV3 (F003706)	ATP-dependent RNA helicase DDX3X OS=Homo sapiens OX=9606 GN=DDX3X PE=1 SV=3	DDX3X_HUMAN	SFLLDLLNATGKDSLTLVFVETK	0.95
LAT3-S267+UV	S267+UV4 (F003707)	ATP-dependent RNA helicase DDX3X OS=Homo sapiens OX=9606 GN=DDX3X PE=1 SV=3	DDX3X_HUMAN	ELAVQIYEEAR	0.95
LAT3-S267+UV	S267+UV4 (F003707)	ATP-dependent RNA helicase DDX3X OS=Homo sapiens OX=9606 GN=DDX3X PE=1 SV=3	DDX3X_HUMAN	SFLLDLLNATGKDSLTLVFVETK	0.95
LAT3-S267+UV	S267+UV4 (F003707)	ATP-dependent RNA helicase DDX3X OS=Homo sapiens OX=9606 GN=DDX3X PE=1 SV=3	DDX3X_HUMAN	TAAFLLPILSQIYSDGPGEALR	0.95
LAT3-S267+UV	S267+UV5 (F003708)	ATP-dependent RNA helicase DDX3X OS=Homo sapiens OX=9606 GN=DDX3X PE=1 SV=3	DDX3X_HUMAN	SFLLDLLNATGKDSLTLVFVETK	0.95
LAT3-S267+UV	S267+UV5 (F003708)	ATP-dependent RNA helicase DDX3X OS=Homo sapiens OX=9606 GN=DDX3X PE=1 SV=3	DDX3X_HUMAN	TAAFLLPILSQIYSDGPGEALR	0.95
LAT3-S267-UV	S267-UV1 (F003709_1)	ATP-dependent RNA helicase DDX3X OS=Homo sapiens OX=9606 GN=DDX3X PE=1 SV=3	DDX3X_HUMAN	SFLLDLLNATGKDSLTLVFVETK	0.95
LAT3-S267-UV	S267-UV1 (F003709_1)	ATP-dependent RNA helicase DDX3X OS=Homo sapiens OX=9606 GN=DDX3X PE=1 SV=3	DDX3X_HUMAN	TAAFLLPILSQIYSDGPGEALR	0.95
LAT3-S267-UV	S267-UV2 (F003710)	ATP-dependent RNA helicase DDX3X OS=Homo sapiens OX=9606 GN=DDX3X PE=1 SV=3	DDX3X_HUMAN	ELAVQIYEEAR	0.95
LAT3-S267-UV	S267-UV2 (F003710)	ATP-dependent RNA helicase DDX3X OS=Homo sapiens OX=9606 GN=DDX3X PE=1 SV=3	DDX3X_HUMAN	SFLLDLLNATGKDSLTLVFVETK	0.95
LAT3-S267-UV	S267-UV2 (F003710)	ATP-dependent RNA helicase DDX3X OS=Homo sapiens OX=9606 GN=DDX3X PE=1 SV=3	DDX3X_HUMAN	TAAFLLPILSQIYSDGPGEALR	0.95
LAT3-S267-UV	S267-UV3 (F003711)	ATP-dependent RNA helicase DDX3X OS=Homo sapiens OX=9606 GN=DDX3X PE=1 SV=3	DDX3X_HUMAN	SFLLDLLNATGKDSLTLVFVETK	0.95
LAT3-S267-UV	S267-UV3 (F003711)	ATP-dependent RNA helicase DDX3X OS=Homo sapiens OX=9606 GN=DDX3X PE=1 SV=3	DDX3X_HUMAN	TAAFLLPILSQIYSDGPGEALR	0.95
LAT3-S267-UV	S267-UV4 (F003712)	ATP-dependent RNA helicase DDX3X OS=Homo sapiens OX=9606 GN=DDX3X PE=1 SV=3	DDX3X_HUMAN	ELAVQIYEEAR	0.95
LAT3-S267-UV	S267-UV4 (F003712)	ATP-dependent RNA helicase DDX3X OS=Homo sapiens OX=9606 GN=DDX3X PE=1 SV=3	DDX3X_HUMAN	SFLLDLLNATGKDSLTLVFVETK	0.95
LAT3-S267-UV	S267-UV4 (F003712)	ATP-dependent RNA helicase DDX3X OS=Homo sapiens OX=9606 GN=DDX3X PE=1 SV=3	DDX3X_HUMAN	TAAFLLPILSQIYSDGPGEALR	0.95
LAT3-S267-UV	S267-UV5 (F003713)	ATP-dependent RNA helicase DDX3X OS=Homo sapiens OX=9606 GN=DDX3X PE=1 SV=3	DDX3X_HUMAN	DLMACAQTGSGKTAAFLLPILSQIYSDGPGEALR	0.95
LAT3-S267-UV	S267-UV5 (F003713)	ATP-dependent RNA helicase DDX3X OS=Homo sapiens OX=9606 GN=DDX3X PE=1 SV=3	DDX3X_HUMAN	SFLLDLLNATGKDSLTLVFVETK	0.95
LAT3-S267-UV	S267-UV5 (F003713)	ATP-dependent RNA helicase DDX3X OS=Homo sapiens OX=9606 GN=DDX3X PE=1 SV=3	DDX3X_HUMAN	TAAFLLPILSQIYSDGPGEALR	0.95
LAT3-S267+UV	S267+UV2 (F003705)	ATP-dependent RNA helicase DDX50 OS=Homo sapiens OX=9606 GN=DDX50 PE=1 SV=1	DDX50_HUMAN	SLITSDKGFVTMTLESLEEIQDVSCAWK	0.95
LAT3-S267+UV	S267+UV2 (F003705)	ATP-dependent RNA helicase DDX50 OS=Homo sapiens OX=9606 GN=DDX50 PE=1 SV=1	DDX50_HUMAN	SLITSDKGFVTMTLESLEEIQDVSCAWKELNR	0.95
LAT3-S267+UV	S267+UV3 (F003706)	ATP-dependent RNA helicase DDX50 OS=Homo sapiens OX=9606 GN=DDX50 PE=1 SV=1	DDX50_HUMAN	SLITSDKGFVTMTLESLEEIQDVSCAWK	0.95
LAT3-S267+UV	S267+UV3 (F003706)	ATP-dependent RNA helicase DDX50 OS=Homo sapiens OX=9606 GN=DDX50 PE=1 SV=1	DDX50_HUMAN	SLITSDKGFVTMTLESLEEIQDVSCAWKELNR	0.95
LAT3-S267+UV	S267+UV4 (F003707)	ATP-dependent RNA helicase DDX50 OS=Homo sapiens OX=9606 GN=DDX50 PE=1 SV=1	DDX50_HUMAN	SLITSDKGFVTMTLESLEEIQDVSCAWK	0.95
LAT3-S267+UV	S267+UV1 (F003704)	ATP-dependent RNA helicase A OS=Homo sapiens OX=9606 GN=DHX9 PE=1 SV=4	DHX9_HUMAN	AIEPPPLDAVIEAEHTLRELDALDANDELTPLGR	0.95
LAT3-S267+UV	S267+UV1 (F003704)	ATP-dependent RNA helicase A OS=Homo sapiens OX=9606 GN=DHX9 PE=1 SV=4	DHX9_HUMAN	DINTDFLLVVLRDVVQAYPEVR	0.95
LAT3-S267+UV	S267+UV1 (F003704)	ATP-dependent RNA helicase A OS=Homo sapiens OX=9606 GN=DHX9 PE=1 SV=4	DHX9_HUMAN	ELLPVKKFESEILEAISQNSVVIIR	0.95
LAT3-S267+UV	S267+UV1 (F003704)	ATP-dependent RNA helicase A OS=Homo sapiens OX=9606 GN=DHX9 PE=1 SV=4	DHX9_HUMAN	FGKMMIMGCIFYVGDAICTIAAATCFPEPFINEGKR	0.95
LAT3-S267+UV	S267+UV1 (F003704)	ATP-dependent RNA helicase A OS=Homo sapiens OX=9606 GN=DHX9 PE=1 SV=4	DHX9_HUMAN	GMTLVTPLQLLLFASK	0.95
LAT3-S267+UV	S267+UV1 (F003704)	ATP-dependent RNA helicase A OS=Homo sapiens OX=9606 GN=DHX9 PE=1 SV=4	DHX9_HUMAN	KEEQEVQATLESEEVDLNAGLHGNWTLENAK	0.95
LAT3-S267+UV	S267+UV1 (F003704)	ATP-dependent RNA helicase A OS=Homo sapiens OX=9606 GN=DHX9 PE=1 SV=4	DHX9_HUMAN	KFESEILEAISQNSVVIIR	0.95
LAT3-S267+UV	S267+UV1 (F003704)	ATP-dependent RNA helicase A OS=Homo sapiens OX=9606 GN=DHX9 PE=1 SV=4	DHX9_HUMAN	LSMSQLNEKETPFELIEALLKYIETLNVPGAVLVFLPGWNLIYTMQK	0.95
LAT3-S267+UV	S267+UV1 (F003704)	ATP-dependent RNA helicase A OS=Homo sapiens OX=9606 GN=DHX9 PE=1 SV=4	DHX9_HUMAN	QNQVGVVPWSPPQSNWNPWTSSNIDEGPLAFATPEQISMDLK	0.95
LAT3-S267+UV	S267+UV1 (F003704)	ATP-dependent RNA helicase A OS=Homo sapiens OX=9606 GN=DHX9 PE=1 SV=4	DHX9_HUMAN	VILSTNIAETSITINDVVYVIDSCKQK	0.95
LAT3-S267+UV	S267+UV2 (F003705)	ATP-dependent RNA helicase A OS=Homo sapiens OX=9606 GN=DHX9 PE=1 SV=4	DHX9_HUMAN	AAMEALVVEVTKQPAIISQLDPVNER	0.95
LAT3-S267+UV	S267+UV2 (F003705)	ATP-dependent RNA helicase A OS=Homo sapiens OX=9606 GN=DHX9 PE=1 SV=4	DHX9_HUMAN	AIEPPPLDAVIEAEHTLRELDALDANDELTPLGR	0.95
LAT3-S267+UV	S267+UV2 (F003705)	ATP-dependent RNA helicase A OS=Homo sapiens OX=9606 GN=DHX9 PE=1 SV=4	DHX9_HUMAN	DINTDFLLVVLRDVVQAYPEVR	0.95
LAT3-S267+UV	S267+UV2 (F003705)	ATP-dependent RNA helicase A OS=Homo sapiens OX=9606 GN=DHX9 PE=1 SV=4	DHX9_HUMAN	ELLPVKKFESEILEAISQNSVVIIR	0.95
LAT3-S267+UV	S267+UV2 (F003705)	ATP-dependent RNA helicase A OS=Homo sapiens OX=9606 GN=DHX9 PE=1 SV=4	DHX9_HUMAN	GMTLVTPLQLLLFASK	0.95
LAT3-S267+UV	S267+UV2 (F003705)	ATP-dependent RNA helicase A OS=Homo sapiens OX=9606 GN=DHX9 PE=1 SV=4	DHX9_HUMAN	KEEQEVQATLESEEVDLNAGLHGNWTLENAK	0.95
LAT3-S267+UV	S267+UV2 (F003705)	ATP-dependent RNA helicase A OS=Homo sapiens OX=9606 GN=DHX9 PE=1 SV=4	DHX9_HUMAN	KFESEILEAISQNSVVIIR	0.95
LAT3-S267+UV	S267+UV2 (F003705)	ATP-dependent RNA helicase A OS=Homo sapiens OX=9606 GN=DHX9 PE=1 SV=4	DHX9_HUMAN	QNQVGVVPWSPPQSNWNPWTSSNIDEGPLAFATPEQISMDLK	0.95
LAT3-S267+UV	S267+UV2 (F003705)	ATP-dependent RNA helicase A OS=Homo sapiens OX=9606 GN=DHX9 PE=1 SV=4	DHX9_HUMAN	VFDPVPVGVTKVILSTNIAETSITINDVVYVIDSCKQK	0.95
LAT3-S267+UV	S267+UV2 (F003705)	ATP-dependent RNA helicase A OS=Homo sapiens OX=9606 GN=DHX9 PE=1 SV=4	DHX9_HUMAN	VILSTNIAETSITINDVVYVIDSCKQK	0.95
LAT3-S267+UV	S267+UV3 (F003706)	ATP-dependent RNA helicase A OS=Homo sapiens OX=9606 GN=DHX9 PE=1 SV=4	DHX9_HUMAN	AAMEALVVEVTKQPAIISQLDPVNER	0.95
LAT3-S267+UV	S267+UV3 (F003706)	ATP-dependent RNA helicase A OS=Homo sapiens OX=9606 GN=DHX9 PE=1 SV=4	DHX9_HUMAN	AIEPPPLDAVIEAEHTLRELDALDANDELTPLGR	0.95
LAT3-S267+UV	S267+UV3 (F003706)	ATP-dependent RNA helicase A OS=Homo sapiens OX=9606 GN=DHX9 PE=1 SV=4	DHX9_HUMAN	DINTDFLLVVLRDVVQAYPEVR	0.95
LAT3-S267+UV	S267+UV3 (F003706)	ATP-dependent RNA helicase A OS=Homo sapiens OX=9606 GN=DHX9 PE=1 SV=4	DHX9_HUMAN	ELLPVKKFESEILEAISQNSVVIIR	0.95
LAT3-S267+UV	S267+UV3 (F003706)	ATP-dependent RNA helicase A OS=Homo sapiens OX=9606 GN=DHX9 PE=1 SV=4	DHX9_HUMAN	FESEILEAISQNSVVIIR	0.95
LAT3-S267+UV	S267+UV3 (F003706)	ATP-dependent RNA helicase A OS=Homo sapiens OX=9606 GN=DHX9 PE=1 SV=4	DHX9_HUMAN	GMTLVTPLQLLLFASK	0.95
LAT3-S267+UV	S267+UV3 (F003706)	ATP-dependent RNA helicase A OS=Homo sapiens OX=9606 GN=DHX9 PE=1 SV=4	DHX9_HUMAN	KEEQEVQATLESEEVDLNAGLHGNWTLENAK	0.95
LAT3-S267+UV	S267+UV3 (F003706)	ATP-dependent RNA helicase A OS=Homo sapiens OX=9606 GN=DHX9 PE=1 SV=4	DHX9_HUMAN	KFESEILEAISQNSVVIIR	0.95
LAT3-S267+UV	S267+UV3 (F003706)	ATP-dependent RNA helicase A OS=Homo sapiens OX=9606 GN=DHX9 PE=1 SV=4	DHX9_HUMAN	KVQSDGQIVLVDDWIKLQISHEAAACITGLR	0.95
LAT3-S267+UV	S267+UV3 (F003706)	ATP-dependent RNA helicase A OS=Homo sapiens OX=9606 GN=DHX9 PE=1 SV=4	DHX9_HUMAN	MMIMGCIFYVGDAICTIAAATCFPEPFINEGKR	0.95
LAT3-S267+UV	S267+UV3 (F003706)	ATP-dependent RNA helicase A OS=Homo sapiens OX=9606 GN=DHX9 PE=1 SV=4	DHX9_HUMAN	QNQVGVVPWSPPQSNWNPWTSSNIDEGPLAFATPEQISMDLK	0.95
LAT3-S267+UV	S267+UV3 (F003706)	ATP-dependent RNA helicase A OS=Homo sapiens OX=9606 GN=DHX9 PE=1 SV=4	DHX9_HUMAN	VFDPVPVGVTKVILSTNIAETSITINDVVYVIDSCKQK	0.95
LAT3-S267+UV	S267+UV3 (F003706)	ATP-dependent RNA helicase A OS=Homo sapiens OX=9606 GN=DHX9 PE=1 SV=4	DHX9_HUMAN	VILSTNIAETSITINDVVYVIDSCKQK	0.95
LAT3-S267+UV	S267+UV4 (F003707)	ATP-dependent RNA helicase A OS=Homo sapiens OX=9606 GN=DHX9 PE=1 SV=4	DHX9_HUMAN	AAMEALVVEVTKQPAIISQLDPVNER	0.95
LAT3-S267+UV	S267+UV4 (F003707)	ATP-dependent RNA helicase A OS=Homo sapiens OX=9606 GN=DHX9 PE=1 SV=4	DHX9_HUMAN	AIEPPPLDAVIEAEHTLRELDALDANDELTPLGR	0.95
LAT3-S267+UV	S267+UV4 (F003707)	ATP-dependent RNA helicase A OS=Homo sapiens OX=9606 GN=DHX9 PE=1 SV=4	DHX9_HUMAN	DINTDFLLVVLRDVVQAYPEVR	0.95
LAT3-S267+UV	S267+UV4 (F003707)	ATP-dependent RNA helicase A OS=Homo sapiens OX=9606 GN=DHX9 PE=1 SV=4	DHX9_HUMAN	ELLPVKKFESEILEAISQNSVVIIR	0.95
LAT3-S267+UV	S267+UV4 (F003707)	ATP-dependent RNA helicase A OS=Homo sapiens OX=9606 GN=DHX9 PE=1 SV=4	DHX9_HUMAN	ETPFELIEALLK	0.95
LAT3-S267+UV	S267+UV4 (F003707)	ATP-dependent RNA helicase A OS=Homo sapiens OX=9606 GN=DHX9 PE=1 SV=4	DHX9_HUMAN	GMTLVTPLQLLLFASK	0.95
LAT3-S267+UV	S267+UV4 (F003707)	ATP-dependent RNA helicase A OS=Homo sapiens OX=9606 GN=DHX9 PE=1 SV=4	DHX9_HUMAN	KEEQEVQATLESEEVDLNAGLHGNWTLENAK	0.95
LAT3-S267+UV	S267+UV4 (F003707)	ATP-dependent RNA helicase A OS=Homo sapiens OX=9606 GN=DHX9 PE=1 SV=4	DHX9_HUMAN	KFESEILEAISQNSVVIIR	0.95
LAT3-S267+UV	S267+UV4 (F003707)	ATP-dependent RNA helicase A OS=Homo sapiens OX=9606 GN=DHX9 PE=1 SV=4	DHX9_HUMAN	KVQSDGQIVLVDDWIKLQISHEAAACITGLR	0.95
LAT3-S267+UV	S267+UV4 (F003707)	ATP-dependent RNA helicase A OS=Homo sapiens OX=9606 GN=DHX9 PE=1 SV=4	DHX9_HUMAN	QNQVGVVPWSPPQSNWNPWTSSNIDEGPLAFATPEQISMDLK	0.95
LAT3-S267+UV	S267+UV4 (F003707)	ATP-dependent RNA helicase A OS=Homo sapiens OX=9606 GN=DHX9 PE=1 SV=4	DHX9_HUMAN	VILSTNIAETSITINDVVYVIDSCKQK	0.95
LAT3-S267+UV	S267+UV5 (F003708)	ATP-dependent RNA helicase A OS=Homo sapiens OX=9606 GN=DHX9 PE=1 SV=4	DHX9_HUMAN	AAMEALVVEVTKQPAIISQLDPVNER	0.95
LAT3-S267+UV	S267+UV5 (F003708)	ATP-dependent RNA helicase A OS=Homo sapiens OX=9606 GN=DHX9 PE=1 SV=4	DHX9_HUMAN	AIEPPPLDAVIEAEHTLRELDALDANDELTPLGR	0.95
LAT3-S267+UV	S267+UV5 (F003708)	ATP-dependent RNA helicase A OS=Homo sapiens OX=9606 GN=DHX9 PE=1 SV=4	DHX9_HUMAN	DINTDFLLVVLRDVVQAYPEVR	0.95
LAT3-S267+UV	S267+UV5 (F003708)	ATP-dependent RNA helicase A OS=Homo sapiens OX=9606 GN=DHX9 PE=1 SV=4	DHX9_HUMAN	ELLPVKKFESEILEAISQNSVVIIR	0.95
LAT3-S267+UV	S267+UV5 (F003708)	ATP-dependent RNA helicase A OS=Homo sapiens OX=9606 GN=DHX9 PE=1 SV=4	DHX9_HUMAN	ETPFELIEALLK	0.95
LAT3-S267+UV	S267+UV5 (F003708)	ATP-dependent RNA helicase A OS=Homo sapiens OX=9606 GN=DHX9 PE=1 SV=4	DHX9_HUMAN	GMTLVTPLQLLLFASK	0.95
LAT3-S267+UV	S267+UV5 (F003708)	ATP-dependent RNA helicase A OS=Homo sapiens OX=9606 GN=DHX9 PE=1 SV=4	DHX9_HUMAN	KEEQEVQATLESEEVDLNAGLHGNWTLENAK	0.95
LAT3-S267+UV	S267+UV5 (F003708)	ATP-dependent RNA helicase A OS=Homo sapiens OX=9606 GN=DHX9 PE=1 SV=4	DHX9_HUMAN	KFESEILEAISQNSVVIIR	0.95
LAT3-S267+UV	S267+UV5 (F003708)	ATP-dependent RNA helicase A OS=Homo sapiens OX=9606 GN=DHX9 PE=1 SV=4	DHX9_HUMAN	KVFDPVPVGVTKVILSTNIAETSITINDVVYVIDSCK	0.95
LAT3-S267+UV	S267+UV5 (F003708)	ATP-dependent RNA helicase A OS=Homo sapiens OX=9606 GN=DHX9 PE=1 SV=4	DHX9_HUMAN	QNQVGVVPWSPPQSNWNPWTSSNIDEGPLAFATPEQISMDLK	0.95
LAT3-S267+UV	S267+UV5 (F003708)	ATP-dependent RNA helicase A OS=Homo sapiens OX=9606 GN=DHX9 PE=1 SV=4	DHX9_HUMAN	VILSTNIAETSITINDVVYVIDSCKQK	0.95
LAT3-S267-UV	S267-UV1 (F003709_1)	ATP-dependent RNA helicase A OS=Homo sapiens OX=9606 GN=DHX9 PE=1 SV=4	DHX9_HUMAN	AIEPPPLDAVIEAEHTLRELDALDANDELTPLGR	0.95
LAT3-S267-UV	S267-UV1 (F003709_1)	ATP-dependent RNA helicase A OS=Homo sapiens OX=9606 GN=DHX9 PE=1 SV=4	DHX9_HUMAN	DINTDFLLVVLRDVVQAYPEVR	0.95
LAT3-S267-UV	S267-UV1 (F003709_1)	ATP-dependent RNA helicase A OS=Homo sapiens OX=9606 GN=DHX9 PE=1 SV=4	DHX9_HUMAN	ELLPVKKFESEILEAISQNSVVIIR	0.95
LAT3-S267-UV	S267-UV1 (F003709_1)	ATP-dependent RNA helicase A OS=Homo sapiens OX=9606 GN=DHX9 PE=1 SV=4	DHX9_HUMAN	KEEQEVQATLESEEVDLNAGLHGNWTLENAK	0.95
LAT3-S267-UV	S267-UV1 (F003709_1)	ATP-dependent RNA helicase A OS=Homo sapiens OX=9606 GN=DHX9 PE=1 SV=4	DHX9_HUMAN	KFESEILEAISQNSVVIIR	0.95
LAT3-S267-UV	S267-UV1 (F003709_1)	ATP-dependent RNA helicase A OS=Homo sapiens OX=9606 GN=DHX9 PE=1 SV=4	DHX9_HUMAN	QNQVGVVPWSPPQSNWNPWTSSNIDEGPLAFATPEQISMDLK	0.95
LAT3-S267-UV	S267-UV2 (F003710)	ATP-dependent RNA helicase A OS=Homo sapiens OX=9606 GN=DHX9 PE=1 SV=4	DHX9_HUMAN	AIEPPPLDAVIEAEHTLRELDALDANDELTPLGR	0.95
LAT3-S267-UV	S267-UV2 (F003710)	ATP-dependent RNA helicase A OS=Homo sapiens OX=9606 GN=DHX9 PE=1 SV=4	DHX9_HUMAN	KEEQEVQATLESEEVDLNAGLHGNWTLENAK	0.95
LAT3-S267-UV	S267-UV2 (F003710)	ATP-dependent RNA helicase A OS=Homo sapiens OX=9606 GN=DHX9 PE=1 SV=4	DHX9_HUMAN	KFESEILEAISQNSVVIIR	0.95
LAT3-S267-UV	S267-UV3 (F003711)	ATP-dependent RNA helicase A OS=Homo sapiens OX=9606 GN=DHX9 PE=1 SV=4	DHX9_HUMAN	AIEPPPLDAVIEAEHTLRELDALDANDELTPLGR	0.95
LAT3-S267-UV	S267-UV3 (F003711)	ATP-dependent RNA helicase A OS=Homo sapiens OX=9606 GN=DHX9 PE=1 SV=4	DHX9_HUMAN	DINTDFLLVVLRDVVQAYPEVR	0.95
LAT3-S267-UV	S267-UV3 (F003711)	ATP-dependent RNA helicase A OS=Homo sapiens OX=9606 GN=DHX9 PE=1 SV=4	DHX9_HUMAN	ELLPVKKFESEILEAISQNSVVIIR	0.95
LAT3-S267-UV	S267-UV3 (F003711)	ATP-dependent RNA helicase A OS=Homo sapiens OX=9606 GN=DHX9 PE=1 SV=4	DHX9_HUMAN	GMTLVTPLQLLLFASK	0.95
LAT3-S267-UV	S267-UV3 (F003711)	ATP-dependent RNA helicase A OS=Homo sapiens OX=9606 GN=DHX9 PE=1 SV=4	DHX9_HUMAN	KFESEILEAISQNSVVIIR	0.95
LAT3-S267-UV	S267-UV3 (F003711)	ATP-dependent RNA helicase A OS=Homo sapiens OX=9606 GN=DHX9 PE=1 SV=4	DHX9_HUMAN	QNQVGVVPWSPPQSNWNPWTSSNIDEGPLAFATPEQISMDLK	0.95
LAT3-S267-UV	S267-UV4 (F003712)	ATP-dependent RNA helicase A OS=Homo sapiens OX=9606 GN=DHX9 PE=1 SV=4	DHX9_HUMAN	AIEPPPLDAVIEAEHTLRELDALDANDELTPLGR	0.95
LAT3-S267-UV	S267-UV4 (F003712)	ATP-dependent RNA helicase A OS=Homo sapiens OX=9606 GN=DHX9 PE=1 SV=4	DHX9_HUMAN	DINTDFLLVVLRDVVQAYPEVR	0.95
LAT3-S267-UV	S267-UV4 (F003712)	ATP-dependent RNA helicase A OS=Homo sapiens OX=9606 GN=DHX9 PE=1 SV=4	DHX9_HUMAN	ELLPVKKFESEILEAISQNSVVIIR	0.95
LAT3-S267-UV	S267-UV4 (F003712)	ATP-dependent RNA helicase A OS=Homo sapiens OX=9606 GN=DHX9 PE=1 SV=4	DHX9_HUMAN	KFESEILEAISQNSVVIIR	0.95
LAT3-S267-UV	S267-UV4 (F003712)	ATP-dependent RNA helicase A OS=Homo sapiens OX=9606 GN=DHX9 PE=1 SV=4	DHX9_HUMAN	MMIMGCIFYVGDAICTIAAATCFPEPFINEGKR	0.948
LAT3-S267-UV	S267-UV4 (F003712)	ATP-dependent RNA helicase A OS=Homo sapiens OX=9606 GN=DHX9 PE=1 SV=4	DHX9_HUMAN	QNQVGVVPWSPPQSNWNPWTSSNIDEGPLAFATPEQISMDLK	0.95
LAT3-S267-UV	S267-UV4 (F003712)	ATP-dependent RNA helicase A OS=Homo sapiens OX=9606 GN=DHX9 PE=1 SV=4	DHX9_HUMAN	VILSTNIAETSITINDVVYVIDSCKQK	0.95
LAT3-S267-UV	S267-UV5 (F003713)	ATP-dependent RNA helicase A OS=Homo sapiens OX=9606 GN=DHX9 PE=1 SV=4	DHX9_HUMAN	AIEPPPLDAVIEAEHTLRELDALDANDELTPLGR	0.95
LAT3-S267-UV	S267-UV5 (F003713)	ATP-dependent RNA helicase A OS=Homo sapiens OX=9606 GN=DHX9 PE=1 SV=4	DHX9_HUMAN	DINTDFLLVVLRDVVQAYPEVR	0.95
LAT3-S267-UV	S267-UV5 (F003713)	ATP-dependent RNA helicase A OS=Homo sapiens OX=9606 GN=DHX9 PE=1 SV=4	DHX9_HUMAN	ELLPVKKFESEILEAISQNSVVIIR	0.95
LAT3-S267-UV	S267-UV5 (F003713)	ATP-dependent RNA helicase A OS=Homo sapiens OX=9606 GN=DHX9 PE=1 SV=4	DHX9_HUMAN	GMTLVTPLQLLLFASK	0.95
LAT3-S267-UV	S267-UV5 (F003713)	ATP-dependent RNA helicase A OS=Homo sapiens OX=9606 GN=DHX9 PE=1 SV=4	DHX9_HUMAN	KFESEILEAISQNSVVIIR	0.95
LAT3-S267-UV	S267-UV5 (F003713)	ATP-dependent RNA helicase A OS=Homo sapiens OX=9606 GN=DHX9 PE=1 SV=4	DHX9_HUMAN	QNQVGVVPWSPPQSNWNPWTSSNIDEGPLAFATPEQISMDLK	0.95
LAT3-S267-UV	S267-UV5 (F003713)	ATP-dependent RNA helicase A OS=Homo sapiens OX=9606 GN=DHX9 PE=1 SV=4	DHX9_HUMAN	VILSTNIAETSITINDVVYVIDSCKQK	0.95
LAT3-S267+UV	S267+UV1 (F003704)	Elongation factor 1-alpha 1 OS=Homo sapiens OX=9606 GN=EEF1A1 PE=1 SV=1	EF1A1_HUMAN,EF1A3_HUMAN	DFIKNMITGTSQADCAVLIVAAGVGEFEAGISK	0.95
LAT3-S267+UV	S267+UV2 (F003705)	Elongation factor 1-alpha 1 OS=Homo sapiens OX=9606 GN=EEF1A1 PE=1 SV=1	EF1A1_HUMAN,EF1A3_HUMAN	DFIKNMITGTSQADCAVLIVAAGVGEFEAGISK	0.95
LAT3-S267+UV	S267+UV3 (F003706)	Elongation factor 1-alpha 1 OS=Homo sapiens OX=9606 GN=EEF1A1 PE=1 SV=1	EF1A1_HUMAN,EF1A3_HUMAN	DFIKNMITGTSQADCAVLIVAAGVGEFEAGISK	0.95
LAT3-S267+UV	S267+UV4 (F003707)	Elongation factor 1-alpha 1 OS=Homo sapiens OX=9606 GN=EEF1A1 PE=1 SV=1	EF1A1_HUMAN,EF1A3_HUMAN	DFIKNMITGTSQADCAVLIVAAGVGEFEAGISK	0.95
LAT3-S267+UV	S267+UV4 (F003707)	Elongation factor 1-alpha 1 OS=Homo sapiens OX=9606 GN=EEF1A1 PE=1 SV=1	EF1A1_HUMAN,EF1A3_HUMAN	NMITGTSQADCAVLIVAAGVGEFEAGISK	0.95
LAT3-S267+UV	S267+UV5 (F003708)	Elongation factor 1-alpha 1 OS=Homo sapiens OX=9606 GN=EEF1A1 PE=1 SV=1	EF1A1_HUMAN,EF1A3_HUMAN	DFIKNMITGTSQADCAVLIVAAGVGEFEAGISK	0.95
LAT3-S267-UV	S267-UV1 (F003709_1)	Elongation factor 1-alpha 1 OS=Homo sapiens OX=9606 GN=EEF1A1 PE=1 SV=1	EF1A1_HUMAN,EF1A3_HUMAN	DFIKNMITGTSQADCAVLIVAAGVGEFEAGISK	0.95
LAT3-S267-UV	S267-UV2 (F003710)	Elongation factor 1-alpha 1 OS=Homo sapiens OX=9606 GN=EEF1A1 PE=1 SV=1	EF1A1_HUMAN,EF1A3_HUMAN	DFIKNMITGTSQADCAVLIVAAGVGEFEAGISK	0.95
LAT3-S267-UV	S267-UV4 (F003712)	Elongation factor 1-alpha 1 OS=Homo sapiens OX=9606 GN=EEF1A1 PE=1 SV=1	EF1A1_HUMAN,EF1A3_HUMAN	DFIKNMITGTSQADCAVLIVAAGVGEFEAGISK	0.95
LAT3-S267-UV	S267-UV5 (F003713)	Elongation factor 1-alpha 1 OS=Homo sapiens OX=9606 GN=EEF1A1 PE=1 SV=1	EF1A1_HUMAN,EF1A3_HUMAN	DFIKNMITGTSQADCAVLIVAAGVGEFEAGISK	0.95
LAT3-S267-UV	S267-UV5 (F003713)	Elongation factor 1-alpha 1 OS=Homo sapiens OX=9606 GN=EEF1A1 PE=1 SV=1	EF1A1_HUMAN,EF1A3_HUMAN	IGYNPDTVAFVPISGWNGDNMLEPSANMPWFK	0.946
LAT3-S267-UV	S267-UV5 (F003713)	Elongation factor 1-alpha 1 OS=Homo sapiens OX=9606 GN=EEF1A1 PE=1 SV=1	EF1A1_HUMAN,EF1A3_HUMAN	NMITGTSQADCAVLIVAAGVGEFEAGISK	0.95
LAT3-S267+UV	S267+UV3 (F003706)	Eukaryotic translation initiation factor 3 subunit B OS=Homo sapiens OX=9606 GN=EIF3B PE=1 SV=3	EIF3B_HUMAN	GGVDTDELDSNVDDWEEETIEFFVTEEIIPLGNQE	0.95
LAT3-S267+UV	S267+UV3 (F003706)	Eukaryotic translation initiation factor 3 subunit B OS=Homo sapiens OX=9606 GN=EIF3B PE=1 SV=3	EIF3B_HUMAN	YLVTFSPLMDTQDDPQAIIIWDILTGHK	0.95
LAT3-S267+UV	S267+UV4 (F003707)	Eukaryotic translation initiation factor 3 subunit B OS=Homo sapiens OX=9606 GN=EIF3B PE=1 SV=3	EIF3B_HUMAN	YLVTFSPLMDTQDDPQAIIIWDILTGHK	0.95
LAT3-S267-UV	S267-UV1 (F003709_1)	Eukaryotic translation initiation factor 3 subunit B OS=Homo sapiens OX=9606 GN=EIF3B PE=1 SV=3	EIF3B_HUMAN	GGVDTDELDSNVDDWEEETIEFFVTEEIIPLGNQE	0.95
LAT3-S267-UV	S267-UV2 (F003710)	Eukaryotic translation initiation factor 3 subunit B OS=Homo sapiens OX=9606 GN=EIF3B PE=1 SV=3	EIF3B_HUMAN	GGVDTDELDSNVDDWEEETIEFFVTEEIIPLGNQE	0.95
LAT3-S267-UV	S267-UV3 (F003711)	Eukaryotic translation initiation factor 3 subunit B OS=Homo sapiens OX=9606 GN=EIF3B PE=1 SV=3	EIF3B_HUMAN	GGVDTDELDSNVDDWEEETIEFFVTEEIIPLGNQE	0.95
LAT3-S267-UV	S267-UV3 (F003711)	Eukaryotic translation initiation factor 3 subunit B OS=Homo sapiens OX=9606 GN=EIF3B PE=1 SV=3	EIF3B_HUMAN	YLVTFSPLMDTQDDPQAIIIWDILTGHK	0.95
LAT3-S267-UV	S267-UV4 (F003712)	Eukaryotic translation initiation factor 3 subunit B OS=Homo sapiens OX=9606 GN=EIF3B PE=1 SV=3	EIF3B_HUMAN	GGVDTDELDSNVDDWEEETIEFFVTEEIIPLGNQE	0.95
LAT3-S267-UV	S267-UV4 (F003712)	Eukaryotic translation initiation factor 3 subunit B OS=Homo sapiens OX=9606 GN=EIF3B PE=1 SV=3	EIF3B_HUMAN	YLVTFSPLMDTQDDPQAIIIWDILTGHK	0.95
LAT3-S267-UV	S267-UV5 (F003713)	Eukaryotic translation initiation factor 3 subunit B OS=Homo sapiens OX=9606 GN=EIF3B PE=1 SV=3	EIF3B_HUMAN	GGVDTDELDSNVDDWEEETIEFFVTEEIIPLGNQE	0.95
LAT3-S267-UV	S267-UV5 (F003713)	Eukaryotic translation initiation factor 3 subunit B OS=Homo sapiens OX=9606 GN=EIF3B PE=1 SV=3	EIF3B_HUMAN	YLVTFSPLMDTQDDPQAIIIWDILTGHK	0.95
LAT3-S267+UV	S267+UV2 (F003705)	Eukaryotic translation initiation factor 3 subunit F OS=Homo sapiens OX=9606 GN=EIF3F PE=1 SV=1	EIF3F_HUMAN	IQDALSTVLQYAEDVLSGK	0.95
LAT3-S267+UV	S267+UV3 (F003706)	Eukaryotic translation initiation factor 3 subunit F OS=Homo sapiens OX=9606 GN=EIF3F PE=1 SV=1	EIF3F_HUMAN	IQDALSTVLQYAEDVLSGK	0.95
LAT3-S267+UV	S267+UV3 (F003706)	Eukaryotic translation initiation factor 3 subunit F OS=Homo sapiens OX=9606 GN=EIF3F PE=1 SV=1	EIF3F_HUMAN	IQDALSTVLQYAEDVLSGKVSADNTVGR	0.95
LAT3-S267+UV	S267+UV4 (F003707)	Eukaryotic translation initiation factor 3 subunit F OS=Homo sapiens OX=9606 GN=EIF3F PE=1 SV=1	EIF3F_HUMAN	IQDALSTVLQYAEDVLSGK	0.95
LAT3-S267+UV	S267+UV4 (F003707)	Eukaryotic translation initiation factor 3 subunit F OS=Homo sapiens OX=9606 GN=EIF3F PE=1 SV=1	EIF3F_HUMAN	IQDALSTVLQYAEDVLSGKVSADNTVGR	0.95
LAT3-S267+UV	S267+UV5 (F003708)	Eukaryotic translation initiation factor 3 subunit F OS=Homo sapiens OX=9606 GN=EIF3F PE=1 SV=1	EIF3F_HUMAN	IQDALSTVLQYAEDVLSGKVSADNTVGR	0.95
LAT3-S267-UV	S267-UV2 (F003710)	Eukaryotic translation initiation factor 3 subunit F OS=Homo sapiens OX=9606 GN=EIF3F PE=1 SV=1	EIF3F_HUMAN	IQDALSTVLQYAEDVLSGK	0.95
LAT3-S267-UV	S267-UV2 (F003710)	Eukaryotic translation initiation factor 3 subunit F OS=Homo sapiens OX=9606 GN=EIF3F PE=1 SV=1	EIF3F_HUMAN	IQDALSTVLQYAEDVLSGKVSADNTVGR	0.95
LAT3-S267-UV	S267-UV3 (F003711)	Eukaryotic translation initiation factor 3 subunit F OS=Homo sapiens OX=9606 GN=EIF3F PE=1 SV=1	EIF3F_HUMAN	IQDALSTVLQYAEDVLSGK	0.95
LAT3-S267-UV	S267-UV4 (F003712)	Eukaryotic translation initiation factor 3 subunit F OS=Homo sapiens OX=9606 GN=EIF3F PE=1 SV=1	EIF3F_HUMAN	IQDALSTVLQYAEDVLSGK	0.95
LAT3-S267-UV	S267-UV5 (F003713)	Eukaryotic translation initiation factor 3 subunit F OS=Homo sapiens OX=9606 GN=EIF3F PE=1 SV=1	EIF3F_HUMAN	IQDALSTVLQYAEDVLSGK	0.95
LAT3-S267+UV	S267+UV1 (F003704)	RNA-binding protein FUS OS=Homo sapiens OX=9606 GN=FUS PE=1 SV=1	FUS_HUMAN	DQGSRHDSEQDNSDNNTIFVQGLGENVTIESVADYFK	0.95
LAT3-S267+UV	S267+UV1 (F003704)	RNA-binding protein FUS OS=Homo sapiens OX=9606 GN=FUS PE=1 SV=1	FUS_HUMAN	DQGSRHDSEQDNSDNNTIFVQGLGENVTIESVADYFKQIGIIK	0.95
LAT3-S267+UV	S267+UV1 (F003704)	RNA-binding protein FUS OS=Homo sapiens OX=9606 GN=FUS PE=1 SV=1	FUS_HUMAN	HDSEQDNSDNNTIFVQGLGENVTIESVADYFKQIGIIK	0.95
LAT3-S267+UV	S267+UV1 (F003704)	RNA-binding protein FUS OS=Homo sapiens OX=9606 GN=FUS PE=1 SV=1	FUS_HUMAN	LKGEATVSFDDPPSAK	0.95
LAT3-S267+UV	S267+UV2 (F003705)	RNA-binding protein FUS OS=Homo sapiens OX=9606 GN=FUS PE=1 SV=1	FUS_HUMAN	DQGSRHDSEQDNSDNNTIFVQGLGENVTIESVADYFK	0.95
LAT3-S267+UV	S267+UV2 (F003705)	RNA-binding protein FUS OS=Homo sapiens OX=9606 GN=FUS PE=1 SV=1	FUS_HUMAN	FGGPRDQGSRHDSEQDNSDNNTIFVQGLGENVTIESVADYFK	0.95
LAT3-S267+UV	S267+UV2 (F003705)	RNA-binding protein FUS OS=Homo sapiens OX=9606 GN=FUS PE=1 SV=1	FUS_HUMAN	HDSEQDNSDNNTIFVQGLGENVTIESVADYFKQIGIIK	0.95
LAT3-S267+UV	S267+UV2 (F003705)	RNA-binding protein FUS OS=Homo sapiens OX=9606 GN=FUS PE=1 SV=1	FUS_HUMAN	LKGEATVSFDDPPSAK	0.95
LAT3-S267+UV	S267+UV3 (F003706)	RNA-binding protein FUS OS=Homo sapiens OX=9606 GN=FUS PE=1 SV=1	FUS_HUMAN	DQGSRHDSEQDNSDNNTIFVQGLGENVTIESVADYFK	0.95
LAT3-S267+UV	S267+UV3 (F003706)	RNA-binding protein FUS OS=Homo sapiens OX=9606 GN=FUS PE=1 SV=1	FUS_HUMAN	FGGPRDQGSRHDSEQDNSDNNTIFVQGLGENVTIESVADYFK	0.95
LAT3-S267+UV	S267+UV3 (F003706)	RNA-binding protein FUS OS=Homo sapiens OX=9606 GN=FUS PE=1 SV=1	FUS_HUMAN	HDSEQDNSDNNTIFVQGLGENVTIESVADYFKQIGIIK	0.95
LAT3-S267+UV	S267+UV3 (F003706)	RNA-binding protein FUS OS=Homo sapiens OX=9606 GN=FUS PE=1 SV=1	FUS_HUMAN	LKGEATVSFDDPPSAK	0.95
LAT3-S267+UV	S267+UV4 (F003707)	RNA-binding protein FUS OS=Homo sapiens OX=9606 GN=FUS PE=1 SV=1	FUS_HUMAN	DQGSRHDSEQDNSDNNTIFVQGLGENVTIESVADYFK	0.95
LAT3-S267+UV	S267+UV4 (F003707)	RNA-binding protein FUS OS=Homo sapiens OX=9606 GN=FUS PE=1 SV=1	FUS_HUMAN	DQGSRHDSEQDNSDNNTIFVQGLGENVTIESVADYFKQIGIIK	0.95
LAT3-S267+UV	S267+UV4 (F003707)	RNA-binding protein FUS OS=Homo sapiens OX=9606 GN=FUS PE=1 SV=1	FUS_HUMAN	HDSEQDNSDNNTIFVQGLGENVTIESVADYFK	0.95
LAT3-S267+UV	S267+UV4 (F003707)	RNA-binding protein FUS OS=Homo sapiens OX=9606 GN=FUS PE=1 SV=1	FUS_HUMAN	HDSEQDNSDNNTIFVQGLGENVTIESVADYFKQIGIIK	0.95
LAT3-S267+UV	S267+UV4 (F003707)	RNA-binding protein FUS OS=Homo sapiens OX=9606 GN=FUS PE=1 SV=1	FUS_HUMAN	LKGEATVSFDDPPSAK	0.95
LAT3-S267+UV	S267+UV5 (F003708)	RNA-binding protein FUS OS=Homo sapiens OX=9606 GN=FUS PE=1 SV=1	FUS_HUMAN	DQGSRHDSEQDNSDNNTIFVQGLGENVTIESVADYFK	0.95
LAT3-S267+UV	S267+UV5 (F003708)	RNA-binding protein FUS OS=Homo sapiens OX=9606 GN=FUS PE=1 SV=1	FUS_HUMAN	HDSEQDNSDNNTIFVQGLGENVTIESVADYFKQIGIIK	0.95
LAT3-S267+UV	S267+UV5 (F003708)	RNA-binding protein FUS OS=Homo sapiens OX=9606 GN=FUS PE=1 SV=1	FUS_HUMAN	LKGEATVSFDDPPSAK	0.95
LAT3-S267-UV	S267-UV1 (F003709_1)	RNA-binding protein FUS OS=Homo sapiens OX=9606 GN=FUS PE=1 SV=1	FUS_HUMAN	HDSEQDNSDNNTIFVQGLGENVTIESVADYFKQIGIIK	0.95
LAT3-S267-UV	S267-UV1 (F003709_1)	RNA-binding protein FUS OS=Homo sapiens OX=9606 GN=FUS PE=1 SV=1	FUS_HUMAN	LKGEATVSFDDPPSAK	0.95
LAT3-S267-UV	S267-UV2 (F003710)	RNA-binding protein FUS OS=Homo sapiens OX=9606 GN=FUS PE=1 SV=1	FUS_HUMAN	DQGSRHDSEQDNSDNNTIFVQGLGENVTIESVADYFK	0.95
LAT3-S267-UV	S267-UV2 (F003710)	RNA-binding protein FUS OS=Homo sapiens OX=9606 GN=FUS PE=1 SV=1	FUS_HUMAN	FGGPRDQGSRHDSEQDNSDNNTIFVQGLGENVTIESVADYFK	0.95
LAT3-S267-UV	S267-UV2 (F003710)	RNA-binding protein FUS OS=Homo sapiens OX=9606 GN=FUS PE=1 SV=1	FUS_HUMAN	HDSEQDNSDNNTIFVQGLGENVTIESVADYFKQIGIIK	0.95
LAT3-S267-UV	S267-UV2 (F003710)	RNA-binding protein FUS OS=Homo sapiens OX=9606 GN=FUS PE=1 SV=1	FUS_HUMAN	LKGEATVSFDDPPSAK	0.95
LAT3-S267-UV	S267-UV3 (F003711)	RNA-binding protein FUS OS=Homo sapiens OX=9606 GN=FUS PE=1 SV=1	FUS_HUMAN	DQGSRHDSEQDNSDNNTIFVQGLGENVTIESVADYFKQIGIIK	0.95
LAT3-S267-UV	S267-UV3 (F003711)	RNA-binding protein FUS OS=Homo sapiens OX=9606 GN=FUS PE=1 SV=1	FUS_HUMAN	HDSEQDNSDNNTIFVQGLGENVTIESVADYFKQIGIIK	0.95
LAT3-S267-UV	S267-UV3 (F003711)	RNA-binding protein FUS OS=Homo sapiens OX=9606 GN=FUS PE=1 SV=1	FUS_HUMAN	LKGEATVSFDDPPSAK	0.95
LAT3-S267-UV	S267-UV4 (F003712)	RNA-binding protein FUS OS=Homo sapiens OX=9606 GN=FUS PE=1 SV=1	FUS_HUMAN	DQGSRHDSEQDNSDNNTIFVQGLGENVTIESVADYFK	0.95
LAT3-S267-UV	S267-UV4 (F003712)	RNA-binding protein FUS OS=Homo sapiens OX=9606 GN=FUS PE=1 SV=1	FUS_HUMAN	HDSEQDNSDNNTIFVQGLGENVTIESVADYFKQIGIIK	0.95
LAT3-S267-UV	S267-UV4 (F003712)	RNA-binding protein FUS OS=Homo sapiens OX=9606 GN=FUS PE=1 SV=1	FUS_HUMAN	LKGEATVSFDDPPSAK	0.95
LAT3-S267-UV	S267-UV5 (F003713)	RNA-binding protein FUS OS=Homo sapiens OX=9606 GN=FUS PE=1 SV=1	FUS_HUMAN	HDSEQDNSDNNTIFVQGLGENVTIESVADYFKQIGIIK	0.95
LAT3-S267-UV	S267-UV5 (F003713)	RNA-binding protein FUS OS=Homo sapiens OX=9606 GN=FUS PE=1 SV=1	FUS_HUMAN	LKGEATVSFDDPPSAK	0.95
LAT3-S267+UV	S267+UV2 (F003705)	Histone H3.2 OS=Homo sapiens OX=9606 GN=HIST2H3A PE=1 SV=3	H32_HUMAN	FQSSAVMALQEASEAYLVGLFEDTNLCAIHAK	0.95
LAT3-S267+UV	S267+UV3 (F003706)	Histone H3.2 OS=Homo sapiens OX=9606 GN=HIST2H3A PE=1 SV=3	H32_HUMAN	FQSSAVMALQEASEAYLVGLFEDTNLCAIHAK	0.95
LAT3-S267+UV	S267+UV4 (F003707)	Histone H3.2 OS=Homo sapiens OX=9606 GN=HIST2H3A PE=1 SV=3	H32_HUMAN	FQSSAVMALQEASEAYLVGLFEDTNLCAIHAK	0.95
LAT3-S267+UV	S267+UV4 (F003707)	Histone H3.2 OS=Homo sapiens OX=9606 GN=HIST2H3A PE=1 SV=3	H32_HUMAN	FQSSAVMALQEASEAYLVGLFEDTNLCAIHAKR	0.95
LAT3-S267-UV	S267-UV1 (F003709_1)	Histone H3.2 OS=Homo sapiens OX=9606 GN=HIST2H3A PE=1 SV=3	H32_HUMAN	FQSSAVMALQEASEAYLVGLFEDTNLCAIHAK	0.95
LAT3-S267-UV	S267-UV2 (F003710)	Histone H3.2 OS=Homo sapiens OX=9606 GN=HIST2H3A PE=1 SV=3	H32_HUMAN	FQSSAVMALQEASEAYLVGLFEDTNLCAIHAK	0.95
LAT3-S267+UV	S267+UV1 (F003704)	Heterogeneous nuclear ribonucleoprotein H OS=Homo sapiens OX=9606 GN=HNRNPH1 PE=1 SV=4	HNRH1_HUMAN	EGRPSGEAFVELESEDEVK	0.95
LAT3-S267+UV	S267+UV1 (F003704)	Heterogeneous nuclear ribonucleoprotein H OS=Homo sapiens OX=9606 GN=HNRNPH1 PE=1 SV=4	HNRH1_HUMAN	EGRPSGEAFVELESEDEVKL	0.95
LAT3-S267+UV	S267+UV1 (F003704)	Heterogeneous nuclear ribonucleoprotein H OS=Homo sapiens OX=9606 GN=HNRNPH1 PE=1 SV=4	HNRH1_HUMAN	GLPFGCSKEEIVQFFSGLEIVPNGITLPVDFQGR	0.95
LAT3-S267+UV	S267+UV1 (F003704)	Heterogeneous nuclear ribonucleoprotein H OS=Homo sapiens OX=9606 GN=HNRNPH1 PE=1 SV=4	HNRH1_HUMAN	LRGLPFGCSKEEIVQFFSGLEIVPNGITLPVDFQGR	0.95
LAT3-S267+UV	S267+UV1 (F003704)	Heterogeneous nuclear ribonucleoprotein H OS=Homo sapiens OX=9606 GN=HNRNPH1 PE=1 SV=4	HNRH1_HUMAN	STGEAFVQFASQEIAEK	0.95
LAT3-S267+UV	S267+UV1 (F003704)	Heterogeneous nuclear ribonucleoprotein H OS=Homo sapiens OX=9606 GN=HNRNPH1 PE=1 SV=4	HNRH1_HUMAN	YVELFLNSTAGASGGAYEHR	0.95
LAT3-S267+UV	S267+UV1 (F003704)	Heterogeneous nuclear ribonucleoprotein H OS=Homo sapiens OX=9606 GN=HNRNPH1 PE=1 SV=4	HNRH1_HUMAN	YVEVFKSNNVEMDWVLK	0.95
LAT3-S267+UV	S267+UV2 (F003705)	Heterogeneous nuclear ribonucleoprotein H OS=Homo sapiens OX=9606 GN=HNRNPH1 PE=1 SV=4	HNRH1_HUMAN	EGRPSGEAFVELESEDEVK	0.95
LAT3-S267+UV	S267+UV2 (F003705)	Heterogeneous nuclear ribonucleoprotein H OS=Homo sapiens OX=9606 GN=HNRNPH1 PE=1 SV=4	HNRH1_HUMAN	GLPFGCSKEEIVQFFSGLEIVPNGITLPVDFQGR	0.95
LAT3-S267+UV	S267+UV2 (F003705)	Heterogeneous nuclear ribonucleoprotein H OS=Homo sapiens OX=9606 GN=HNRNPH1 PE=1 SV=4	HNRH1_HUMAN	LRGLPFGCSKEEIVQFFSGLEIVPNGITLPVDFQGR	0.95
LAT3-S267+UV	S267+UV2 (F003705)	Heterogeneous nuclear ribonucleoprotein H OS=Homo sapiens OX=9606 GN=HNRNPH1 PE=1 SV=4	HNRH1_HUMAN	STGEAFVQFASQEIAEK	0.95
LAT3-S267+UV	S267+UV2 (F003705)	Heterogeneous nuclear ribonucleoprotein H OS=Homo sapiens OX=9606 GN=HNRNPH1 PE=1 SV=4	HNRH1_HUMAN	VTGEADVEFATHEDAVAAMSK	0.95
LAT3-S267+UV	S267+UV2 (F003705)	Heterogeneous nuclear ribonucleoprotein H OS=Homo sapiens OX=9606 GN=HNRNPH1 PE=1 SV=4	HNRH1_HUMAN	YVELFLNSTAGASGGAYEHR	0.95
LAT3-S267+UV	S267+UV2 (F003705)	Heterogeneous nuclear ribonucleoprotein H OS=Homo sapiens OX=9606 GN=HNRNPH1 PE=1 SV=4	HNRH1_HUMAN	YVEVFKSNNVEMDWVLK	0.95
LAT3-S267+UV	S267+UV3 (F003706)	Heterogeneous nuclear ribonucleoprotein H OS=Homo sapiens OX=9606 GN=HNRNPH1 PE=1 SV=4	HNRH1_HUMAN	EGRPSGEAFVELESEDEVK	0.95
LAT3-S267+UV	S267+UV3 (F003706)	Heterogeneous nuclear ribonucleoprotein H OS=Homo sapiens OX=9606 GN=HNRNPH1 PE=1 SV=4	HNRH1_HUMAN	GLPFGCSKEEIVQFFSGLEIVPNGITLPVDFQGR	0.95
LAT3-S267+UV	S267+UV3 (F003706)	Heterogeneous nuclear ribonucleoprotein H OS=Homo sapiens OX=9606 GN=HNRNPH1 PE=1 SV=4	HNRH1_HUMAN	LRGLPFGCSKEEIVQFFSGLEIVPNGITLPVDFQGR	0.95
LAT3-S267+UV	S267+UV3 (F003706)	Heterogeneous nuclear ribonucleoprotein H OS=Homo sapiens OX=9606 GN=HNRNPH1 PE=1 SV=4	HNRH1_HUMAN	STGEAFVQFASQEIAEK	0.95
LAT3-S267+UV	S267+UV3 (F003706)	Heterogeneous nuclear ribonucleoprotein H OS=Homo sapiens OX=9606 GN=HNRNPH1 PE=1 SV=4	HNRH1_HUMAN	YVELFLNSTAGASGGAYEHR	0.95
LAT3-S267+UV	S267+UV3 (F003706)	Heterogeneous nuclear ribonucleoprotein H OS=Homo sapiens OX=9606 GN=HNRNPH1 PE=1 SV=4	HNRH1_HUMAN	YVEVFKSNNVEMDWVLK	0.95
LAT3-S267+UV	S267+UV4 (F003707)	Heterogeneous nuclear ribonucleoprotein H OS=Homo sapiens OX=9606 GN=HNRNPH1 PE=1 SV=4	HNRH1_HUMAN	EGRPSGEAFVELESEDEVK	0.95
LAT3-S267+UV	S267+UV4 (F003707)	Heterogeneous nuclear ribonucleoprotein H OS=Homo sapiens OX=9606 GN=HNRNPH1 PE=1 SV=4	HNRH1_HUMAN	EGRPSGEAFVELESEDEVKL	0.95
LAT3-S267+UV	S267+UV4 (F003707)	Heterogeneous nuclear ribonucleoprotein H OS=Homo sapiens OX=9606 GN=HNRNPH1 PE=1 SV=4	HNRH1_HUMAN	GLPFGCSKEEIVQFFSGLEIVPNGITLPVDFQGR	0.95
LAT3-S267+UV	S267+UV4 (F003707)	Heterogeneous nuclear ribonucleoprotein H OS=Homo sapiens OX=9606 GN=HNRNPH1 PE=1 SV=4	HNRH1_HUMAN	LRGLPFGCSKEEIVQFFSGLEIVPNGITLPVDFQGR	0.95
LAT3-S267+UV	S267+UV4 (F003707)	Heterogeneous nuclear ribonucleoprotein H OS=Homo sapiens OX=9606 GN=HNRNPH1 PE=1 SV=4	HNRH1_HUMAN	STGEAFVQFASQEIAEK	0.95
LAT3-S267+UV	S267+UV4 (F003707)	Heterogeneous nuclear ribonucleoprotein H OS=Homo sapiens OX=9606 GN=HNRNPH1 PE=1 SV=4	HNRH1_HUMAN	YVELFLNSTAGASGGAYEHR	0.95
LAT3-S267+UV	S267+UV4 (F003707)	Heterogeneous nuclear ribonucleoprotein H OS=Homo sapiens OX=9606 GN=HNRNPH1 PE=1 SV=4	HNRH1_HUMAN	YVEVFKSNNVEMDWVLK	0.95
LAT3-S267+UV	S267+UV5 (F003708)	Heterogeneous nuclear ribonucleoprotein H OS=Homo sapiens OX=9606 GN=HNRNPH1 PE=1 SV=4	HNRH1_HUMAN	EGRPSGEAFVELESEDEVK	0.95
LAT3-S267+UV	S267+UV5 (F003708)	Heterogeneous nuclear ribonucleoprotein H OS=Homo sapiens OX=9606 GN=HNRNPH1 PE=1 SV=4	HNRH1_HUMAN	EGRPSGEAFVELESEDEVKLALKK	0.95
LAT3-S267+UV	S267+UV5 (F003708)	Heterogeneous nuclear ribonucleoprotein H OS=Homo sapiens OX=9606 GN=HNRNPH1 PE=1 SV=4	HNRH1_HUMAN	GLPFGCSKEEIVQFFSGLEIVPNGITLPVDFQGR	0.95
LAT3-S267+UV	S267+UV5 (F003708)	Heterogeneous nuclear ribonucleoprotein H OS=Homo sapiens OX=9606 GN=HNRNPH1 PE=1 SV=4	HNRH1_HUMAN	LRGLPFGCSKEEIVQFFSGLEIVPNGITLPVDFQGR	0.95
LAT3-S267+UV	S267+UV5 (F003708)	Heterogeneous nuclear ribonucleoprotein H OS=Homo sapiens OX=9606 GN=HNRNPH1 PE=1 SV=4	HNRH1_HUMAN	STGEAFVQFASQEIAEK	0.95
LAT3-S267+UV	S267+UV5 (F003708)	Heterogeneous nuclear ribonucleoprotein H OS=Homo sapiens OX=9606 GN=HNRNPH1 PE=1 SV=4	HNRH1_HUMAN	VTGEADVEFATHEDAVAAMSK	0.95
LAT3-S267+UV	S267+UV5 (F003708)	Heterogeneous nuclear ribonucleoprotein H OS=Homo sapiens OX=9606 GN=HNRNPH1 PE=1 SV=4	HNRH1_HUMAN	YVELFLNSTAGASGGAYEHR	0.95
LAT3-S267-UV	S267-UV1 (F003709_1)	Heterogeneous nuclear ribonucleoprotein H OS=Homo sapiens OX=9606 GN=HNRNPH1 PE=1 SV=4	HNRH1_HUMAN	EGRPSGEAFVELESEDEVK	0.95
LAT3-S267-UV	S267-UV1 (F003709_1)	Heterogeneous nuclear ribonucleoprotein H OS=Homo sapiens OX=9606 GN=HNRNPH1 PE=1 SV=4	HNRH1_HUMAN	EGRPSGEAFVELESEDEVKL	0.95
LAT3-S267-UV	S267-UV1 (F003709_1)	Heterogeneous nuclear ribonucleoprotein H OS=Homo sapiens OX=9606 GN=HNRNPH1 PE=1 SV=4	HNRH1_HUMAN	STGEAFVQFASQEIAEK	0.95
LAT3-S267-UV	S267-UV1 (F003709_1)	Heterogeneous nuclear ribonucleoprotein H OS=Homo sapiens OX=9606 GN=HNRNPH1 PE=1 SV=4	HNRH1_HUMAN	YVELFLNSTAGASGGAYEHR	0.95
LAT3-S267-UV	S267-UV2 (F003710)	Heterogeneous nuclear ribonucleoprotein H OS=Homo sapiens OX=9606 GN=HNRNPH1 PE=1 SV=4	HNRH1_HUMAN	EGRPSGEAFVELESEDEVK	0.95
LAT3-S267-UV	S267-UV2 (F003710)	Heterogeneous nuclear ribonucleoprotein H OS=Homo sapiens OX=9606 GN=HNRNPH1 PE=1 SV=4	HNRH1_HUMAN	EGRPSGEAFVELESEDEVKL	0.95
LAT3-S267-UV	S267-UV2 (F003710)	Heterogeneous nuclear ribonucleoprotein H OS=Homo sapiens OX=9606 GN=HNRNPH1 PE=1 SV=4	HNRH1_HUMAN	GLPFGCSKEEIVQFFSGLEIVPNGITLPVDFQGR	0.95
LAT3-S267-UV	S267-UV2 (F003710)	Heterogeneous nuclear ribonucleoprotein H OS=Homo sapiens OX=9606 GN=HNRNPH1 PE=1 SV=4	HNRH1_HUMAN	LRGLPFGCSKEEIVQFFSGLEIVPNGITLPVDFQGR	0.95
LAT3-S267-UV	S267-UV2 (F003710)	Heterogeneous nuclear ribonucleoprotein H OS=Homo sapiens OX=9606 GN=HNRNPH1 PE=1 SV=4	HNRH1_HUMAN	STGEAFVQFASQEIAEK	0.95
LAT3-S267-UV	S267-UV2 (F003710)	Heterogeneous nuclear ribonucleoprotein H OS=Homo sapiens OX=9606 GN=HNRNPH1 PE=1 SV=4	HNRH1_HUMAN	YVELFLNSTAGASGGAYEHR	0.95
LAT3-S267-UV	S267-UV3 (F003711)	Heterogeneous nuclear ribonucleoprotein H OS=Homo sapiens OX=9606 GN=HNRNPH1 PE=1 SV=4	HNRH1_HUMAN	EGRPSGEAFVELESEDEVK	0.95
LAT3-S267-UV	S267-UV3 (F003711)	Heterogeneous nuclear ribonucleoprotein H OS=Homo sapiens OX=9606 GN=HNRNPH1 PE=1 SV=4	HNRH1_HUMAN	GLPFGCSKEEIVQFFSGLEIVPNGITLPVDFQGR	0.95
LAT3-S267-UV	S267-UV3 (F003711)	Heterogeneous nuclear ribonucleoprotein H OS=Homo sapiens OX=9606 GN=HNRNPH1 PE=1 SV=4	HNRH1_HUMAN	LRGLPFGCSKEEIVQFFSGLEIVPNGITLPVDFQGR	0.95
LAT3-S267-UV	S267-UV3 (F003711)	Heterogeneous nuclear ribonucleoprotein H OS=Homo sapiens OX=9606 GN=HNRNPH1 PE=1 SV=4	HNRH1_HUMAN	STGEAFVQFASQEIAEK	0.95
LAT3-S267-UV	S267-UV3 (F003711)	Heterogeneous nuclear ribonucleoprotein H OS=Homo sapiens OX=9606 GN=HNRNPH1 PE=1 SV=4	HNRH1_HUMAN	YVELFLNSTAGASGGAYEHR	0.95
LAT3-S267-UV	S267-UV3 (F003711)	Heterogeneous nuclear ribonucleoprotein H OS=Homo sapiens OX=9606 GN=HNRNPH1 PE=1 SV=4	HNRH1_HUMAN	YVEVFKSNNVEMDWVLK	0.95
LAT3-S267-UV	S267-UV4 (F003712)	Heterogeneous nuclear ribonucleoprotein H OS=Homo sapiens OX=9606 GN=HNRNPH1 PE=1 SV=4	HNRH1_HUMAN	EGRPSGEAFVELESEDEVK	0.95
LAT3-S267-UV	S267-UV4 (F003712)	Heterogeneous nuclear ribonucleoprotein H OS=Homo sapiens OX=9606 GN=HNRNPH1 PE=1 SV=4	HNRH1_HUMAN	EGRPSGEAFVELESEDEVKL	0.95
LAT3-S267-UV	S267-UV4 (F003712)	Heterogeneous nuclear ribonucleoprotein H OS=Homo sapiens OX=9606 GN=HNRNPH1 PE=1 SV=4	HNRH1_HUMAN	GLPFGCSKEEIVQFFSGLEIVPNGITLPVDFQGR	0.95
LAT3-S267-UV	S267-UV4 (F003712)	Heterogeneous nuclear ribonucleoprotein H OS=Homo sapiens OX=9606 GN=HNRNPH1 PE=1 SV=4	HNRH1_HUMAN	LRGLPFGCSKEEIVQFFSGLEIVPNGITLPVDFQGR	0.95
LAT3-S267-UV	S267-UV4 (F003712)	Heterogeneous nuclear ribonucleoprotein H OS=Homo sapiens OX=9606 GN=HNRNPH1 PE=1 SV=4	HNRH1_HUMAN	STGEAFVQFASQEIAEK	0.95
LAT3-S267-UV	S267-UV4 (F003712)	Heterogeneous nuclear ribonucleoprotein H OS=Homo sapiens OX=9606 GN=HNRNPH1 PE=1 SV=4	HNRH1_HUMAN	YVELFLNSTAGASGGAYEHR	0.95
LAT3-S267-UV	S267-UV5 (F003713)	Heterogeneous nuclear ribonucleoprotein H OS=Homo sapiens OX=9606 GN=HNRNPH1 PE=1 SV=4	HNRH1_HUMAN	EGRPSGEAFVELESEDEVK	0.95
LAT3-S267-UV	S267-UV5 (F003713)	Heterogeneous nuclear ribonucleoprotein H OS=Homo sapiens OX=9606 GN=HNRNPH1 PE=1 SV=4	HNRH1_HUMAN	EGRPSGEAFVELESEDEVKL	0.95
LAT3-S267-UV	S267-UV5 (F003713)	Heterogeneous nuclear ribonucleoprotein H OS=Homo sapiens OX=9606 GN=HNRNPH1 PE=1 SV=4	HNRH1_HUMAN	GLPFGCSKEEIVQFFSGLEIVPNGITLPVDFQGR	0.95
LAT3-S267-UV	S267-UV5 (F003713)	Heterogeneous nuclear ribonucleoprotein H OS=Homo sapiens OX=9606 GN=HNRNPH1 PE=1 SV=4	HNRH1_HUMAN	LRGLPFGCSKEEIVQFFSGLEIVPNGITLPVDFQGR	0.95
LAT3-S267-UV	S267-UV5 (F003713)	Heterogeneous nuclear ribonucleoprotein H OS=Homo sapiens OX=9606 GN=HNRNPH1 PE=1 SV=4	HNRH1_HUMAN	STGEAFVQFASQEIAEK	0.95
LAT3-S267-UV	S267-UV5 (F003713)	Heterogeneous nuclear ribonucleoprotein H OS=Homo sapiens OX=9606 GN=HNRNPH1 PE=1 SV=4	HNRH1_HUMAN	YVELFLNSTAGASGGAYEHR	0.95
LAT3-S267-UV	S267-UV5 (F003713)	Heterogeneous nuclear ribonucleoprotein H OS=Homo sapiens OX=9606 GN=HNRNPH1 PE=1 SV=4	HNRH1_HUMAN	YVEVFKSNNVEMDWVLK	0.95
LAT3-S267+UV	S267+UV1 (F003704)	Heterogeneous nuclear ribonucleoprotein H2 OS=Homo sapiens OX=9606 GN=HNRNPH2 PE=1 SV=1	HNRH2_HUMAN	EGRPSGEAFVELESEEEVK	0.95
LAT3-S267+UV	S267+UV1 (F003704)	Heterogeneous nuclear ribonucleoprotein H2 OS=Homo sapiens OX=9606 GN=HNRNPH2 PE=1 SV=1	HNRH2_HUMAN	STGEAFVQFASQEIAEK	0.95
LAT3-S267+UV	S267+UV1 (F003704)	Heterogeneous nuclear ribonucleoprotein H2 OS=Homo sapiens OX=9606 GN=HNRNPH2 PE=1 SV=1	HNRH2_HUMAN	YVEVFKSNSVEMDWVLK	0.95
LAT3-S267+UV	S267+UV2 (F003705)	Heterogeneous nuclear ribonucleoprotein H2 OS=Homo sapiens OX=9606 GN=HNRNPH2 PE=1 SV=1	HNRH2_HUMAN	EGRPSGEAFVELESEEEVK	0.95
LAT3-S267+UV	S267+UV2 (F003705)	Heterogeneous nuclear ribonucleoprotein H2 OS=Homo sapiens OX=9606 GN=HNRNPH2 PE=1 SV=1	HNRH2_HUMAN	GLPFGCSKEEIVQFFSGLEIVPNGMTLPVDFQGR	0.95
LAT3-S267+UV	S267+UV2 (F003705)	Heterogeneous nuclear ribonucleoprotein H2 OS=Homo sapiens OX=9606 GN=HNRNPH2 PE=1 SV=1	HNRH2_HUMAN	LRGLPFGCSKEEIVQFFSGLEIVPNGMTLPVDFQGR	0.95
LAT3-S267+UV	S267+UV2 (F003705)	Heterogeneous nuclear ribonucleoprotein H2 OS=Homo sapiens OX=9606 GN=HNRNPH2 PE=1 SV=1	HNRH2_HUMAN	STGEAFVQFASQEIAEK	0.95
LAT3-S267+UV	S267+UV2 (F003705)	Heterogeneous nuclear ribonucleoprotein H2 OS=Homo sapiens OX=9606 GN=HNRNPH2 PE=1 SV=1	HNRH2_HUMAN	VTGEADVEFATHEDAVAAMAK	0.95
LAT3-S267+UV	S267+UV3 (F003706)	Heterogeneous nuclear ribonucleoprotein H2 OS=Homo sapiens OX=9606 GN=HNRNPH2 PE=1 SV=1	HNRH2_HUMAN	EGRPSGEAFVELESEEEVK	0.95
LAT3-S267+UV	S267+UV3 (F003706)	Heterogeneous nuclear ribonucleoprotein H2 OS=Homo sapiens OX=9606 GN=HNRNPH2 PE=1 SV=1	HNRH2_HUMAN	LRGLPFGCSKEEIVQFFSGLEIVPNGMTLPVDFQGR	0.95
LAT3-S267+UV	S267+UV3 (F003706)	Heterogeneous nuclear ribonucleoprotein H2 OS=Homo sapiens OX=9606 GN=HNRNPH2 PE=1 SV=1	HNRH2_HUMAN	STGEAFVQFASQEIAEK	0.95
LAT3-S267+UV	S267+UV4 (F003707)	Heterogeneous nuclear ribonucleoprotein H2 OS=Homo sapiens OX=9606 GN=HNRNPH2 PE=1 SV=1	HNRH2_HUMAN	EGRPSGEAFVELESEEEVK	0.95
LAT3-S267+UV	S267+UV4 (F003707)	Heterogeneous nuclear ribonucleoprotein H2 OS=Homo sapiens OX=9606 GN=HNRNPH2 PE=1 SV=1	HNRH2_HUMAN	STGEAFVQFASQEIAEK	0.95
LAT3-S267+UV	S267+UV4 (F003707)	Heterogeneous nuclear ribonucleoprotein H2 OS=Homo sapiens OX=9606 GN=HNRNPH2 PE=1 SV=1	HNRH2_HUMAN	VTGEADVEFATHEDAVAAMAK	0.95
LAT3-S267+UV	S267+UV5 (F003708)	Heterogeneous nuclear ribonucleoprotein H2 OS=Homo sapiens OX=9606 GN=HNRNPH2 PE=1 SV=1	HNRH2_HUMAN	EGRPSGEAFVELESEEEVK	0.95
LAT3-S267+UV	S267+UV5 (F003708)	Heterogeneous nuclear ribonucleoprotein H2 OS=Homo sapiens OX=9606 GN=HNRNPH2 PE=1 SV=1	HNRH2_HUMAN	LRGLPFGCSKEEIVQFFSGLEIVPNGMTLPVDFQGR	0.946
LAT3-S267+UV	S267+UV5 (F003708)	Heterogeneous nuclear ribonucleoprotein H2 OS=Homo sapiens OX=9606 GN=HNRNPH2 PE=1 SV=1	HNRH2_HUMAN	STGEAFVQFASQEIAEK	0.95
LAT3-S267+UV	S267+UV5 (F003708)	Heterogeneous nuclear ribonucleoprotein H2 OS=Homo sapiens OX=9606 GN=HNRNPH2 PE=1 SV=1	HNRH2_HUMAN	VTGEADVEFATHEDAVAAMAK	0.95
LAT3-S267-UV	S267-UV1 (F003709_1)	Heterogeneous nuclear ribonucleoprotein H2 OS=Homo sapiens OX=9606 GN=HNRNPH2 PE=1 SV=1	HNRH2_HUMAN	EGRPSGEAFVELESEEEVK	0.946
LAT3-S267-UV	S267-UV1 (F003709_1)	Heterogeneous nuclear ribonucleoprotein H2 OS=Homo sapiens OX=9606 GN=HNRNPH2 PE=1 SV=1	HNRH2_HUMAN	STGEAFVQFASQEIAEK	0.95
LAT3-S267-UV	S267-UV2 (F003710)	Heterogeneous nuclear ribonucleoprotein H2 OS=Homo sapiens OX=9606 GN=HNRNPH2 PE=1 SV=1	HNRH2_HUMAN	EGRPSGEAFVELESEEEVK	0.95
LAT3-S267-UV	S267-UV2 (F003710)	Heterogeneous nuclear ribonucleoprotein H2 OS=Homo sapiens OX=9606 GN=HNRNPH2 PE=1 SV=1	HNRH2_HUMAN	STGEAFVQFASQEIAEK	0.95
LAT3-S267-UV	S267-UV4 (F003712)	Heterogeneous nuclear ribonucleoprotein H2 OS=Homo sapiens OX=9606 GN=HNRNPH2 PE=1 SV=1	HNRH2_HUMAN	EGRPSGEAFVELESEEEVK	0.95
LAT3-S267-UV	S267-UV4 (F003712)	Heterogeneous nuclear ribonucleoprotein H2 OS=Homo sapiens OX=9606 GN=HNRNPH2 PE=1 SV=1	HNRH2_HUMAN	LRGLPFGCSKEEIVQFFSGLEIVPNGMTLPVDFQGR	0.95
LAT3-S267-UV	S267-UV4 (F003712)	Heterogeneous nuclear ribonucleoprotein H2 OS=Homo sapiens OX=9606 GN=HNRNPH2 PE=1 SV=1	HNRH2_HUMAN	STGEAFVQFASQEIAEK	0.95
LAT3-S267-UV	S267-UV5 (F003713)	Heterogeneous nuclear ribonucleoprotein H2 OS=Homo sapiens OX=9606 GN=HNRNPH2 PE=1 SV=1	HNRH2_HUMAN	EGRPSGEAFVELESEEEVK	0.95
LAT3-S267-UV	S267-UV5 (F003713)	Heterogeneous nuclear ribonucleoprotein H2 OS=Homo sapiens OX=9606 GN=HNRNPH2 PE=1 SV=1	HNRH2_HUMAN	STGEAFVQFASQEIAEK	0.95
LAT3-S267+UV	S267+UV1 (F003704)	Heterogeneous nuclear ribonucleoprotein H3 OS=Homo sapiens OX=9606 GN=HNRNPH3 PE=1 SV=2	HNRH3_HUMAN	ATGEADVEFVTHEDAVAAMSK	0.95
LAT3-S267+UV	S267+UV2 (F003705)	Heterogeneous nuclear ribonucleoprotein H3 OS=Homo sapiens OX=9606 GN=HNRNPH3 PE=1 SV=2	HNRH3_HUMAN	ATGEADVEFVTHEDAVAAMSK	0.95
LAT3-S267+UV	S267+UV2 (F003705)	Heterogeneous nuclear ribonucleoprotein H3 OS=Homo sapiens OX=9606 GN=HNRNPH3 PE=1 SV=2	HNRH3_HUMAN	STGEAFVQFASK	0.95
LAT3-S267+UV	S267+UV3 (F003706)	Heterogeneous nuclear ribonucleoprotein H3 OS=Homo sapiens OX=9606 GN=HNRNPH3 PE=1 SV=2	HNRH3_HUMAN	ATGEADVEFVTHEDAVAAMSK	0.95
LAT3-S267+UV	S267+UV3 (F003706)	Heterogeneous nuclear ribonucleoprotein H3 OS=Homo sapiens OX=9606 GN=HNRNPH3 PE=1 SV=2	HNRH3_HUMAN	LRGLPFGCSKEEIVQFFQGLEIVPNGITLTMDYQGR	0.95
LAT3-S267+UV	S267+UV3 (F003706)	Heterogeneous nuclear ribonucleoprotein H3 OS=Homo sapiens OX=9606 GN=HNRNPH3 PE=1 SV=2	HNRH3_HUMAN	STGEAFVQFASK	0.95
LAT3-S267+UV	S267+UV4 (F003707)	Heterogeneous nuclear ribonucleoprotein H3 OS=Homo sapiens OX=9606 GN=HNRNPH3 PE=1 SV=2	HNRH3_HUMAN	ATGEADVEFVTHEDAVAAMSK	0.95
LAT3-S267+UV	S267+UV4 (F003707)	Heterogeneous nuclear ribonucleoprotein H3 OS=Homo sapiens OX=9606 GN=HNRNPH3 PE=1 SV=2	HNRH3_HUMAN	STGEAFVQFASK	0.95
LAT3-S267+UV	S267+UV5 (F003708)	Heterogeneous nuclear ribonucleoprotein H3 OS=Homo sapiens OX=9606 GN=HNRNPH3 PE=1 SV=2	HNRH3_HUMAN	ATGEADVEFVTHEDAVAAMSK	0.95
LAT3-S267+UV	S267+UV5 (F003708)	Heterogeneous nuclear ribonucleoprotein H3 OS=Homo sapiens OX=9606 GN=HNRNPH3 PE=1 SV=2	HNRH3_HUMAN	STGEAFVQFASK	0.95
LAT3-S267-UV	S267-UV2 (F003710)	Heterogeneous nuclear ribonucleoprotein H3 OS=Homo sapiens OX=9606 GN=HNRNPH3 PE=1 SV=2	HNRH3_HUMAN	ATGEADVEFVTHEDAVAAMSK	0.95
LAT3-S267-UV	S267-UV2 (F003710)	Heterogeneous nuclear ribonucleoprotein H3 OS=Homo sapiens OX=9606 GN=HNRNPH3 PE=1 SV=2	HNRH3_HUMAN	STGEAFVQFASK	0.95
LAT3-S267-UV	S267-UV3 (F003711)	Heterogeneous nuclear ribonucleoprotein H3 OS=Homo sapiens OX=9606 GN=HNRNPH3 PE=1 SV=2	HNRH3_HUMAN	ATGEADVEFVTHEDAVAAMSK	0.95
LAT3-S267-UV	S267-UV3 (F003711)	Heterogeneous nuclear ribonucleoprotein H3 OS=Homo sapiens OX=9606 GN=HNRNPH3 PE=1 SV=2	HNRH3_HUMAN	STGEAFVQFASK	0.95
LAT3-S267-UV	S267-UV5 (F003713)	Heterogeneous nuclear ribonucleoprotein H3 OS=Homo sapiens OX=9606 GN=HNRNPH3 PE=1 SV=2	HNRH3_HUMAN	STGEAFVQFASK	0.95
LAT3-S267+UV	S267+UV1 (F003704)	Heterogeneous nuclear ribonucleoprotein U-like protein 1 OS=Homo sapiens OX=9606 GN=HNRNPUL1 PE=1 SV=2	HNRL1_HUMAN	ANFTLPDVGDFLDEVLFIELQREEADKLVR	0.95
LAT3-S267+UV	S267+UV1 (F003704)	Heterogeneous nuclear ribonucleoprotein U-like protein 1 OS=Homo sapiens OX=9606 GN=HNRNPUL1 PE=1 SV=2	HNRL1_HUMAN	NYAGRWDVLIQQATQCLNRLIQIAAR	0.95
LAT3-S267+UV	S267+UV2 (F003705)	Heterogeneous nuclear ribonucleoprotein U-like protein 1 OS=Homo sapiens OX=9606 GN=HNRNPUL1 PE=1 SV=2	HNRL1_HUMAN	ANFTLPDVGDFLDEVLFIELQREEADKLVR	0.95
LAT3-S267+UV	S267+UV3 (F003706)	Heterogeneous nuclear ribonucleoprotein U-like protein 1 OS=Homo sapiens OX=9606 GN=HNRNPUL1 PE=1 SV=2	HNRL1_HUMAN	ANFTLPDVGDFLDEVLFIELQREEADKLVR	0.95
LAT3-S267+UV	S267+UV3 (F003706)	Heterogeneous nuclear ribonucleoprotein U-like protein 1 OS=Homo sapiens OX=9606 GN=HNRNPUL1 PE=1 SV=2	HNRL1_HUMAN	NYAGRWDVLIQQATQCLNRLIQIAAR	0.95
LAT3-S267+UV	S267+UV3 (F003706)	Heterogeneous nuclear ribonucleoprotein U-like protein 1 OS=Homo sapiens OX=9606 GN=HNRNPUL1 PE=1 SV=2	HNRL1_HUMAN	NYILDQTNVYGSAQR	0.95
LAT3-S267+UV	S267+UV3 (F003706)	Heterogeneous nuclear ribonucleoprotein U-like protein 1 OS=Homo sapiens OX=9606 GN=HNRNPUL1 PE=1 SV=2	HNRL1_HUMAN	STNSRFENYGDKFAENDVIGCFADFECGNDVELSFTK	0.95
LAT3-S267+UV	S267+UV4 (F003707)	Heterogeneous nuclear ribonucleoprotein U-like protein 1 OS=Homo sapiens OX=9606 GN=HNRNPUL1 PE=1 SV=2	HNRL1_HUMAN	ANFTLPDVGDFLDEVLFIELQREEADKLVR	0.95
LAT3-S267+UV	S267+UV5 (F003708)	Heterogeneous nuclear ribonucleoprotein U-like protein 1 OS=Homo sapiens OX=9606 GN=HNRNPUL1 PE=1 SV=2	HNRL1_HUMAN	ANFTLPDVGDFLDEVLFIELQREEADKLVR	0.95
LAT3-S267-UV	S267-UV1 (F003709_1)	Heterogeneous nuclear ribonucleoprotein U-like protein 1 OS=Homo sapiens OX=9606 GN=HNRNPUL1 PE=1 SV=2	HNRL1_HUMAN	ANFTLPDVGDFLDEVLFIELQREEADKLVR	0.95
LAT3-S267-UV	S267-UV2 (F003710)	Heterogeneous nuclear ribonucleoprotein U-like protein 1 OS=Homo sapiens OX=9606 GN=HNRNPUL1 PE=1 SV=2	HNRL1_HUMAN	ANFTLPDVGDFLDEVLFIELQREEADKLVR	0.95
LAT3-S267-UV	S267-UV3 (F003711)	Heterogeneous nuclear ribonucleoprotein U-like protein 1 OS=Homo sapiens OX=9606 GN=HNRNPUL1 PE=1 SV=2	HNRL1_HUMAN	ANFTLPDVGDFLDEVLFIELQREEADKLVR	0.95
LAT3-S267-UV	S267-UV4 (F003712)	Heterogeneous nuclear ribonucleoprotein U-like protein 1 OS=Homo sapiens OX=9606 GN=HNRNPUL1 PE=1 SV=2	HNRL1_HUMAN	ANFTLPDVGDFLDEVLFIELQREEADKLVR	0.95
LAT3-S267-UV	S267-UV4 (F003712)	Heterogeneous nuclear ribonucleoprotein U-like protein 1 OS=Homo sapiens OX=9606 GN=HNRNPUL1 PE=1 SV=2	HNRL1_HUMAN	STNSRFENYGDKFAENDVIGCFADFECGNDVELSFTK	0.95
LAT3-S267-UV	S267-UV5 (F003713)	Heterogeneous nuclear ribonucleoprotein U-like protein 1 OS=Homo sapiens OX=9606 GN=HNRNPUL1 PE=1 SV=2	HNRL1_HUMAN	ANFTLPDVGDFLDEVLFIELQREEADKLVR	0.95
LAT3-S267+UV	S267+UV1 (F003704)	Heterogeneous nuclear ribonucleoproteins C1/C2 OS=Homo sapiens OX=9606 GN=HNRNPC PE=1 SV=4	HNRPC_HUMAN	MIAGQVLDINLAAEPK	0.95
LAT3-S267+UV	S267+UV1 (F003704)	Heterogeneous nuclear ribonucleoproteins C1/C2 OS=Homo sapiens OX=9606 GN=HNRNPC PE=1 SV=4	HNRPC_HUMAN	MIAGQVLDINLAAEPKVNR	0.95
LAT3-S267+UV	S267+UV2 (F003705)	Heterogeneous nuclear ribonucleoproteins C1/C2 OS=Homo sapiens OX=9606 GN=HNRNPC PE=1 SV=4	HNRPC_HUMAN	GFAFVQYVNER	0.95
LAT3-S267+UV	S267+UV2 (F003705)	Heterogeneous nuclear ribonucleoproteins C1/C2 OS=Homo sapiens OX=9606 GN=HNRNPC PE=1 SV=4	HNRPC_HUMAN	MIAGQVLDINLAAEPK	0.95
LAT3-S267+UV	S267+UV2 (F003705)	Heterogeneous nuclear ribonucleoproteins C1/C2 OS=Homo sapiens OX=9606 GN=HNRNPC PE=1 SV=4	HNRPC_HUMAN	MIAGQVLDINLAAEPKVNR	0.95
LAT3-S267+UV	S267+UV2 (F003705)	Heterogeneous nuclear ribonucleoproteins C1/C2 OS=Homo sapiens OX=9606 GN=HNRNPC PE=1 SV=4	HNRPC_HUMAN	VFIGNLNTLVVK	0.95
LAT3-S267+UV	S267+UV3 (F003706)	Heterogeneous nuclear ribonucleoproteins C1/C2 OS=Homo sapiens OX=9606 GN=HNRNPC PE=1 SV=4	HNRPC_HUMAN	GFAFVQYVNER	0.95
LAT3-S267+UV	S267+UV3 (F003706)	Heterogeneous nuclear ribonucleoproteins C1/C2 OS=Homo sapiens OX=9606 GN=HNRNPC PE=1 SV=4	HNRPC_HUMAN	MIAGQVLDINLAAEPK	0.95
LAT3-S267+UV	S267+UV3 (F003706)	Heterogeneous nuclear ribonucleoproteins C1/C2 OS=Homo sapiens OX=9606 GN=HNRNPC PE=1 SV=4	HNRPC_HUMAN	MIAGQVLDINLAAEPKVNR	0.95
LAT3-S267+UV	S267+UV3 (F003706)	Heterogeneous nuclear ribonucleoproteins C1/C2 OS=Homo sapiens OX=9606 GN=HNRNPC PE=1 SV=4	HNRPC_HUMAN	SAAEMYGSVTEHPSPSPLLSSSFDLDYDFQRDYYDR	0.95
LAT3-S267+UV	S267+UV4 (F003707)	Heterogeneous nuclear ribonucleoproteins C1/C2 OS=Homo sapiens OX=9606 GN=HNRNPC PE=1 SV=4	HNRPC_HUMAN	GFAFVQYVNER	0.95
LAT3-S267+UV	S267+UV4 (F003707)	Heterogeneous nuclear ribonucleoproteins C1/C2 OS=Homo sapiens OX=9606 GN=HNRNPC PE=1 SV=4	HNRPC_HUMAN	MIAGQVLDINLAAEPK	0.95
LAT3-S267+UV	S267+UV4 (F003707)	Heterogeneous nuclear ribonucleoproteins C1/C2 OS=Homo sapiens OX=9606 GN=HNRNPC PE=1 SV=4	HNRPC_HUMAN	MIAGQVLDINLAAEPKVNR	0.95
LAT3-S267+UV	S267+UV4 (F003707)	Heterogeneous nuclear ribonucleoproteins C1/C2 OS=Homo sapiens OX=9606 GN=HNRNPC PE=1 SV=4	HNRPC_HUMAN	SAAEMYGSVTEHPSPSPLLSSSFDLDYDFQRDYYDR	0.95
LAT3-S267+UV	S267+UV5 (F003708)	Heterogeneous nuclear ribonucleoproteins C1/C2 OS=Homo sapiens OX=9606 GN=HNRNPC PE=1 SV=4	HNRPC_HUMAN	GFAFVQYVNER	0.95
LAT3-S267+UV	S267+UV5 (F003708)	Heterogeneous nuclear ribonucleoproteins C1/C2 OS=Homo sapiens OX=9606 GN=HNRNPC PE=1 SV=4	HNRPC_HUMAN	MIAGQVLDINLAAEPK	0.95
LAT3-S267-UV	S267-UV1 (F003709_1)	Heterogeneous nuclear ribonucleoproteins C1/C2 OS=Homo sapiens OX=9606 GN=HNRNPC PE=1 SV=4	HNRPC_HUMAN	MIAGQVLDINLAAEPK	0.95
LAT3-S267-UV	S267-UV2 (F003710)	Heterogeneous nuclear ribonucleoproteins C1/C2 OS=Homo sapiens OX=9606 GN=HNRNPC PE=1 SV=4	HNRPC_HUMAN	MIAGQVLDINLAAEPK	0.95
LAT3-S267-UV	S267-UV3 (F003711)	Heterogeneous nuclear ribonucleoproteins C1/C2 OS=Homo sapiens OX=9606 GN=HNRNPC PE=1 SV=4	HNRPC_HUMAN	MIAGQVLDINLAAEPK	0.95
LAT3-S267-UV	S267-UV4 (F003712)	Heterogeneous nuclear ribonucleoproteins C1/C2 OS=Homo sapiens OX=9606 GN=HNRNPC PE=1 SV=4	HNRPC_HUMAN	MIAGQVLDINLAAEPK	0.95
LAT3-S267-UV	S267-UV5 (F003713)	Heterogeneous nuclear ribonucleoproteins C1/C2 OS=Homo sapiens OX=9606 GN=HNRNPC PE=1 SV=4	HNRPC_HUMAN	MIAGQVLDINLAAEPK	0.95
LAT3-S267-UV	S267-UV5 (F003713)	Heterogeneous nuclear ribonucleoproteins C1/C2 OS=Homo sapiens OX=9606 GN=HNRNPC PE=1 SV=4	HNRPC_HUMAN	MIAGQVLDINLAAEPKVNR	0.95
LAT3-S267+UV	S267+UV1 (F003704)	Heterogeneous nuclear ribonucleoprotein F OS=Homo sapiens OX=9606 GN=HNRNPF PE=1 SV=3	HNRPF_HUMAN	GLPFGCTKEEIVQFFSGLEIVPNGITLPVDPEGK	0.95
LAT3-S267+UV	S267+UV2 (F003705)	Heterogeneous nuclear ribonucleoprotein F OS=Homo sapiens OX=9606 GN=HNRNPF PE=1 SV=3	HNRPF_HUMAN	GLPFGCTKEEIVQFFSGLEIVPNGITLPVDPEGK	0.95
LAT3-S267+UV	S267+UV2 (F003705)	Heterogeneous nuclear ribonucleoprotein F OS=Homo sapiens OX=9606 GN=HNRNPF PE=1 SV=3	HNRPF_HUMAN	ITGEAFVQFASQELAEK	0.95
LAT3-S267+UV	S267+UV3 (F003706)	Heterogeneous nuclear ribonucleoprotein F OS=Homo sapiens OX=9606 GN=HNRNPF PE=1 SV=3	HNRPF_HUMAN	GLPFGCTKEEIVQFFSGLEIVPNGITLPVDPEGK	0.95
LAT3-S267+UV	S267+UV3 (F003706)	Heterogeneous nuclear ribonucleoprotein F OS=Homo sapiens OX=9606 GN=HNRNPF PE=1 SV=3	HNRPF_HUMAN	QSGEAFVELGSEDDVK	0.95
LAT3-S267+UV	S267+UV4 (F003707)	Heterogeneous nuclear ribonucleoprotein F OS=Homo sapiens OX=9606 GN=HNRNPF PE=1 SV=3	HNRPF_HUMAN	GLPFGCTKEEIVQFFSGLEIVPNGITLPVDPEGK	0.95
LAT3-S267+UV	S267+UV4 (F003707)	Heterogeneous nuclear ribonucleoprotein F OS=Homo sapiens OX=9606 GN=HNRNPF PE=1 SV=3	HNRPF_HUMAN	ITGEAFVQFASQELAEK	0.95
LAT3-S267+UV	S267+UV4 (F003707)	Heterogeneous nuclear ribonucleoprotein F OS=Homo sapiens OX=9606 GN=HNRNPF PE=1 SV=3	HNRPF_HUMAN	QSGEAFVELGSEDDVK	0.95
LAT3-S267+UV	S267+UV5 (F003708)	Heterogeneous nuclear ribonucleoprotein F OS=Homo sapiens OX=9606 GN=HNRNPF PE=1 SV=3	HNRPF_HUMAN	GLPFGCTKEEIVQFFSGLEIVPNGITLPVDPEGK	0.95
LAT3-S267+UV	S267+UV5 (F003708)	Heterogeneous nuclear ribonucleoprotein F OS=Homo sapiens OX=9606 GN=HNRNPF PE=1 SV=3	HNRPF_HUMAN	QSGEAFVELGSEDDVK	0.95
LAT3-S267-UV	S267-UV1 (F003709_1)	Heterogeneous nuclear ribonucleoprotein F OS=Homo sapiens OX=9606 GN=HNRNPF PE=1 SV=3	HNRPF_HUMAN	GLPFGCTKEEIVQFFSGLEIVPNGITLPVDPEGK	0.95
LAT3-S267-UV	S267-UV1 (F003709_1)	Heterogeneous nuclear ribonucleoprotein F OS=Homo sapiens OX=9606 GN=HNRNPF PE=1 SV=3	HNRPF_HUMAN	QSGEAFVELGSEDDVK	0.95
LAT3-S267-UV	S267-UV2 (F003710)	Heterogeneous nuclear ribonucleoprotein F OS=Homo sapiens OX=9606 GN=HNRNPF PE=1 SV=3	HNRPF_HUMAN	GLPFGCTKEEIVQFFSGLEIVPNGITLPVDPEGK	0.95
LAT3-S267-UV	S267-UV3 (F003711)	Heterogeneous nuclear ribonucleoprotein F OS=Homo sapiens OX=9606 GN=HNRNPF PE=1 SV=3	HNRPF_HUMAN	GLPFGCTKEEIVQFFSGLEIVPNGITLPVDPEGK	0.95
LAT3-S267-UV	S267-UV4 (F003712)	Heterogeneous nuclear ribonucleoprotein F OS=Homo sapiens OX=9606 GN=HNRNPF PE=1 SV=3	HNRPF_HUMAN	GLPFGCTKEEIVQFFSGLEIVPNGITLPVDPEGK	0.95
LAT3-S267-UV	S267-UV5 (F003713)	Heterogeneous nuclear ribonucleoprotein F OS=Homo sapiens OX=9606 GN=HNRNPF PE=1 SV=3	HNRPF_HUMAN	GLPFGCTKEEIVQFFSGLEIVPNGITLPVDPEGK	0.95
LAT3-S267+UV	S267+UV1 (F003704)	Heterogeneous nuclear ribonucleoprotein K OS=Homo sapiens OX=9606 GN=HNRNPK PE=1 SV=1	HNRPK_HUMAN	ALRTDYNASVSVPDSSGPER	0.95
LAT3-S267+UV	S267+UV1 (F003704)	Heterogeneous nuclear ribonucleoprotein K OS=Homo sapiens OX=9606 GN=HNRNPK PE=1 SV=1	HNRPK_HUMAN	ILSISADIETIGEILK	0.95
LAT3-S267+UV	S267+UV1 (F003704)	Heterogeneous nuclear ribonucleoprotein K OS=Homo sapiens OX=9606 GN=HNRNPK PE=1 SV=1	HNRPK_HUMAN	ILSISADIETIGEILKK	0.95
LAT3-S267+UV	S267+UV2 (F003705)	Heterogeneous nuclear ribonucleoprotein K OS=Homo sapiens OX=9606 GN=HNRNPK PE=1 SV=1	HNRPK_HUMAN	ALRTDYNASVSVPDSSGPER	0.95
LAT3-S267+UV	S267+UV2 (F003705)	Heterogeneous nuclear ribonucleoprotein K OS=Homo sapiens OX=9606 GN=HNRNPK PE=1 SV=1	HNRPK_HUMAN	ILSISADIETIGEILK	0.95
LAT3-S267+UV	S267+UV2 (F003705)	Heterogeneous nuclear ribonucleoprotein K OS=Homo sapiens OX=9606 GN=HNRNPK PE=1 SV=1	HNRPK_HUMAN	ILSISADIETIGEILKK	0.95
LAT3-S267+UV	S267+UV3 (F003706)	Heterogeneous nuclear ribonucleoprotein K OS=Homo sapiens OX=9606 GN=HNRNPK PE=1 SV=1	HNRPK_HUMAN	ALRTDYNASVSVPDSSGPER	0.95
LAT3-S267+UV	S267+UV3 (F003706)	Heterogeneous nuclear ribonucleoprotein K OS=Homo sapiens OX=9606 GN=HNRNPK PE=1 SV=1	HNRPK_HUMAN	IIPTLEEGLQLPSPTATSQLPLESDAVECLNY	0.95
LAT3-S267+UV	S267+UV3 (F003706)	Heterogeneous nuclear ribonucleoprotein K OS=Homo sapiens OX=9606 GN=HNRNPK PE=1 SV=1	HNRPK_HUMAN	ILSISADIETIGEILK	0.95
LAT3-S267+UV	S267+UV3 (F003706)	Heterogeneous nuclear ribonucleoprotein K OS=Homo sapiens OX=9606 GN=HNRNPK PE=1 SV=1	HNRPK_HUMAN	ILSISADIETIGEILKK	0.95
LAT3-S267+UV	S267+UV4 (F003707)	Heterogeneous nuclear ribonucleoprotein K OS=Homo sapiens OX=9606 GN=HNRNPK PE=1 SV=1	HNRPK_HUMAN	ALRTDYNASVSVPDSSGPER	0.95
LAT3-S267+UV	S267+UV4 (F003707)	Heterogeneous nuclear ribonucleoprotein K OS=Homo sapiens OX=9606 GN=HNRNPK PE=1 SV=1	HNRPK_HUMAN	ILSISADIETIGEILK	0.95
LAT3-S267+UV	S267+UV4 (F003707)	Heterogeneous nuclear ribonucleoprotein K OS=Homo sapiens OX=9606 GN=HNRNPK PE=1 SV=1	HNRPK_HUMAN	ILSISADIETIGEILKK	0.95
LAT3-S267+UV	S267+UV4 (F003707)	Heterogeneous nuclear ribonucleoprotein K OS=Homo sapiens OX=9606 GN=HNRNPK PE=1 SV=1	HNRPK_HUMAN	NLPLPPPPPPR	0.95
LAT3-S267+UV	S267+UV4 (F003707)	Heterogeneous nuclear ribonucleoprotein K OS=Homo sapiens OX=9606 GN=HNRNPK PE=1 SV=1	HNRPK_HUMAN	VVECIKIILDLISESPIK	0.95
LAT3-S267+UV	S267+UV5 (F003708)	Heterogeneous nuclear ribonucleoprotein K OS=Homo sapiens OX=9606 GN=HNRNPK PE=1 SV=1	HNRPK_HUMAN	ALRTDYNASVSVPDSSGPER	0.95
LAT3-S267+UV	S267+UV5 (F003708)	Heterogeneous nuclear ribonucleoprotein K OS=Homo sapiens OX=9606 GN=HNRNPK PE=1 SV=1	HNRPK_HUMAN	ILSISADIETIGEILKK	0.95
LAT3-S267-UV	S267-UV1 (F003709_1)	Heterogeneous nuclear ribonucleoprotein K OS=Homo sapiens OX=9606 GN=HNRNPK PE=1 SV=1	HNRPK_HUMAN	ALRTDYNASVSVPDSSGPER	0.95
LAT3-S267-UV	S267-UV1 (F003709_1)	Heterogeneous nuclear ribonucleoprotein K OS=Homo sapiens OX=9606 GN=HNRNPK PE=1 SV=1	HNRPK_HUMAN	ILSISADIETIGEILKK	0.95
LAT3-S267-UV	S267-UV2 (F003710)	Heterogeneous nuclear ribonucleoprotein K OS=Homo sapiens OX=9606 GN=HNRNPK PE=1 SV=1	HNRPK_HUMAN	ALRTDYNASVSVPDSSGPER	0.95
LAT3-S267-UV	S267-UV2 (F003710)	Heterogeneous nuclear ribonucleoprotein K OS=Homo sapiens OX=9606 GN=HNRNPK PE=1 SV=1	HNRPK_HUMAN	ILSISADIETIGEILKK	0.95
LAT3-S267-UV	S267-UV3 (F003711)	Heterogeneous nuclear ribonucleoprotein K OS=Homo sapiens OX=9606 GN=HNRNPK PE=1 SV=1	HNRPK_HUMAN	ALRTDYNASVSVPDSSGPER	0.95
LAT3-S267-UV	S267-UV3 (F003711)	Heterogeneous nuclear ribonucleoprotein K OS=Homo sapiens OX=9606 GN=HNRNPK PE=1 SV=1	HNRPK_HUMAN	ILSISADIETIGEILKK	0.95
LAT3-S267-UV	S267-UV3 (F003711)	Heterogeneous nuclear ribonucleoprotein K OS=Homo sapiens OX=9606 GN=HNRNPK PE=1 SV=1	HNRPK_HUMAN	LLIHQSLAGGIIGVK	0.95
LAT3-S267-UV	S267-UV3 (F003711)	Heterogeneous nuclear ribonucleoprotein K OS=Homo sapiens OX=9606 GN=HNRNPK PE=1 SV=1	HNRPK_HUMAN	VVECIKIILDLISESPIK	0.95
LAT3-S267-UV	S267-UV4 (F003712)	Heterogeneous nuclear ribonucleoprotein K OS=Homo sapiens OX=9606 GN=HNRNPK PE=1 SV=1	HNRPK_HUMAN	ALRTDYNASVSVPDSSGPER	0.95
LAT3-S267-UV	S267-UV4 (F003712)	Heterogeneous nuclear ribonucleoprotein K OS=Homo sapiens OX=9606 GN=HNRNPK PE=1 SV=1	HNRPK_HUMAN	ILSISADIETIGEILKK	0.95
LAT3-S267-UV	S267-UV5 (F003713)	Heterogeneous nuclear ribonucleoprotein K OS=Homo sapiens OX=9606 GN=HNRNPK PE=1 SV=1	HNRPK_HUMAN	ALRTDYNASVSVPDSSGPER	0.95
LAT3-S267-UV	S267-UV5 (F003713)	Heterogeneous nuclear ribonucleoprotein K OS=Homo sapiens OX=9606 GN=HNRNPK PE=1 SV=1	HNRPK_HUMAN	ILSISADIETIGEILKK	0.95
LAT3-S267-UV	S267-UV5 (F003713)	Heterogeneous nuclear ribonucleoprotein K OS=Homo sapiens OX=9606 GN=HNRNPK PE=1 SV=1	HNRPK_HUMAN	VVECIKIILDLISESPIK	0.95
LAT3-S267+UV	S267+UV1 (F003704)	Heterogeneous nuclear ribonucleoprotein L OS=Homo sapiens OX=9606 GN=HNRNPL PE=1 SV=2	HNRPL_HUMAN	KNGVQAMVEFDSVQSAQR	0.95
LAT3-S267+UV	S267+UV1 (F003704)	Heterogeneous nuclear ribonucleoprotein L OS=Homo sapiens OX=9606 GN=HNRNPL PE=1 SV=2	HNRPL_HUMAN	NGVQAMVEFDSVQSAQR	0.95
LAT3-S267+UV	S267+UV1 (F003704)	Heterogeneous nuclear ribonucleoprotein L OS=Homo sapiens OX=9606 GN=HNRNPL PE=1 SV=2	HNRPL_HUMAN	TILNPIYSITTDVLYTICNPCGPVQR	0.95
LAT3-S267+UV	S267+UV2 (F003705)	Heterogeneous nuclear ribonucleoprotein L OS=Homo sapiens OX=9606 GN=HNRNPL PE=1 SV=2	HNRPL_HUMAN	KNGVQAMVEFDSVQSAQR	0.95
LAT3-S267+UV	S267+UV2 (F003705)	Heterogeneous nuclear ribonucleoprotein L OS=Homo sapiens OX=9606 GN=HNRNPL PE=1 SV=2	HNRPL_HUMAN	NGVQAMVEFDSVQSAQR	0.95
LAT3-S267+UV	S267+UV2 (F003705)	Heterogeneous nuclear ribonucleoprotein L OS=Homo sapiens OX=9606 GN=HNRNPL PE=1 SV=2	HNRPL_HUMAN	SSSGLLEWESKSDALETLGFLNHY	0.95
LAT3-S267+UV	S267+UV3 (F003706)	Heterogeneous nuclear ribonucleoprotein L OS=Homo sapiens OX=9606 GN=HNRNPL PE=1 SV=2	HNRPL_HUMAN	IQHPSNVLHFFNAPLEVTEENFFEICDELGVKRPSSVK	0.95
LAT3-S267+UV	S267+UV3 (F003706)	Heterogeneous nuclear ribonucleoprotein L OS=Homo sapiens OX=9606 GN=HNRNPL PE=1 SV=2	HNRPL_HUMAN	KNGVQAMVEFDSVQSAQR	0.95
LAT3-S267+UV	S267+UV3 (F003706)	Heterogeneous nuclear ribonucleoprotein L OS=Homo sapiens OX=9606 GN=HNRNPL PE=1 SV=2	HNRPL_HUMAN	NGVQAMVEFDSVQSAQR	0.95
LAT3-S267+UV	S267+UV3 (F003706)	Heterogeneous nuclear ribonucleoprotein L OS=Homo sapiens OX=9606 GN=HNRNPL PE=1 SV=2	HNRPL_HUMAN	SVNSVLLFTILNPIYSITTDVLYTICNPCGPVQR	0.95
LAT3-S267+UV	S267+UV4 (F003707)	Heterogeneous nuclear ribonucleoprotein L OS=Homo sapiens OX=9606 GN=HNRNPL PE=1 SV=2	HNRPL_HUMAN	IQHPSNVLHFFNAPLEVTEENFFEICDELGVK	0.95
LAT3-S267+UV	S267+UV4 (F003707)	Heterogeneous nuclear ribonucleoprotein L OS=Homo sapiens OX=9606 GN=HNRNPL PE=1 SV=2	HNRPL_HUMAN	KNGVQAMVEFDSVQSAQR	0.95
LAT3-S267+UV	S267+UV4 (F003707)	Heterogeneous nuclear ribonucleoprotein L OS=Homo sapiens OX=9606 GN=HNRNPL PE=1 SV=2	HNRPL_HUMAN	NGVQAMVEFDSVQSAQR	0.95
LAT3-S267+UV	S267+UV4 (F003707)	Heterogeneous nuclear ribonucleoprotein L OS=Homo sapiens OX=9606 GN=HNRNPL PE=1 SV=2	HNRPL_HUMAN	TILNPIYSITTDVLYTICNPCGPVQR	0.95
LAT3-S267+UV	S267+UV5 (F003708)	Heterogeneous nuclear ribonucleoprotein L OS=Homo sapiens OX=9606 GN=HNRNPL PE=1 SV=2	HNRPL_HUMAN	KNGVQAMVEFDSVQSAQR	0.95
LAT3-S267+UV	S267+UV5 (F003708)	Heterogeneous nuclear ribonucleoprotein L OS=Homo sapiens OX=9606 GN=HNRNPL PE=1 SV=2	HNRPL_HUMAN	NGVQAMVEFDSVQSAQR	0.95
LAT3-S267-UV	S267-UV4 (F003712)	Heterogeneous nuclear ribonucleoprotein L OS=Homo sapiens OX=9606 GN=HNRNPL PE=1 SV=2	HNRPL_HUMAN	NGVQAMVEFDSVQSAQR	0.95
LAT3-S267-UV	S267-UV5 (F003713)	Heterogeneous nuclear ribonucleoprotein L OS=Homo sapiens OX=9606 GN=HNRNPL PE=1 SV=2	HNRPL_HUMAN	NGVQAMVEFDSVQSAQR	0.95
LAT3-S267+UV	S267+UV2 (F003705)	Heterogeneous nuclear ribonucleoprotein M OS=Homo sapiens OX=9606 GN=HNRNPM PE=1 SV=3	HNRPM_HUMAN	GNFGGSFAGSFGGAGGHAPGVAR	0.95
LAT3-S267+UV	S267+UV3 (F003706)	Heterogeneous nuclear ribonucleoprotein M OS=Homo sapiens OX=9606 GN=HNRNPM PE=1 SV=3	HNRPM_HUMAN	GNFGGSFAGSFGGAGGHAPGVAR	0.95
LAT3-S267+UV	S267+UV3 (F003706)	Heterogeneous nuclear ribonucleoprotein M OS=Homo sapiens OX=9606 GN=HNRNPM PE=1 SV=3	HNRPM_HUMAN	MGLAMGGGGGASFDR	0.95
LAT3-S267+UV	S267+UV4 (F003707)	Heterogeneous nuclear ribonucleoprotein M OS=Homo sapiens OX=9606 GN=HNRNPM PE=1 SV=3	HNRPM_HUMAN	MGLAMGGGGGASFDR	0.95
LAT3-S267+UV	S267+UV3 (F003706)	Heterogeneous nuclear ribonucleoprotein R OS=Homo sapiens OX=9606 GN=HNRNPR PE=1 SV=1	HNRPR_HUMAN	NLATTVTEEILEKSFSEFGKLER	0.95
LAT3-S267+UV	S267+UV3 (F003706)	Heterogeneous nuclear ribonucleoprotein R OS=Homo sapiens OX=9606 GN=HNRNPR PE=1 SV=1	HNRPR_HUMAN	TGYTLDVTTGQR	0.95
LAT3-S267+UV	S267+UV4 (F003707)	Heterogeneous nuclear ribonucleoprotein R OS=Homo sapiens OX=9606 GN=HNRNPR PE=1 SV=1	HNRPR_HUMAN	DLYEDELVPLFEKAGPIWDLR	0.95
LAT3-S267-UV	S267-UV1 (F003709_1)	Heterogeneous nuclear ribonucleoprotein R OS=Homo sapiens OX=9606 GN=HNRNPR PE=1 SV=1	HNRPR_HUMAN	TGYTLDVTTGQR	0.95
LAT3-S267-UV	S267-UV3 (F003711)	Heterogeneous nuclear ribonucleoprotein R OS=Homo sapiens OX=9606 GN=HNRNPR PE=1 SV=1	HNRPR_HUMAN	DLYEDELVPLFEKAGPIWDLR	0.95
LAT3-S267-UV	S267-UV5 (F003713)	Heterogeneous nuclear ribonucleoprotein R OS=Homo sapiens OX=9606 GN=HNRNPR PE=1 SV=1	HNRPR_HUMAN	TGYTLDVTTGQR	0.95
LAT3-S267+UV	S267+UV1 (F003704)	Heterogeneous nuclear ribonucleoprotein U OS=Homo sapiens OX=9606 GN=HNRNPU PE=1 SV=6	HNRPU_HUMAN	MKGNFTLPEVAECFDEITYVELQKEEAQK	0.95
LAT3-S267+UV	S267+UV1 (F003704)	Heterogeneous nuclear ribonucleoprotein U OS=Homo sapiens OX=9606 GN=HNRNPU PE=1 SV=6	HNRPU_HUMAN	NFILDQTNVSAAAQR	0.95
LAT3-S267+UV	S267+UV2 (F003705)	Heterogeneous nuclear ribonucleoprotein U OS=Homo sapiens OX=9606 GN=HNRNPU PE=1 SV=6	HNRPU_HUMAN	GNFTLPEVAECFDEITYVELQKEEAQK	0.95
LAT3-S267+UV	S267+UV2 (F003705)	Heterogeneous nuclear ribonucleoprotein U OS=Homo sapiens OX=9606 GN=HNRNPU PE=1 SV=6	HNRPU_HUMAN	MKGNFTLPEVAECFDEITYVELQKEEAQK	0.95
LAT3-S267+UV	S267+UV2 (F003705)	Heterogeneous nuclear ribonucleoprotein U OS=Homo sapiens OX=9606 GN=HNRNPU PE=1 SV=6	HNRPU_HUMAN	NFILDQTNVSAAAQR	0.95
LAT3-S267+UV	S267+UV3 (F003706)	Heterogeneous nuclear ribonucleoprotein U OS=Homo sapiens OX=9606 GN=HNRNPU PE=1 SV=6	HNRPU_HUMAN	GNFTLPEVAECFDEITYVELQKEEAQK	0.95
LAT3-S267+UV	S267+UV3 (F003706)	Heterogeneous nuclear ribonucleoprotein U OS=Homo sapiens OX=9606 GN=HNRNPU PE=1 SV=6	HNRPU_HUMAN	MKGNFTLPEVAECFDEITYVELQKEEAQK	0.95
LAT3-S267+UV	S267+UV3 (F003706)	Heterogeneous nuclear ribonucleoprotein U OS=Homo sapiens OX=9606 GN=HNRNPU PE=1 SV=6	HNRPU_HUMAN	NFILDQTNVSAAAQR	0.95
LAT3-S267+UV	S267+UV4 (F003707)	Heterogeneous nuclear ribonucleoprotein U OS=Homo sapiens OX=9606 GN=HNRNPU PE=1 SV=6	HNRPU_HUMAN	GNFTLPEVAECFDEITYVELQKEEAQK	0.95
LAT3-S267+UV	S267+UV4 (F003707)	Heterogeneous nuclear ribonucleoprotein U OS=Homo sapiens OX=9606 GN=HNRNPU PE=1 SV=6	HNRPU_HUMAN	MKGNFTLPEVAECFDEITYVELQKEEAQK	0.95
LAT3-S267+UV	S267+UV4 (F003707)	Heterogeneous nuclear ribonucleoprotein U OS=Homo sapiens OX=9606 GN=HNRNPU PE=1 SV=6	HNRPU_HUMAN	NFILDQTNVSAAAQR	0.95
LAT3-S267+UV	S267+UV5 (F003708)	Heterogeneous nuclear ribonucleoprotein U OS=Homo sapiens OX=9606 GN=HNRNPU PE=1 SV=6	HNRPU_HUMAN	GNFTLPEVAECFDEITYVELQKEEAQK	0.95
LAT3-S267+UV	S267+UV5 (F003708)	Heterogeneous nuclear ribonucleoprotein U OS=Homo sapiens OX=9606 GN=HNRNPU PE=1 SV=6	HNRPU_HUMAN	MKGNFTLPEVAECFDEITYVELQKEEAQK	0.95
LAT3-S267+UV	S267+UV5 (F003708)	Heterogeneous nuclear ribonucleoprotein U OS=Homo sapiens OX=9606 GN=HNRNPU PE=1 SV=6	HNRPU_HUMAN	NFILDQTNVSAAAQR	0.95
LAT3-S267-UV	S267-UV1 (F003709_1)	Heterogeneous nuclear ribonucleoprotein U OS=Homo sapiens OX=9606 GN=HNRNPU PE=1 SV=6	HNRPU_HUMAN	MKGNFTLPEVAECFDEITYVELQKEEAQK	0.95
LAT3-S267-UV	S267-UV1 (F003709_1)	Heterogeneous nuclear ribonucleoprotein U OS=Homo sapiens OX=9606 GN=HNRNPU PE=1 SV=6	HNRPU_HUMAN	NFILDQTNVSAAAQR	0.95
LAT3-S267-UV	S267-UV2 (F003710)	Heterogeneous nuclear ribonucleoprotein U OS=Homo sapiens OX=9606 GN=HNRNPU PE=1 SV=6	HNRPU_HUMAN	MKGNFTLPEVAECFDEITYVELQKEEAQK	0.95
LAT3-S267-UV	S267-UV2 (F003710)	Heterogeneous nuclear ribonucleoprotein U OS=Homo sapiens OX=9606 GN=HNRNPU PE=1 SV=6	HNRPU_HUMAN	NFILDQTNVSAAAQR	0.95
LAT3-S267-UV	S267-UV3 (F003711)	Heterogeneous nuclear ribonucleoprotein U OS=Homo sapiens OX=9606 GN=HNRNPU PE=1 SV=6	HNRPU_HUMAN	NFILDQTNVSAAAQR	0.95
LAT3-S267-UV	S267-UV4 (F003712)	Heterogeneous nuclear ribonucleoprotein U OS=Homo sapiens OX=9606 GN=HNRNPU PE=1 SV=6	HNRPU_HUMAN	NFILDQTNVSAAAQR	0.95
LAT3-S267-UV	S267-UV5 (F003713)	Heterogeneous nuclear ribonucleoprotein U OS=Homo sapiens OX=9606 GN=HNRNPU PE=1 SV=6	HNRPU_HUMAN	EKPYFPIPEEYTFIQNVPLEDR	0.95
LAT3-S267-UV	S267-UV5 (F003713)	Heterogeneous nuclear ribonucleoprotein U OS=Homo sapiens OX=9606 GN=HNRNPU PE=1 SV=6	HNRPU_HUMAN	NFILDQTNVSAAAQR	0.95
LAT3-S267+UV	S267+UV2 (F003705)	Eukaryotic initiation factor 4A-III OS=Homo sapiens OX=9606 GN=EIF4A3 PE=1 SV=4	IF4A3_HUMAN	DIEQYYSTQIDEMPMNVADLI	0.95
LAT3-S267+UV	S267+UV2 (F003705)	Eukaryotic initiation factor 4A-III OS=Homo sapiens OX=9606 GN=EIF4A3 PE=1 SV=4	IF4A3_HUMAN	YLPPATQVVLISATLPHEILEMTNKFMTDPIR	0.95
LAT3-S267+UV	S267+UV4 (F003707)	Eukaryotic initiation factor 4A-III OS=Homo sapiens OX=9606 GN=EIF4A3 PE=1 SV=4	IF4A3_HUMAN	YLPPATQVVLISATLPHEILEMTNKFMTDPIR	0.95
LAT3-S267+UV	S267+UV5 (F003708)	Eukaryotic initiation factor 4A-III OS=Homo sapiens OX=9606 GN=EIF4A3 PE=1 SV=4	IF4A3_HUMAN	YLPPATQVVLISATLPHEILEMTNKFMTDPIR	0.95
LAT3-S267+UV	S267+UV2 (F003705)	Keratin, type II cytoskeletal 1 OS=Homo sapiens OX=9606 GN=KRT1 PE=1 SV=6	K2C1_HUMAN	FLEQQNQVLQTKWELLQQVDTSTR	0.95
LAT3-S267-UV	S267-UV4 (F003712)	Keratin, type II cytoskeletal 1 OS=Homo sapiens OX=9606 GN=KRT1 PE=1 SV=6	K2C1_HUMAN	FSSCGGGGGSFGAGGGFGSR	0.95
LAT3-S267-UV	S267-UV4 (F003712)	Keratin, type II cytoskeletal 1 OS=Homo sapiens OX=9606 GN=KRT1 PE=1 SV=6	K2C1_HUMAN	LDNLQQEIDFLTALYQAELSQMQTQISETNVILSMDNNR	0.95
LAT3-S267+UV	S267+UV1 (F003704)	DNA-dependent protein kinase catalytic subunit OS=Homo sapiens OX=9606 GN=PRKDC PE=1 SV=3	PRKDC_HUMAN	EFREEESLVEQFVFEALVIYMESLALAHADEK	0.95
LAT3-S267+UV	S267+UV1 (F003704)	DNA-dependent protein kinase catalytic subunit OS=Homo sapiens OX=9606 GN=PRKDC PE=1 SV=3	PRKDC_HUMAN	LQSVQALTEIQEFISFISK	0.95
LAT3-S267+UV	S267+UV2 (F003705)	DNA-dependent protein kinase catalytic subunit OS=Homo sapiens OX=9606 GN=PRKDC PE=1 SV=3	PRKDC_HUMAN	KFLDALELSQSPMLLELMTEVLCR	0.95
LAT3-S267+UV	S267+UV2 (F003705)	DNA-dependent protein kinase catalytic subunit OS=Homo sapiens OX=9606 GN=PRKDC PE=1 SV=3	PRKDC_HUMAN	LGLIEWLENTVTLKDLLLNTMSQEEK	0.95
LAT3-S267+UV	S267+UV2 (F003705)	DNA-dependent protein kinase catalytic subunit OS=Homo sapiens OX=9606 GN=PRKDC PE=1 SV=3	PRKDC_HUMAN	LQSVQALTEIQEFISFISK	0.95
LAT3-S267+UV	S267+UV3 (F003706)	DNA-dependent protein kinase catalytic subunit OS=Homo sapiens OX=9606 GN=PRKDC PE=1 SV=3	PRKDC_HUMAN	EFREEESLVEQFVFEALVIYMESLALAHADEK	0.95
LAT3-S267+UV	S267+UV3 (F003706)	DNA-dependent protein kinase catalytic subunit OS=Homo sapiens OX=9606 GN=PRKDC PE=1 SV=3	PRKDC_HUMAN	LGLIEWLENTVTLKDLLLNTMSQEEK	0.95
LAT3-S267+UV	S267+UV3 (F003706)	DNA-dependent protein kinase catalytic subunit OS=Homo sapiens OX=9606 GN=PRKDC PE=1 SV=3	PRKDC_HUMAN	LQSVQALTEIQEFISFISK	0.95
LAT3-S267+UV	S267+UV4 (F003707)	DNA-dependent protein kinase catalytic subunit OS=Homo sapiens OX=9606 GN=PRKDC PE=1 SV=3	PRKDC_HUMAN	LGLIEWLENTVTLKDLLLNTMSQEEK	0.95
LAT3-S267+UV	S267+UV4 (F003707)	DNA-dependent protein kinase catalytic subunit OS=Homo sapiens OX=9606 GN=PRKDC PE=1 SV=3	PRKDC_HUMAN	LQSVQALTEIQEFISFISK	0.95
LAT3-S267+UV	S267+UV4 (F003707)	DNA-dependent protein kinase catalytic subunit OS=Homo sapiens OX=9606 GN=PRKDC PE=1 SV=3	PRKDC_HUMAN	SKLDQGGVIQDFINALDQLSNPELLFKDWSNDVR	0.95
LAT3-S267+UV	S267+UV5 (F003708)	DNA-dependent protein kinase catalytic subunit OS=Homo sapiens OX=9606 GN=PRKDC PE=1 SV=3	PRKDC_HUMAN	LQSVQALTEIQEFISFISK	0.95
LAT3-S267+UV	S267+UV5 (F003708)	DNA-dependent protein kinase catalytic subunit OS=Homo sapiens OX=9606 GN=PRKDC PE=1 SV=3	PRKDC_HUMAN	LTKLQSVQALTEIQEFISFISK	0.95
LAT3-S267-UV	S267-UV2 (F003710)	DNA-dependent protein kinase catalytic subunit OS=Homo sapiens OX=9606 GN=PRKDC PE=1 SV=3	PRKDC_HUMAN	LQSVQALTEIQEFISFISK	0.95
LAT3-S267-UV	S267-UV3 (F003711)	DNA-dependent protein kinase catalytic subunit OS=Homo sapiens OX=9606 GN=PRKDC PE=1 SV=3	PRKDC_HUMAN	LGLIEWLENTVTLKDLLLNTMSQEEK	0.95
LAT3-S267-UV	S267-UV3 (F003711)	DNA-dependent protein kinase catalytic subunit OS=Homo sapiens OX=9606 GN=PRKDC PE=1 SV=3	PRKDC_HUMAN	LQSVQALTEIQEFISFISK	0.95
LAT3-S267-UV	S267-UV4 (F003712)	DNA-dependent protein kinase catalytic subunit OS=Homo sapiens OX=9606 GN=PRKDC PE=1 SV=3	PRKDC_HUMAN	LQSVQALTEIQEFISFISK	0.95
LAT3-S267-UV	S267-UV5 (F003713)	DNA-dependent protein kinase catalytic subunit OS=Homo sapiens OX=9606 GN=PRKDC PE=1 SV=3	PRKDC_HUMAN	LQSVQALTEIQEFISFISK	0.95
LAT3-S267+UV	S267+UV1 (F003704)	Pre-mRNA-processing factor 19 OS=Homo sapiens OX=9606 GN=PRPF19 PE=1 SV=1	PRP19_HUMAN	AHESAVTGLSLHATGDYLLSSSDDQYWAFSDIQTGR	0.95
LAT3-S267+UV	S267+UV2 (F003705)	Pre-mRNA-processing factor 19 OS=Homo sapiens OX=9606 GN=PRPF19 PE=1 SV=1	PRP19_HUMAN	AHESAVTGLSLHATGDYLLSSSDDQYWAFSDIQTGR	0.95
LAT3-S267+UV	S267+UV2 (F003705)	Pre-mRNA-processing factor 19 OS=Homo sapiens OX=9606 GN=PRPF19 PE=1 SV=1	PRP19_HUMAN	EALATLKPQAGLIVPQAVPSSQPSVVGAGEPMDLGELVGMTPEIIQKLQDK	0.95
LAT3-S267+UV	S267+UV3 (F003706)	Pre-mRNA-processing factor 19 OS=Homo sapiens OX=9606 GN=PRPF19 PE=1 SV=1	PRP19_HUMAN	AHESAVTGLSLHATGDYLLSSSDDQYWAFSDIQTGR	0.95
LAT3-S267+UV	S267+UV4 (F003707)	Pre-mRNA-processing factor 19 OS=Homo sapiens OX=9606 GN=PRPF19 PE=1 SV=1	PRP19_HUMAN	AHESAVTGLSLHATGDYLLSSSDDQYWAFSDIQTGR	0.95
LAT3-S267+UV	S267+UV5 (F003708)	Pre-mRNA-processing factor 19 OS=Homo sapiens OX=9606 GN=PRPF19 PE=1 SV=1	PRP19_HUMAN	EALATLKPQAGLIVPQAVPSSQPSVVGAGEPMDLGELVGMTPEIIQKLQDK	0.95
LAT3-S267+UV	S267+UV1 (F003704)	Pre-mRNA-processing-splicing factor 8 OS=Homo sapiens OX=9606 GN=PRPF8 PE=1 SV=2	PRP8_HUMAN	TDMIQALGGVEGILEHTLFK	0.95
LAT3-S267+UV	S267+UV2 (F003705)	Pre-mRNA-processing-splicing factor 8 OS=Homo sapiens OX=9606 GN=PRPF8 PE=1 SV=2	PRP8_HUMAN	TDMIQALGGVEGILEHTLFK	0.95
LAT3-S267+UV	S267+UV3 (F003706)	Pre-mRNA-processing-splicing factor 8 OS=Homo sapiens OX=9606 GN=PRPF8 PE=1 SV=2	PRP8_HUMAN	LGNVDAFQLADGLQYIFAHVGQLTGMYR	0.95
LAT3-S267+UV	S267+UV3 (F003706)	Pre-mRNA-processing-splicing factor 8 OS=Homo sapiens OX=9606 GN=PRPF8 PE=1 SV=2	PRP8_HUMAN	TDMIQALGGVEGILEHTLFK	0.95
LAT3-S267+UV	S267+UV4 (F003707)	Pre-mRNA-processing-splicing factor 8 OS=Homo sapiens OX=9606 GN=PRPF8 PE=1 SV=2	PRP8_HUMAN	TDMIQALGGVEGILEHTLFK	0.95
LAT3-S267+UV	S267+UV5 (F003708)	Pre-mRNA-processing-splicing factor 8 OS=Homo sapiens OX=9606 GN=PRPF8 PE=1 SV=2	PRP8_HUMAN	TDMIQALGGVEGILEHTLFK	0.95
LAT3-S267-UV	S267-UV2 (F003710)	Pre-mRNA-processing-splicing factor 8 OS=Homo sapiens OX=9606 GN=PRPF8 PE=1 SV=2	PRP8_HUMAN	TDMIQALGGVEGILEHTLFK	0.95
LAT3-S267-UV	S267-UV3 (F003711)	Pre-mRNA-processing-splicing factor 8 OS=Homo sapiens OX=9606 GN=PRPF8 PE=1 SV=2	PRP8_HUMAN	TDMIQALGGVEGILEHTLFK	0.95
LAT3-S267-UV	S267-UV5 (F003713)	Pre-mRNA-processing-splicing factor 8 OS=Homo sapiens OX=9606 GN=PRPF8 PE=1 SV=2	PRP8_HUMAN	TDMIQALGGVEGILEHTLFK	0.95
LAT3-S267+UV	S267+UV4 (F003707)	Polypyrimidine tract-binding protein 1 OS=Homo sapiens OX=9606 GN=PTBP1 PE=1 SV=1	PTBP1_HUMAN	AQAALQAVNSVQSGNLALAASAAAVDAGMAMAGQSPVLR	0.95
LAT3-S267+UV	S267+UV4 (F003707)	Polypyrimidine tract-binding protein 1 OS=Homo sapiens OX=9606 GN=PTBP1 PE=1 SV=1	PTBP1_HUMAN	IIVENLFYPVTLDVLHQIFSK	0.95
LAT3-S267+UV	S267+UV4 (F003707)	Polypyrimidine tract-binding protein 1 OS=Homo sapiens OX=9606 GN=PTBP1 PE=1 SV=1	PTBP1_HUMAN	KLPIDVTEGEVISLGLPFGKVTNLLMLK	0.95
LAT3-S267-UV	S267-UV2 (F003710)	Polypyrimidine tract-binding protein 1 OS=Homo sapiens OX=9606 GN=PTBP1 PE=1 SV=1	PTBP1_HUMAN	IIVENLFYPVTLDVLHQIFSK	0.95
LAT3-S267-UV	S267-UV2 (F003710)	Polypyrimidine tract-binding protein 1 OS=Homo sapiens OX=9606 GN=PTBP1 PE=1 SV=1	PTBP1_HUMAN	IIVENLFYPVTLDVLHQIFSKFGTVLK	0.95
LAT3-S267-UV	S267-UV3 (F003711)	Polypyrimidine tract-binding protein 1 OS=Homo sapiens OX=9606 GN=PTBP1 PE=1 SV=1	PTBP1_HUMAN	AQAALQAVNSVQSGNLALAASAAAVDAGMAMAGQSPVLR	0.95
LAT3-S267-UV	S267-UV5 (F003713)	Polypyrimidine tract-binding protein 1 OS=Homo sapiens OX=9606 GN=PTBP1 PE=1 SV=1	PTBP1_HUMAN	AQAALQAVNSVQSGNLALAASAAAVDAGMAMAGQSPVLR	0.95
LAT3-S267-UV	S267-UV5 (F003713)	Polypyrimidine tract-binding protein 1 OS=Homo sapiens OX=9606 GN=PTBP1 PE=1 SV=1	PTBP1_HUMAN	IIVENLFYPVTLDVLHQIFSKFGTVLK	0.95
LAT3-S267+UV	S267+UV1 (F003704)	60S ribosomal protein L18 OS=Homo sapiens OX=9606 GN=RPL18 PE=1 SV=2	RL18_HUMAN	TAVVVGTITDDVR	0.95
LAT3-S267+UV	S267+UV1 (F003704)	60S ribosomal protein L18 OS=Homo sapiens OX=9606 GN=RPL18 PE=1 SV=2	RL18_HUMAN	TAVVVGTITDDVRVQEVPK	0.95
LAT3-S267+UV	S267+UV2 (F003705)	60S ribosomal protein L18 OS=Homo sapiens OX=9606 GN=RPL18 PE=1 SV=2	RL18_HUMAN	TAVVVGTITDDVR	0.95
LAT3-S267+UV	S267+UV3 (F003706)	60S ribosomal protein L18 OS=Homo sapiens OX=9606 GN=RPL18 PE=1 SV=2	RL18_HUMAN	TAVVVGTITDDVR	0.95
LAT3-S267+UV	S267+UV4 (F003707)	60S ribosomal protein L18 OS=Homo sapiens OX=9606 GN=RPL18 PE=1 SV=2	RL18_HUMAN	TAVVVGTITDDVR	0.95
LAT3-S267+UV	S267+UV4 (F003707)	60S ribosomal protein L18 OS=Homo sapiens OX=9606 GN=RPL18 PE=1 SV=2	RL18_HUMAN	TAVVVGTITDDVRVQEVPK	0.95
LAT3-S267+UV	S267+UV5 (F003708)	60S ribosomal protein L18 OS=Homo sapiens OX=9606 GN=RPL18 PE=1 SV=2	RL18_HUMAN	TAVVVGTITDDVRVQEVPK	0.95
LAT3-S267-UV	S267-UV1 (F003709_1)	60S ribosomal protein L18 OS=Homo sapiens OX=9606 GN=RPL18 PE=1 SV=2	RL18_HUMAN	TAVVVGTITDDVRVQEVPK	0.947
LAT3-S267+UV	S267+UV4 (F003707)	60S ribosomal protein L6 OS=Homo sapiens OX=9606 GN=RPL6 PE=1 SV=3	RL6_HUMAN	QLASGLLLVTGPLVLNR	0.95
LAT3-S267+UV	S267+UV4 (F003707)	60S ribosomal protein L6 OS=Homo sapiens OX=9606 GN=RPL6 PE=1 SV=3	RL6_HUMAN	VVFLKQLASGLLLVTGPLVLNRVPLR	0.95
LAT3-S267+UV	S267+UV5 (F003708)	60S ribosomal protein L6 OS=Homo sapiens OX=9606 GN=RPL6 PE=1 SV=3	RL6_HUMAN	VVFLKQLASGLLLVTGPLVLNRVPLR	0.95
LAT3-S267+UV	S267+UV1 (F003704)	Heterogeneous nuclear ribonucleoprotein A0 OS=Homo sapiens OX=9606 GN=HNRNPA0 PE=1 SV=1	ROA0_HUMAN	CFGFVTYSNVEEADAAMAASPHAVDGNTVELKR	0.95
LAT3-S267+UV	S267+UV1 (F003704)	Heterogeneous nuclear ribonucleoprotein A0 OS=Homo sapiens OX=9606 GN=HNRNPA0 PE=1 SV=1	ROA0_HUMAN	GHFEAFGTLTDCVVVVNPQTK	0.95
LAT3-S267+UV	S267+UV2 (F003705)	Heterogeneous nuclear ribonucleoprotein A0 OS=Homo sapiens OX=9606 GN=HNRNPA0 PE=1 SV=1	ROA0_HUMAN	CFGFVTYSNVEEADAAMAASPHAVDGNTVELKR	0.95
LAT3-S267+UV	S267+UV2 (F003705)	Heterogeneous nuclear ribonucleoprotein A0 OS=Homo sapiens OX=9606 GN=HNRNPA0 PE=1 SV=1	ROA0_HUMAN	GHFEAFGTLTDCVVVVNPQTK	0.95
LAT3-S267+UV	S267+UV2 (F003705)	Heterogeneous nuclear ribonucleoprotein A0 OS=Homo sapiens OX=9606 GN=HNRNPA0 PE=1 SV=1	ROA0_HUMAN	LFIGGLNVQTSESGLR	0.95
LAT3-S267+UV	S267+UV3 (F003706)	Heterogeneous nuclear ribonucleoprotein A0 OS=Homo sapiens OX=9606 GN=HNRNPA0 PE=1 SV=1	ROA0_HUMAN	CFGFVTYSNVEEADAAMAASPHAVDGNTVELKR	0.95
LAT3-S267+UV	S267+UV3 (F003706)	Heterogeneous nuclear ribonucleoprotein A0 OS=Homo sapiens OX=9606 GN=HNRNPA0 PE=1 SV=1	ROA0_HUMAN	GHFEAFGTLTDCVVVVNPQTK	0.95
LAT3-S267+UV	S267+UV3 (F003706)	Heterogeneous nuclear ribonucleoprotein A0 OS=Homo sapiens OX=9606 GN=HNRNPA0 PE=1 SV=1	ROA0_HUMAN	GHFEAFGTLTDCVVVVNPQTKR	0.95
LAT3-S267+UV	S267+UV4 (F003707)	Heterogeneous nuclear ribonucleoprotein A0 OS=Homo sapiens OX=9606 GN=HNRNPA0 PE=1 SV=1	ROA0_HUMAN	CFGFVTYSNVEEADAAMAASPHAVDGNTVELKR	0.95
LAT3-S267+UV	S267+UV4 (F003707)	Heterogeneous nuclear ribonucleoprotein A0 OS=Homo sapiens OX=9606 GN=HNRNPA0 PE=1 SV=1	ROA0_HUMAN	LFIGGLNVQTSESGLR	0.95
LAT3-S267+UV	S267+UV5 (F003708)	Heterogeneous nuclear ribonucleoprotein A0 OS=Homo sapiens OX=9606 GN=HNRNPA0 PE=1 SV=1	ROA0_HUMAN	CFGFVTYSNVEEADAAMAASPHAVDGNTVELKR	0.95
LAT3-S267+UV	S267+UV5 (F003708)	Heterogeneous nuclear ribonucleoprotein A0 OS=Homo sapiens OX=9606 GN=HNRNPA0 PE=1 SV=1	ROA0_HUMAN	GHFEAFGTLTDCVVVVNPQTK	0.95
LAT3-S267-UV	S267-UV1 (F003709_1)	Heterogeneous nuclear ribonucleoprotein A0 OS=Homo sapiens OX=9606 GN=HNRNPA0 PE=1 SV=1	ROA0_HUMAN	CFGFVTYSNVEEADAAMAASPHAVDGNTVELKR	0.95
LAT3-S267-UV	S267-UV2 (F003710)	Heterogeneous nuclear ribonucleoprotein A0 OS=Homo sapiens OX=9606 GN=HNRNPA0 PE=1 SV=1	ROA0_HUMAN	CFGFVTYSNVEEADAAMAASPHAVDGNTVELKR	0.95
LAT3-S267-UV	S267-UV2 (F003710)	Heterogeneous nuclear ribonucleoprotein A0 OS=Homo sapiens OX=9606 GN=HNRNPA0 PE=1 SV=1	ROA0_HUMAN	GHFEAFGTLTDCVVVVNPQTK	0.95
LAT3-S267-UV	S267-UV3 (F003711)	Heterogeneous nuclear ribonucleoprotein A0 OS=Homo sapiens OX=9606 GN=HNRNPA0 PE=1 SV=1	ROA0_HUMAN	CFGFVTYSNVEEADAAMAASPHAVDGNTVELKR	0.95
LAT3-S267-UV	S267-UV4 (F003712)	Heterogeneous nuclear ribonucleoprotein A0 OS=Homo sapiens OX=9606 GN=HNRNPA0 PE=1 SV=1	ROA0_HUMAN	CFGFVTYSNVEEADAAMAASPHAVDGNTVELKR	0.95
LAT3-S267-UV	S267-UV4 (F003712)	Heterogeneous nuclear ribonucleoprotein A0 OS=Homo sapiens OX=9606 GN=HNRNPA0 PE=1 SV=1	ROA0_HUMAN	GHFEAFGTLTDCVVVVNPQTK	0.95
LAT3-S267-UV	S267-UV4 (F003712)	Heterogeneous nuclear ribonucleoprotein A0 OS=Homo sapiens OX=9606 GN=HNRNPA0 PE=1 SV=1	ROA0_HUMAN	LFIGGLNVQTSESGLRGHFEAFGTLTDCVVVVNPQTK	0.95
LAT3-S267-UV	S267-UV5 (F003713)	Heterogeneous nuclear ribonucleoprotein A0 OS=Homo sapiens OX=9606 GN=HNRNPA0 PE=1 SV=1	ROA0_HUMAN	CFGFVTYSNVEEADAAMAASPHAVDGNTVELKR	0.95
LAT3-S267-UV	S267-UV5 (F003713)	Heterogeneous nuclear ribonucleoprotein A0 OS=Homo sapiens OX=9606 GN=HNRNPA0 PE=1 SV=1	ROA0_HUMAN	GHFEAFGTLTDCVVVVNPQTK	0.95
LAT3-S267+UV	S267+UV1 (F003704)	Heterogeneous nuclear ribonucleoprotein A1 OS=Homo sapiens OX=9606 GN=HNRNPA1 PE=1 SV=5	ROA1_HUMAN	DYFEQYGKIEVIEIMTDR	0.95
LAT3-S267+UV	S267+UV1 (F003704)	Heterogeneous nuclear ribonucleoprotein A1 OS=Homo sapiens OX=9606 GN=HNRNPA1 PE=1 SV=5	ROA1_HUMAN	KLFIGGLSFETTDESLR	0.95
LAT3-S267+UV	S267+UV2 (F003705)	Heterogeneous nuclear ribonucleoprotein A1 OS=Homo sapiens OX=9606 GN=HNRNPA1 PE=1 SV=5	ROA1_HUMAN	DYFEQYGKIEVIEIMTDRGSGK	0.95
LAT3-S267+UV	S267+UV2 (F003705)	Heterogeneous nuclear ribonucleoprotein A1 OS=Homo sapiens OX=9606 GN=HNRNPA1 PE=1 SV=5	ROA1_HUMAN	LFIGGLSFETTDESLR	0.95
LAT3-S267+UV	S267+UV3 (F003706)	Heterogeneous nuclear ribonucleoprotein A1 OS=Homo sapiens OX=9606 GN=HNRNPA1 PE=1 SV=5	ROA1_HUMAN	DYFEQYGKIEVIEIMTDR	0.95
LAT3-S267+UV	S267+UV3 (F003706)	Heterogeneous nuclear ribonucleoprotein A1 OS=Homo sapiens OX=9606 GN=HNRNPA1 PE=1 SV=5	ROA1_HUMAN	KLFIGGLSFETTDESLR	0.95
LAT3-S267+UV	S267+UV3 (F003706)	Heterogeneous nuclear ribonucleoprotein A1 OS=Homo sapiens OX=9606 GN=HNRNPA1 PE=1 SV=5	ROA1_HUMAN	LFIGGLSFETTDESLR	0.95
LAT3-S267+UV	S267+UV4 (F003707)	Heterogeneous nuclear ribonucleoprotein A1 OS=Homo sapiens OX=9606 GN=HNRNPA1 PE=1 SV=5	ROA1_HUMAN	DYFEQYGKIEVIEIMTDR	0.95
LAT3-S267+UV	S267+UV4 (F003707)	Heterogeneous nuclear ribonucleoprotein A1 OS=Homo sapiens OX=9606 GN=HNRNPA1 PE=1 SV=5	ROA1_HUMAN	DYFEQYGKIEVIEIMTDRGSGK	0.95
LAT3-S267+UV	S267+UV4 (F003707)	Heterogeneous nuclear ribonucleoprotein A1 OS=Homo sapiens OX=9606 GN=HNRNPA1 PE=1 SV=5	ROA1_HUMAN	LFIGGLSFETTDESLR	0.95
LAT3-S267+UV	S267+UV5 (F003708)	Heterogeneous nuclear ribonucleoprotein A1 OS=Homo sapiens OX=9606 GN=HNRNPA1 PE=1 SV=5	ROA1_HUMAN	KLFIGGLSFETTDESLR	0.95
LAT3-S267+UV	S267+UV5 (F003708)	Heterogeneous nuclear ribonucleoprotein A1 OS=Homo sapiens OX=9606 GN=HNRNPA1 PE=1 SV=5	ROA1_HUMAN	LFIGGLSFETTDESLR	0.95
LAT3-S267-UV	S267-UV1 (F003709_1)	Heterogeneous nuclear ribonucleoprotein A1 OS=Homo sapiens OX=9606 GN=HNRNPA1 PE=1 SV=5	ROA1_HUMAN	KLFIGGLSFETTDESLR	0.95
LAT3-S267-UV	S267-UV2 (F003710)	Heterogeneous nuclear ribonucleoprotein A1 OS=Homo sapiens OX=9606 GN=HNRNPA1 PE=1 SV=5	ROA1_HUMAN	DYFEQYGKIEVIEIMTDR	0.95
LAT3-S267-UV	S267-UV2 (F003710)	Heterogeneous nuclear ribonucleoprotein A1 OS=Homo sapiens OX=9606 GN=HNRNPA1 PE=1 SV=5	ROA1_HUMAN	KLFIGGLSFETTDESLR	0.95
LAT3-S267-UV	S267-UV2 (F003710)	Heterogeneous nuclear ribonucleoprotein A1 OS=Homo sapiens OX=9606 GN=HNRNPA1 PE=1 SV=5	ROA1_HUMAN	LFIGGLSFETTDESLR	0.95
LAT3-S267-UV	S267-UV3 (F003711)	Heterogeneous nuclear ribonucleoprotein A1 OS=Homo sapiens OX=9606 GN=HNRNPA1 PE=1 SV=5	ROA1_HUMAN	KLFIGGLSFETTDESLR	0.95
LAT3-S267-UV	S267-UV3 (F003711)	Heterogeneous nuclear ribonucleoprotein A1 OS=Homo sapiens OX=9606 GN=HNRNPA1 PE=1 SV=5	ROA1_HUMAN	LFIGGLSFETTDESLR	0.95
LAT3-S267-UV	S267-UV4 (F003712)	Heterogeneous nuclear ribonucleoprotein A1 OS=Homo sapiens OX=9606 GN=HNRNPA1 PE=1 SV=5	ROA1_HUMAN	DYFEQYGKIEVIEIMTDR	0.95
LAT3-S267-UV	S267-UV4 (F003712)	Heterogeneous nuclear ribonucleoprotein A1 OS=Homo sapiens OX=9606 GN=HNRNPA1 PE=1 SV=5	ROA1_HUMAN	GFGFVTYATVEEVDAAMNARPHKVDGR	0.95
LAT3-S267-UV	S267-UV4 (F003712)	Heterogeneous nuclear ribonucleoprotein A1 OS=Homo sapiens OX=9606 GN=HNRNPA1 PE=1 SV=5	ROA1_HUMAN	LFIGGLSFETTDESLR	0.95
LAT3-S267-UV	S267-UV5 (F003713)	Heterogeneous nuclear ribonucleoprotein A1 OS=Homo sapiens OX=9606 GN=HNRNPA1 PE=1 SV=5	ROA1_HUMAN	DYFEQYGKIEVIEIMTDR	0.95
LAT3-S267-UV	S267-UV5 (F003713)	Heterogeneous nuclear ribonucleoprotein A1 OS=Homo sapiens OX=9606 GN=HNRNPA1 PE=1 SV=5	ROA1_HUMAN	GFGFVTYATVEEVDAAMNARPHKVDGR	0.95
LAT3-S267-UV	S267-UV5 (F003713)	Heterogeneous nuclear ribonucleoprotein A1 OS=Homo sapiens OX=9606 GN=HNRNPA1 PE=1 SV=5	ROA1_HUMAN	KLFIGGLSFETTDESLR	0.95
LAT3-S267+UV	S267+UV1 (F003704)	Heterogeneous nuclear ribonucleoproteins A2/B1 OS=Homo sapiens OX=9606 GN=HNRNPA2B1 PE=1 SV=2	ROA2_HUMAN	GFGFVTFSSMAEVDAAMAARPHSIDGR	0.95
LAT3-S267+UV	S267+UV1 (F003704)	Heterogeneous nuclear ribonucleoproteins A2/B1 OS=Homo sapiens OX=9606 GN=HNRNPA2B1 PE=1 SV=2	ROA2_HUMAN	KLFIGGLSFETTEESLR	0.95
LAT3-S267+UV	S267+UV1 (F003704)	Heterogeneous nuclear ribonucleoproteins A2/B1 OS=Homo sapiens OX=9606 GN=HNRNPA2B1 PE=1 SV=2	ROA2_HUMAN	LFIGGLSFETTEESLR	0.95
LAT3-S267+UV	S267+UV1 (F003704)	Heterogeneous nuclear ribonucleoproteins A2/B1 OS=Homo sapiens OX=9606 GN=HNRNPA2B1 PE=1 SV=2	ROA2_HUMAN	LFIGGLSFETTEESLRNYYEQWGK	0.95
LAT3-S267+UV	S267+UV1 (F003704)	Heterogeneous nuclear ribonucleoproteins A2/B1 OS=Homo sapiens OX=9606 GN=HNRNPA2B1 PE=1 SV=2	ROA2_HUMAN	SRGFGFVTFSSMAEVDAAMAARPHSIDGR	0.95
LAT3-S267+UV	S267+UV2 (F003705)	Heterogeneous nuclear ribonucleoproteins A2/B1 OS=Homo sapiens OX=9606 GN=HNRNPA2B1 PE=1 SV=2	ROA2_HUMAN	DYFEEYGKIDTIEIITDR	0.95
LAT3-S267+UV	S267+UV2 (F003705)	Heterogeneous nuclear ribonucleoproteins A2/B1 OS=Homo sapiens OX=9606 GN=HNRNPA2B1 PE=1 SV=2	ROA2_HUMAN	GFGFVTFSSMAEVDAAMAARPHSIDGR	0.95
LAT3-S267+UV	S267+UV2 (F003705)	Heterogeneous nuclear ribonucleoproteins A2/B1 OS=Homo sapiens OX=9606 GN=HNRNPA2B1 PE=1 SV=2	ROA2_HUMAN	KLFIGGLSFETTEESLR	0.95
LAT3-S267+UV	S267+UV2 (F003705)	Heterogeneous nuclear ribonucleoproteins A2/B1 OS=Homo sapiens OX=9606 GN=HNRNPA2B1 PE=1 SV=2	ROA2_HUMAN	LFIGGLSFETTEESLR	0.95
LAT3-S267+UV	S267+UV2 (F003705)	Heterogeneous nuclear ribonucleoproteins A2/B1 OS=Homo sapiens OX=9606 GN=HNRNPA2B1 PE=1 SV=2	ROA2_HUMAN	LFIGGLSFETTEESLRNYYEQWGK	0.95
LAT3-S267+UV	S267+UV2 (F003705)	Heterogeneous nuclear ribonucleoproteins A2/B1 OS=Homo sapiens OX=9606 GN=HNRNPA2B1 PE=1 SV=2	ROA2_HUMAN	SRGFGFVTFSSMAEVDAAMAARPHSIDGR	0.95
LAT3-S267+UV	S267+UV3 (F003706)	Heterogeneous nuclear ribonucleoproteins A2/B1 OS=Homo sapiens OX=9606 GN=HNRNPA2B1 PE=1 SV=2	ROA2_HUMAN	DYFEEYGKIDTIEIITDR	0.95
LAT3-S267+UV	S267+UV3 (F003706)	Heterogeneous nuclear ribonucleoproteins A2/B1 OS=Homo sapiens OX=9606 GN=HNRNPA2B1 PE=1 SV=2	ROA2_HUMAN	DYFEEYGKIDTIEIITDRQSGK	0.95
LAT3-S267+UV	S267+UV3 (F003706)	Heterogeneous nuclear ribonucleoproteins A2/B1 OS=Homo sapiens OX=9606 GN=HNRNPA2B1 PE=1 SV=2	ROA2_HUMAN	GFGFVTFSSMAEVDAAMAARPHSIDGR	0.95
LAT3-S267+UV	S267+UV3 (F003706)	Heterogeneous nuclear ribonucleoproteins A2/B1 OS=Homo sapiens OX=9606 GN=HNRNPA2B1 PE=1 SV=2	ROA2_HUMAN	KLFIGGLSFETTEESLR	0.95
LAT3-S267+UV	S267+UV3 (F003706)	Heterogeneous nuclear ribonucleoproteins A2/B1 OS=Homo sapiens OX=9606 GN=HNRNPA2B1 PE=1 SV=2	ROA2_HUMAN	LFIGGLSFETTEESLR	0.95
LAT3-S267+UV	S267+UV3 (F003706)	Heterogeneous nuclear ribonucleoproteins A2/B1 OS=Homo sapiens OX=9606 GN=HNRNPA2B1 PE=1 SV=2	ROA2_HUMAN	LFIGGLSFETTEESLRNYYEQWGK	0.95
LAT3-S267+UV	S267+UV3 (F003706)	Heterogeneous nuclear ribonucleoproteins A2/B1 OS=Homo sapiens OX=9606 GN=HNRNPA2B1 PE=1 SV=2	ROA2_HUMAN	SRGFGFVTFSSMAEVDAAMAARPHSIDGR	0.95
LAT3-S267+UV	S267+UV4 (F003707)	Heterogeneous nuclear ribonucleoproteins A2/B1 OS=Homo sapiens OX=9606 GN=HNRNPA2B1 PE=1 SV=2	ROA2_HUMAN	DYFEEYGKIDTIEIITDR	0.95
LAT3-S267+UV	S267+UV4 (F003707)	Heterogeneous nuclear ribonucleoproteins A2/B1 OS=Homo sapiens OX=9606 GN=HNRNPA2B1 PE=1 SV=2	ROA2_HUMAN	GFGFVTFSSMAEVDAAMAARPHSIDGR	0.95
LAT3-S267+UV	S267+UV4 (F003707)	Heterogeneous nuclear ribonucleoproteins A2/B1 OS=Homo sapiens OX=9606 GN=HNRNPA2B1 PE=1 SV=2	ROA2_HUMAN	GGGGNFGPGPGSNFR	0.95
LAT3-S267+UV	S267+UV4 (F003707)	Heterogeneous nuclear ribonucleoproteins A2/B1 OS=Homo sapiens OX=9606 GN=HNRNPA2B1 PE=1 SV=2	ROA2_HUMAN	KLFIGGLSFETTEESLR	0.95
LAT3-S267+UV	S267+UV4 (F003707)	Heterogeneous nuclear ribonucleoproteins A2/B1 OS=Homo sapiens OX=9606 GN=HNRNPA2B1 PE=1 SV=2	ROA2_HUMAN	LFIGGLSFETTEESLR	0.95
LAT3-S267+UV	S267+UV4 (F003707)	Heterogeneous nuclear ribonucleoproteins A2/B1 OS=Homo sapiens OX=9606 GN=HNRNPA2B1 PE=1 SV=2	ROA2_HUMAN	LFIGGLSFETTEESLRNYYEQWGK	0.95
LAT3-S267+UV	S267+UV4 (F003707)	Heterogeneous nuclear ribonucleoproteins A2/B1 OS=Homo sapiens OX=9606 GN=HNRNPA2B1 PE=1 SV=2	ROA2_HUMAN	SRGFGFVTFSSMAEVDAAMAARPHSIDGR	0.95
LAT3-S267+UV	S267+UV5 (F003708)	Heterogeneous nuclear ribonucleoproteins A2/B1 OS=Homo sapiens OX=9606 GN=HNRNPA2B1 PE=1 SV=2	ROA2_HUMAN	DYFEEYGKIDTIEIITDR	0.95
LAT3-S267+UV	S267+UV5 (F003708)	Heterogeneous nuclear ribonucleoproteins A2/B1 OS=Homo sapiens OX=9606 GN=HNRNPA2B1 PE=1 SV=2	ROA2_HUMAN	GFGFVTFSSMAEVDAAMAARPHSIDGR	0.95
LAT3-S267+UV	S267+UV5 (F003708)	Heterogeneous nuclear ribonucleoproteins A2/B1 OS=Homo sapiens OX=9606 GN=HNRNPA2B1 PE=1 SV=2	ROA2_HUMAN	KLFIGGLSFETTEESLR	0.95
LAT3-S267+UV	S267+UV5 (F003708)	Heterogeneous nuclear ribonucleoproteins A2/B1 OS=Homo sapiens OX=9606 GN=HNRNPA2B1 PE=1 SV=2	ROA2_HUMAN	LFIGGLSFETTEESLR	0.95
LAT3-S267+UV	S267+UV5 (F003708)	Heterogeneous nuclear ribonucleoproteins A2/B1 OS=Homo sapiens OX=9606 GN=HNRNPA2B1 PE=1 SV=2	ROA2_HUMAN	SRGFGFVTFSSMAEVDAAMAARPHSIDGR	0.95
LAT3-S267-UV	S267-UV1 (F003709_1)	Heterogeneous nuclear ribonucleoproteins A2/B1 OS=Homo sapiens OX=9606 GN=HNRNPA2B1 PE=1 SV=2	ROA2_HUMAN	DYFEEYGKIDTIEIITDR	0.95
LAT3-S267-UV	S267-UV1 (F003709_1)	Heterogeneous nuclear ribonucleoproteins A2/B1 OS=Homo sapiens OX=9606 GN=HNRNPA2B1 PE=1 SV=2	ROA2_HUMAN	GFGFVTFSSMAEVDAAMAARPHSIDGR	0.95
LAT3-S267-UV	S267-UV1 (F003709_1)	Heterogeneous nuclear ribonucleoproteins A2/B1 OS=Homo sapiens OX=9606 GN=HNRNPA2B1 PE=1 SV=2	ROA2_HUMAN	KLFIGGLSFETTEESLR	0.95
LAT3-S267-UV	S267-UV1 (F003709_1)	Heterogeneous nuclear ribonucleoproteins A2/B1 OS=Homo sapiens OX=9606 GN=HNRNPA2B1 PE=1 SV=2	ROA2_HUMAN	KLFIGGLSFETTEESLRNYYEQWGK	0.95
LAT3-S267-UV	S267-UV1 (F003709_1)	Heterogeneous nuclear ribonucleoproteins A2/B1 OS=Homo sapiens OX=9606 GN=HNRNPA2B1 PE=1 SV=2	ROA2_HUMAN	LFIGGLSFETTEESLR	0.95
LAT3-S267-UV	S267-UV1 (F003709_1)	Heterogeneous nuclear ribonucleoproteins A2/B1 OS=Homo sapiens OX=9606 GN=HNRNPA2B1 PE=1 SV=2	ROA2_HUMAN	SRGFGFVTFSSMAEVDAAMAARPHSIDGR	0.95
LAT3-S267-UV	S267-UV2 (F003710)	Heterogeneous nuclear ribonucleoproteins A2/B1 OS=Homo sapiens OX=9606 GN=HNRNPA2B1 PE=1 SV=2	ROA2_HUMAN	DYFEEYGKIDTIEIITDR	0.95
LAT3-S267-UV	S267-UV2 (F003710)	Heterogeneous nuclear ribonucleoproteins A2/B1 OS=Homo sapiens OX=9606 GN=HNRNPA2B1 PE=1 SV=2	ROA2_HUMAN	GFGFVTFSSMAEVDAAMAARPHSIDGR	0.95
LAT3-S267-UV	S267-UV2 (F003710)	Heterogeneous nuclear ribonucleoproteins A2/B1 OS=Homo sapiens OX=9606 GN=HNRNPA2B1 PE=1 SV=2	ROA2_HUMAN	KLFIGGLSFETTEESLR	0.95
LAT3-S267-UV	S267-UV2 (F003710)	Heterogeneous nuclear ribonucleoproteins A2/B1 OS=Homo sapiens OX=9606 GN=HNRNPA2B1 PE=1 SV=2	ROA2_HUMAN	LFIGGLSFETTEESLR	0.95
LAT3-S267-UV	S267-UV3 (F003711)	Heterogeneous nuclear ribonucleoproteins A2/B1 OS=Homo sapiens OX=9606 GN=HNRNPA2B1 PE=1 SV=2	ROA2_HUMAN	DYFEEYGKIDTIEIITDR	0.95
LAT3-S267-UV	S267-UV3 (F003711)	Heterogeneous nuclear ribonucleoproteins A2/B1 OS=Homo sapiens OX=9606 GN=HNRNPA2B1 PE=1 SV=2	ROA2_HUMAN	GFGFVTFSSMAEVDAAMAARPHSIDGR	0.95
LAT3-S267-UV	S267-UV3 (F003711)	Heterogeneous nuclear ribonucleoproteins A2/B1 OS=Homo sapiens OX=9606 GN=HNRNPA2B1 PE=1 SV=2	ROA2_HUMAN	KLFIGGLSFETTEESLR	0.95
LAT3-S267-UV	S267-UV3 (F003711)	Heterogeneous nuclear ribonucleoproteins A2/B1 OS=Homo sapiens OX=9606 GN=HNRNPA2B1 PE=1 SV=2	ROA2_HUMAN	LFIGGLSFETTEESLR	0.95
LAT3-S267-UV	S267-UV3 (F003711)	Heterogeneous nuclear ribonucleoproteins A2/B1 OS=Homo sapiens OX=9606 GN=HNRNPA2B1 PE=1 SV=2	ROA2_HUMAN	LFIGGLSFETTEESLRNYYEQWGK	0.95
LAT3-S267-UV	S267-UV3 (F003711)	Heterogeneous nuclear ribonucleoproteins A2/B1 OS=Homo sapiens OX=9606 GN=HNRNPA2B1 PE=1 SV=2	ROA2_HUMAN	SRGFGFVTFSSMAEVDAAMAARPHSIDGR	0.95
LAT3-S267-UV	S267-UV4 (F003712)	Heterogeneous nuclear ribonucleoproteins A2/B1 OS=Homo sapiens OX=9606 GN=HNRNPA2B1 PE=1 SV=2	ROA2_HUMAN	DYFEEYGKIDTIEIITDR	0.95
LAT3-S267-UV	S267-UV4 (F003712)	Heterogeneous nuclear ribonucleoproteins A2/B1 OS=Homo sapiens OX=9606 GN=HNRNPA2B1 PE=1 SV=2	ROA2_HUMAN	DYFEEYGKIDTIEIITDRQSGK	0.95
LAT3-S267-UV	S267-UV4 (F003712)	Heterogeneous nuclear ribonucleoproteins A2/B1 OS=Homo sapiens OX=9606 GN=HNRNPA2B1 PE=1 SV=2	ROA2_HUMAN	GFGFVTFSSMAEVDAAMAARPHSIDGR	0.95
LAT3-S267-UV	S267-UV4 (F003712)	Heterogeneous nuclear ribonucleoproteins A2/B1 OS=Homo sapiens OX=9606 GN=HNRNPA2B1 PE=1 SV=2	ROA2_HUMAN	KLFIGGLSFETTEESLR	0.95
LAT3-S267-UV	S267-UV4 (F003712)	Heterogeneous nuclear ribonucleoproteins A2/B1 OS=Homo sapiens OX=9606 GN=HNRNPA2B1 PE=1 SV=2	ROA2_HUMAN	LFIGGLSFETTEESLR	0.95
LAT3-S267-UV	S267-UV4 (F003712)	Heterogeneous nuclear ribonucleoproteins A2/B1 OS=Homo sapiens OX=9606 GN=HNRNPA2B1 PE=1 SV=2	ROA2_HUMAN	SRGFGFVTFSSMAEVDAAMAARPHSIDGR	0.95
LAT3-S267-UV	S267-UV5 (F003713)	Heterogeneous nuclear ribonucleoproteins A2/B1 OS=Homo sapiens OX=9606 GN=HNRNPA2B1 PE=1 SV=2	ROA2_HUMAN	DYFEEYGKIDTIEIITDR	0.95
LAT3-S267-UV	S267-UV5 (F003713)	Heterogeneous nuclear ribonucleoproteins A2/B1 OS=Homo sapiens OX=9606 GN=HNRNPA2B1 PE=1 SV=2	ROA2_HUMAN	GFGFVTFSSMAEVDAAMAARPHSIDGR	0.95
LAT3-S267-UV	S267-UV5 (F003713)	Heterogeneous nuclear ribonucleoproteins A2/B1 OS=Homo sapiens OX=9606 GN=HNRNPA2B1 PE=1 SV=2	ROA2_HUMAN	KLFIGGLSFETTEESLR	0.95
LAT3-S267-UV	S267-UV5 (F003713)	Heterogeneous nuclear ribonucleoproteins A2/B1 OS=Homo sapiens OX=9606 GN=HNRNPA2B1 PE=1 SV=2	ROA2_HUMAN	LFIGGLSFETTEESLR	0.95
LAT3-S267-UV	S267-UV5 (F003713)	Heterogeneous nuclear ribonucleoproteins A2/B1 OS=Homo sapiens OX=9606 GN=HNRNPA2B1 PE=1 SV=2	ROA2_HUMAN	LFIGGLSFETTEESLRNYYEQWGK	0.95
LAT3-S267+UV	S267+UV1 (F003704)	40S ribosomal protein S3a OS=Homo sapiens OX=9606 GN=RPS3A PE=1 SV=2	RS3A_HUMAN	VFEVSLADLQNDEVAFR	0.95
LAT3-S267+UV	S267+UV2 (F003705)	40S ribosomal protein S3a OS=Homo sapiens OX=9606 GN=RPS3A PE=1 SV=2	RS3A_HUMAN	GRVFEVSLADLQNDEVAFR	0.95
LAT3-S267+UV	S267+UV2 (F003705)	40S ribosomal protein S3a OS=Homo sapiens OX=9606 GN=RPS3A PE=1 SV=2	RS3A_HUMAN	VFEVSLADLQNDEVAFR	0.95
LAT3-S267+UV	S267+UV3 (F003706)	40S ribosomal protein S3a OS=Homo sapiens OX=9606 GN=RPS3A PE=1 SV=2	RS3A_HUMAN	GRVFEVSLADLQNDEVAFR	0.95
LAT3-S267+UV	S267+UV3 (F003706)	40S ribosomal protein S3a OS=Homo sapiens OX=9606 GN=RPS3A PE=1 SV=2	RS3A_HUMAN	VFEVSLADLQNDEVAFR	0.95
LAT3-S267+UV	S267+UV4 (F003707)	40S ribosomal protein S3a OS=Homo sapiens OX=9606 GN=RPS3A PE=1 SV=2	RS3A_HUMAN	VFEVSLADLQNDEVAFR	0.95
LAT3-S267+UV	S267+UV5 (F003708)	40S ribosomal protein S3a OS=Homo sapiens OX=9606 GN=RPS3A PE=1 SV=2	RS3A_HUMAN	GRVFEVSLADLQNDEVAFR	0.95
LAT3-S267+UV	S267+UV5 (F003708)	40S ribosomal protein S3a OS=Homo sapiens OX=9606 GN=RPS3A PE=1 SV=2	RS3A_HUMAN	VFEVSLADLQNDEVAFR	0.95
LAT3-S267-UV	S267-UV1 (F003709_1)	40S ribosomal protein S3a OS=Homo sapiens OX=9606 GN=RPS3A PE=1 SV=2	RS3A_HUMAN	GRVFEVSLADLQNDEVAFR	0.95
LAT3-S267-UV	S267-UV2 (F003710)	40S ribosomal protein S3a OS=Homo sapiens OX=9606 GN=RPS3A PE=1 SV=2	RS3A_HUMAN	VFEVSLADLQNDEVAFR	0.95
LAT3-S267-UV	S267-UV3 (F003711)	40S ribosomal protein S3a OS=Homo sapiens OX=9606 GN=RPS3A PE=1 SV=2	RS3A_HUMAN	VFEVSLADLQNDEVAFR	0.95
LAT3-S267-UV	S267-UV4 (F003712)	40S ribosomal protein S3a OS=Homo sapiens OX=9606 GN=RPS3A PE=1 SV=2	RS3A_HUMAN	VFEVSLADLQNDEVAFR	0.95
LAT3-S267-UV	S267-UV5 (F003713)	40S ribosomal protein S3a OS=Homo sapiens OX=9606 GN=RPS3A PE=1 SV=2	RS3A_HUMAN	VFEVSLADLQNDEVAFR	0.95
LAT3-S267+UV	S267+UV2 (F003705)	40S ribosomal protein S5 OS=Homo sapiens OX=9606 GN=RPS5 PE=1 SV=4	RS5_HUMAN	LFGKWSTDDVQINDISLQDYIAVK	0.95
LAT3-S267+UV	S267+UV2 (F003705)	40S ribosomal protein S5 OS=Homo sapiens OX=9606 GN=RPS5 PE=1 SV=4	RS5_HUMAN	LFGKWSTDDVQINDISLQDYIAVKEK	0.95
LAT3-S267+UV	S267+UV4 (F003707)	Protein transport protein Sec16A OS=Homo sapiens OX=9606 GN=SEC16A PE=1 SV=3	SC16A_HUMAN	SILTQPHLYSPVLISQLVQMASQLR	0.95
LAT3-S267-UV	S267-UV1 (F003709_1)	Protein transport protein Sec16A OS=Homo sapiens OX=9606 GN=SEC16A PE=1 SV=3	SC16A_HUMAN	SILTQPHLYSPVLISQLVQMASQLR	0.95
LAT3-S267-UV	S267-UV3 (F003711)	Protein transport protein Sec16A OS=Homo sapiens OX=9606 GN=SEC16A PE=1 SV=3	SC16A_HUMAN	SEPALAPADFVAPLAPLPIPSNLFVPTPDAEEPQLPDGTGREGPAAAR	0.95
LAT3-S267-UV	S267-UV3 (F003711)	Protein transport protein Sec16A OS=Homo sapiens OX=9606 GN=SEC16A PE=1 SV=3	SC16A_HUMAN	SILTQPHLYSPVLISQLVQMASQLR	0.95
LAT3-S267-UV	S267-UV5 (F003713)	Protein transport protein Sec16A OS=Homo sapiens OX=9606 GN=SEC16A PE=1 SV=3	SC16A_HUMAN	SILTQPHLYSPVLISQLVQMASQLR	0.95
LAT3-S267+UV	S267+UV1 (F003704)	Splicing factor 3B subunit 1 OS=Homo sapiens OX=9606 GN=SF3B1 PE=1 SV=3	SF3B1_HUMAN	AFAVVASALGIPSLLPFLK	0.95
LAT3-S267+UV	S267+UV1 (F003704)	Splicing factor 3B subunit 1 OS=Homo sapiens OX=9606 GN=SF3B1 PE=1 SV=3	SF3B1_HUMAN	EFGAGPLFNQILPLLMSPTLEDQER	0.95
LAT3-S267+UV	S267+UV1 (F003704)	Splicing factor 3B subunit 1 OS=Homo sapiens OX=9606 GN=SF3B1 PE=1 SV=3	SF3B1_HUMAN	IYNSIYIGSQDALIAHYPR	0.95
LAT3-S267+UV	S267+UV1 (F003704)	Splicing factor 3B subunit 1 OS=Homo sapiens OX=9606 GN=SF3B1 PE=1 SV=3	SF3B1_HUMAN	TISALAIAALAEAATPYGIESFDSVLKPLWK	0.95
LAT3-S267+UV	S267+UV2 (F003705)	Splicing factor 3B subunit 1 OS=Homo sapiens OX=9606 GN=SF3B1 PE=1 SV=3	SF3B1_HUMAN	AFAVVASALGIPSLLPFLK	0.95
LAT3-S267+UV	S267+UV2 (F003705)	Splicing factor 3B subunit 1 OS=Homo sapiens OX=9606 GN=SF3B1 PE=1 SV=3	SF3B1_HUMAN	EFGAGPLFNQILPLLMSPTLEDQER	0.95
LAT3-S267+UV	S267+UV2 (F003705)	Splicing factor 3B subunit 1 OS=Homo sapiens OX=9606 GN=SF3B1 PE=1 SV=3	SF3B1_HUMAN	TISALAIAALAEAATPYGIESFDSVLKPLWK	0.95
LAT3-S267+UV	S267+UV3 (F003706)	Splicing factor 3B subunit 1 OS=Homo sapiens OX=9606 GN=SF3B1 PE=1 SV=3	SF3B1_HUMAN	AFAVVASALGIPSLLPFLK	0.95
LAT3-S267+UV	S267+UV3 (F003706)	Splicing factor 3B subunit 1 OS=Homo sapiens OX=9606 GN=SF3B1 PE=1 SV=3	SF3B1_HUMAN	IYNSIYIGSQDALIAHYPR	0.95
LAT3-S267+UV	S267+UV3 (F003706)	Splicing factor 3B subunit 1 OS=Homo sapiens OX=9606 GN=SF3B1 PE=1 SV=3	SF3B1_HUMAN	QLVDTTVELANKVGAAEIISR	0.95
LAT3-S267+UV	S267+UV3 (F003706)	Splicing factor 3B subunit 1 OS=Homo sapiens OX=9606 GN=SF3B1 PE=1 SV=3	SF3B1_HUMAN	TISALAIAALAEAATPYGIESFDSVLKPLWK	0.95
LAT3-S267+UV	S267+UV4 (F003707)	Splicing factor 3B subunit 1 OS=Homo sapiens OX=9606 GN=SF3B1 PE=1 SV=3	SF3B1_HUMAN	AFAVVASALGIPSLLPFLK	0.95
LAT3-S267+UV	S267+UV4 (F003707)	Splicing factor 3B subunit 1 OS=Homo sapiens OX=9606 GN=SF3B1 PE=1 SV=3	SF3B1_HUMAN	EFGAGPLFNQILPLLMSPTLEDQER	0.95
LAT3-S267+UV	S267+UV4 (F003707)	Splicing factor 3B subunit 1 OS=Homo sapiens OX=9606 GN=SF3B1 PE=1 SV=3	SF3B1_HUMAN	TISALAIAALAEAATPYGIESFDSVLKPLWK	0.95
LAT3-S267+UV	S267+UV5 (F003708)	Splicing factor 3B subunit 1 OS=Homo sapiens OX=9606 GN=SF3B1 PE=1 SV=3	SF3B1_HUMAN	AFAVVASALGIPSLLPFLK	0.95
LAT3-S267+UV	S267+UV5 (F003708)	Splicing factor 3B subunit 1 OS=Homo sapiens OX=9606 GN=SF3B1 PE=1 SV=3	SF3B1_HUMAN	EFGAGPLFNQILPLLMSPTLEDQER	0.95
LAT3-S267+UV	S267+UV5 (F003708)	Splicing factor 3B subunit 1 OS=Homo sapiens OX=9606 GN=SF3B1 PE=1 SV=3	SF3B1_HUMAN	IYNSIYIGSQDALIAHYPR	0.95
LAT3-S267+UV	S267+UV5 (F003708)	Splicing factor 3B subunit 1 OS=Homo sapiens OX=9606 GN=SF3B1 PE=1 SV=3	SF3B1_HUMAN	TISALAIAALAEAATPYGIESFDSVLKPLWK	0.95
LAT3-S267-UV	S267-UV1 (F003709_1)	Splicing factor 3B subunit 1 OS=Homo sapiens OX=9606 GN=SF3B1 PE=1 SV=3	SF3B1_HUMAN	AFAVVASALGIPSLLPFLK	0.95
LAT3-S267-UV	S267-UV1 (F003709_1)	Splicing factor 3B subunit 1 OS=Homo sapiens OX=9606 GN=SF3B1 PE=1 SV=3	SF3B1_HUMAN	EFGAGPLFNQILPLLMSPTLEDQER	0.95
LAT3-S267-UV	S267-UV1 (F003709_1)	Splicing factor 3B subunit 1 OS=Homo sapiens OX=9606 GN=SF3B1 PE=1 SV=3	SF3B1_HUMAN	TISALAIAALAEAATPYGIESFDSVLKPLWK	0.95
LAT3-S267-UV	S267-UV2 (F003710)	Splicing factor 3B subunit 1 OS=Homo sapiens OX=9606 GN=SF3B1 PE=1 SV=3	SF3B1_HUMAN	AFAVVASALGIPSLLPFLK	0.95
LAT3-S267-UV	S267-UV2 (F003710)	Splicing factor 3B subunit 1 OS=Homo sapiens OX=9606 GN=SF3B1 PE=1 SV=3	SF3B1_HUMAN	EFGAGPLFNQILPLLMSPTLEDQER	0.95
LAT3-S267-UV	S267-UV2 (F003710)	Splicing factor 3B subunit 1 OS=Homo sapiens OX=9606 GN=SF3B1 PE=1 SV=3	SF3B1_HUMAN	IYNSIYIGSQDALIAHYPR	0.95
LAT3-S267-UV	S267-UV2 (F003710)	Splicing factor 3B subunit 1 OS=Homo sapiens OX=9606 GN=SF3B1 PE=1 SV=3	SF3B1_HUMAN	TISALAIAALAEAATPYGIESFDSVLKPLWK	0.95
LAT3-S267-UV	S267-UV3 (F003711)	Splicing factor 3B subunit 1 OS=Homo sapiens OX=9606 GN=SF3B1 PE=1 SV=3	SF3B1_HUMAN	AFAVVASALGIPSLLPFLK	0.95
LAT3-S267-UV	S267-UV3 (F003711)	Splicing factor 3B subunit 1 OS=Homo sapiens OX=9606 GN=SF3B1 PE=1 SV=3	SF3B1_HUMAN	EFGAGPLFNQILPLLMSPTLEDQER	0.95
LAT3-S267-UV	S267-UV3 (F003711)	Splicing factor 3B subunit 1 OS=Homo sapiens OX=9606 GN=SF3B1 PE=1 SV=3	SF3B1_HUMAN	IYNSIYIGSQDALIAHYPR	0.95
LAT3-S267-UV	S267-UV3 (F003711)	Splicing factor 3B subunit 1 OS=Homo sapiens OX=9606 GN=SF3B1 PE=1 SV=3	SF3B1_HUMAN	TISALAIAALAEAATPYGIESFDSVLKPLWK	0.95
LAT3-S267-UV	S267-UV4 (F003712)	Splicing factor 3B subunit 1 OS=Homo sapiens OX=9606 GN=SF3B1 PE=1 SV=3	SF3B1_HUMAN	AFAVVASALGIPSLLPFLK	0.95
LAT3-S267-UV	S267-UV4 (F003712)	Splicing factor 3B subunit 1 OS=Homo sapiens OX=9606 GN=SF3B1 PE=1 SV=3	SF3B1_HUMAN	EFGAGPLFNQILPLLMSPTLEDQER	0.95
LAT3-S267-UV	S267-UV4 (F003712)	Splicing factor 3B subunit 1 OS=Homo sapiens OX=9606 GN=SF3B1 PE=1 SV=3	SF3B1_HUMAN	IYNSIYIGSQDALIAHYPR	0.95
LAT3-S267-UV	S267-UV4 (F003712)	Splicing factor 3B subunit 1 OS=Homo sapiens OX=9606 GN=SF3B1 PE=1 SV=3	SF3B1_HUMAN	TISALAIAALAEAATPYGIESFDSVLKPLWK	0.95
LAT3-S267-UV	S267-UV5 (F003713)	Splicing factor 3B subunit 1 OS=Homo sapiens OX=9606 GN=SF3B1 PE=1 SV=3	SF3B1_HUMAN	AFAVVASALGIPSLLPFLK	0.95
LAT3-S267-UV	S267-UV5 (F003713)	Splicing factor 3B subunit 1 OS=Homo sapiens OX=9606 GN=SF3B1 PE=1 SV=3	SF3B1_HUMAN	EFGAGPLFNQILPLLMSPTLEDQER	0.95
LAT3-S267-UV	S267-UV5 (F003713)	Splicing factor 3B subunit 1 OS=Homo sapiens OX=9606 GN=SF3B1 PE=1 SV=3	SF3B1_HUMAN	IYNSIYIGSQDALIAHYPR	0.95
LAT3-S267-UV	S267-UV5 (F003713)	Splicing factor 3B subunit 1 OS=Homo sapiens OX=9606 GN=SF3B1 PE=1 SV=3	SF3B1_HUMAN	QLVDTTVELANKVGAAEIISR	0.95
LAT3-S267-UV	S267-UV5 (F003713)	Splicing factor 3B subunit 1 OS=Homo sapiens OX=9606 GN=SF3B1 PE=1 SV=3	SF3B1_HUMAN	TISALAIAALAEAATPYGIESFDSVLKPLWK	0.95
LAT3-S267+UV	S267+UV1 (F003704)	Tubulin alpha-1A chain OS=Homo sapiens OX=9606 GN=TUBA1A PE=1 SV=1	TBA1A_HUMAN,TBA1B_HUMAN	AVCMLSNTTAIAEAWAR	0.95
LAT3-S267+UV	S267+UV1 (F003704)	Tubulin alpha-1A chain OS=Homo sapiens OX=9606 GN=TUBA1A PE=1 SV=1	TBA1A_HUMAN,TBA1B_HUMAN	AYHEQLSVAEITNACFEPANQMVK	0.95
LAT3-S267+UV	S267+UV2 (F003705)	Tubulin alpha-1A chain OS=Homo sapiens OX=9606 GN=TUBA1A PE=1 SV=1	TBA1A_HUMAN,TBA1B_HUMAN	AVCMLSNTTAIAEAWAR	0.95
LAT3-S267+UV	S267+UV3 (F003706)	Tubulin alpha-1A chain OS=Homo sapiens OX=9606 GN=TUBA1A PE=1 SV=1	TBA1A_HUMAN,TBA1B_HUMAN	AVCMLSNTTAIAEAWAR	0.95
LAT3-S267+UV	S267+UV3 (F003706)	Tubulin alpha-1A chain OS=Homo sapiens OX=9606 GN=TUBA1A PE=1 SV=1	TBA1A_HUMAN,TBA1B_HUMAN	AYHEQLSVAEITNACFEPANQMVK	0.95
LAT3-S267+UV	S267+UV3 (F003706)	Tubulin alpha-1A chain OS=Homo sapiens OX=9606 GN=TUBA1A PE=1 SV=1	TBA1A_HUMAN,TBA1B_HUMAN	KLADQCTGLQGFLVFHSFGGGTGSGFTSLLMER	0.95
LAT3-S267+UV	S267+UV4 (F003707)	Tubulin alpha-1A chain OS=Homo sapiens OX=9606 GN=TUBA1A PE=1 SV=1	TBA1A_HUMAN,TBA1B_HUMAN	AYHEQLSVAEITNACFEPANQMVK	0.95
LAT3-S267+UV	S267+UV5 (F003708)	Tubulin alpha-1A chain OS=Homo sapiens OX=9606 GN=TUBA1A PE=1 SV=1	TBA1A_HUMAN,TBA1B_HUMAN	AVCMLSNTTAIAEAWAR	0.95
LAT3-S267-UV	S267-UV1 (F003709_1)	Tubulin alpha-1A chain OS=Homo sapiens OX=9606 GN=TUBA1A PE=1 SV=1	TBA1A_HUMAN,TBA1B_HUMAN	AVCMLSNTTAIAEAWAR	0.95
LAT3-S267-UV	S267-UV1 (F003709_1)	Tubulin alpha-1A chain OS=Homo sapiens OX=9606 GN=TUBA1A PE=1 SV=1	TBA1A_HUMAN,TBA1B_HUMAN	AYHEQLSVAEITNACFEPANQMVK	0.95
LAT3-S267-UV	S267-UV2 (F003710)	Tubulin alpha-1A chain OS=Homo sapiens OX=9606 GN=TUBA1A PE=1 SV=1	TBA1A_HUMAN,TBA1B_HUMAN	AVCMLSNTTAIAEAWAR	0.95
LAT3-S267-UV	S267-UV2 (F003710)	Tubulin alpha-1A chain OS=Homo sapiens OX=9606 GN=TUBA1A PE=1 SV=1	TBA1A_HUMAN,TBA1B_HUMAN	AYHEQLSVAEITNACFEPANQMVK	0.95
LAT3-S267-UV	S267-UV3 (F003711)	Tubulin alpha-1A chain OS=Homo sapiens OX=9606 GN=TUBA1A PE=1 SV=1	TBA1A_HUMAN,TBA1B_HUMAN	AVCMLSNTTAIAEAWAR	0.95
LAT3-S267-UV	S267-UV3 (F003711)	Tubulin alpha-1A chain OS=Homo sapiens OX=9606 GN=TUBA1A PE=1 SV=1	TBA1A_HUMAN,TBA1B_HUMAN	AYHEQLSVAEITNACFEPANQMVK	0.95
LAT3-S267-UV	S267-UV4 (F003712)	Tubulin alpha-1A chain OS=Homo sapiens OX=9606 GN=TUBA1A PE=1 SV=1	TBA1A_HUMAN,TBA1B_HUMAN	AFVHWYVGEGMEEGEFSEAREDMAALEKDYEEVGVDSVEGEGEEEGEEY	0.95
LAT3-S267-UV	S267-UV4 (F003712)	Tubulin alpha-1A chain OS=Homo sapiens OX=9606 GN=TUBA1A PE=1 SV=1	TBA1A_HUMAN,TBA1B_HUMAN	AVCMLSNTTAIAEAWAR	0.95
LAT3-S267-UV	S267-UV4 (F003712)	Tubulin alpha-1A chain OS=Homo sapiens OX=9606 GN=TUBA1A PE=1 SV=1	TBA1A_HUMAN,TBA1B_HUMAN	AYHEQLSVAEITNACFEPANQMVK	0.95
LAT3-S267-UV	S267-UV5 (F003713)	Tubulin alpha-1A chain OS=Homo sapiens OX=9606 GN=TUBA1A PE=1 SV=1	TBA1A_HUMAN,TBA1B_HUMAN	AVCMLSNTTAIAEAWAR	0.95
LAT3-S267-UV	S267-UV5 (F003713)	Tubulin alpha-1A chain OS=Homo sapiens OX=9606 GN=TUBA1A PE=1 SV=1	TBA1A_HUMAN,TBA1B_HUMAN	KLADQCTGLQGFLVFHSFGGGTGSGFTSLLMER	0.95
LAT3-S267+UV	S267+UV1 (F003704)	T-complex protein 1 subunit zeta OS=Homo sapiens OX=9606 GN=CCT6A PE=1 SV=3	TCPZ_HUMAN	VHAELADVLTEAVVDSILAIK	0.95
LAT3-S267+UV	S267+UV2 (F003705)	T-complex protein 1 subunit zeta OS=Homo sapiens OX=9606 GN=CCT6A PE=1 SV=3	TCPZ_HUMAN	VHAELADVLTEAVVDSILAIK	0.95
LAT3-S267+UV	S267+UV3 (F003706)	T-complex protein 1 subunit zeta OS=Homo sapiens OX=9606 GN=CCT6A PE=1 SV=3	TCPZ_HUMAN	AQAALAVNISAAR	0.95
LAT3-S267+UV	S267+UV3 (F003706)	T-complex protein 1 subunit zeta OS=Homo sapiens OX=9606 GN=CCT6A PE=1 SV=3	TCPZ_HUMAN	VHAELADVLTEAVVDSILAIK	0.95
LAT3-S267+UV	S267+UV4 (F003707)	T-complex protein 1 subunit zeta OS=Homo sapiens OX=9606 GN=CCT6A PE=1 SV=3	TCPZ_HUMAN	AQAALAVNISAAR	0.95
LAT3-S267+UV	S267+UV4 (F003707)	T-complex protein 1 subunit zeta OS=Homo sapiens OX=9606 GN=CCT6A PE=1 SV=3	TCPZ_HUMAN	VHAELADVLTEAVVDSILAIK	0.95
LAT3-S267+UV	S267+UV5 (F003708)	T-complex protein 1 subunit zeta OS=Homo sapiens OX=9606 GN=CCT6A PE=1 SV=3	TCPZ_HUMAN	VHAELADVLTEAVVDSILAIK	0.95
LAT3-S267-UV	S267-UV1 (F003709_1)	T-complex protein 1 subunit zeta OS=Homo sapiens OX=9606 GN=CCT6A PE=1 SV=3	TCPZ_HUMAN	VHAELADVLTEAVVDSILAIK	0.95
LAT3-S267-UV	S267-UV2 (F003710)	T-complex protein 1 subunit zeta OS=Homo sapiens OX=9606 GN=CCT6A PE=1 SV=3	TCPZ_HUMAN	AQAALAVNISAAR	0.95
LAT3-S267-UV	S267-UV2 (F003710)	T-complex protein 1 subunit zeta OS=Homo sapiens OX=9606 GN=CCT6A PE=1 SV=3	TCPZ_HUMAN	VHAELADVLTEAVVDSILAIK	0.95
LAT3-S267-UV	S267-UV3 (F003711)	T-complex protein 1 subunit zeta OS=Homo sapiens OX=9606 GN=CCT6A PE=1 SV=3	TCPZ_HUMAN	AQAALAVNISAAR	0.95
LAT3-S267-UV	S267-UV3 (F003711)	T-complex protein 1 subunit zeta OS=Homo sapiens OX=9606 GN=CCT6A PE=1 SV=3	TCPZ_HUMAN	VHAELADVLTEAVVDSILAIK	0.95
LAT3-S267-UV	S267-UV4 (F003712)	T-complex protein 1 subunit zeta OS=Homo sapiens OX=9606 GN=CCT6A PE=1 SV=3	TCPZ_HUMAN	VHAELADVLTEAVVDSILAIK	0.95
LAT3-S267-UV	S267-UV5 (F003713)	T-complex protein 1 subunit zeta OS=Homo sapiens OX=9606 GN=CCT6A PE=1 SV=3	TCPZ_HUMAN	AQAALAVNISAAR	0.95
LAT3-S267-UV	S267-UV5 (F003713)	T-complex protein 1 subunit zeta OS=Homo sapiens OX=9606 GN=CCT6A PE=1 SV=3	TCPZ_HUMAN	VHAELADVLTEAVVDSILAIK	0.95
LAT3-S267+UV	S267+UV1 (F003704)	Splicing factor U2AF 65 kDa subunit OS=Homo sapiens OX=9606 GN=U2AF2 PE=1 SV=4	U2AF2_HUMAN	LFIGGLPNYLNDDQVKELLTSFGPLK	0.95
LAT3-S267+UV	S267+UV2 (F003705)	Splicing factor U2AF 65 kDa subunit OS=Homo sapiens OX=9606 GN=U2AF2 PE=1 SV=4	U2AF2_HUMAN	LFIGGLPNYLNDDQVKELLTSFGPLK	0.95
LAT3-S267+UV	S267+UV3 (F003706)	Splicing factor U2AF 65 kDa subunit OS=Homo sapiens OX=9606 GN=U2AF2 PE=1 SV=4	U2AF2_HUMAN	LFIGGLPNYLNDDQVKELLTSFGPLK	0.95
LAT3-S267+UV	S267+UV4 (F003707)	Splicing factor U2AF 65 kDa subunit OS=Homo sapiens OX=9606 GN=U2AF2 PE=1 SV=4	U2AF2_HUMAN	LFIGGLPNYLNDDQVKELLTSFGPLK	0.95
LAT3-S267+UV	S267+UV5 (F003708)	Splicing factor U2AF 65 kDa subunit OS=Homo sapiens OX=9606 GN=U2AF2 PE=1 SV=4	U2AF2_HUMAN	LFIGGLPNYLNDDQVKELLTSFGPLK	0.95
LAT3-S267-UV	S267-UV1 (F003709_1)	Splicing factor U2AF 65 kDa subunit OS=Homo sapiens OX=9606 GN=U2AF2 PE=1 SV=4	U2AF2_HUMAN	LFIGGLPNYLNDDQVKELLTSFGPLK	0.95
LAT3-S267-UV	S267-UV2 (F003710)	Splicing factor U2AF 65 kDa subunit OS=Homo sapiens OX=9606 GN=U2AF2 PE=1 SV=4	U2AF2_HUMAN	LFIGGLPNYLNDDQVKELLTSFGPLK	0.95
LAT3-S267-UV	S267-UV3 (F003711)	Splicing factor U2AF 65 kDa subunit OS=Homo sapiens OX=9606 GN=U2AF2 PE=1 SV=4	U2AF2_HUMAN	LFIGGLPNYLNDDQVKELLTSFGPLK	0.95
LAT3-S267-UV	S267-UV4 (F003712)	Splicing factor U2AF 65 kDa subunit OS=Homo sapiens OX=9606 GN=U2AF2 PE=1 SV=4	U2AF2_HUMAN	LFIGGLPNYLNDDQVKELLTSFGPLK	0.95
LAT3-S267-UV	S267-UV5 (F003713)	Splicing factor U2AF 65 kDa subunit OS=Homo sapiens OX=9606 GN=U2AF2 PE=1 SV=4	U2AF2_HUMAN	LFIGGLPNYLNDDQVKELLTSFGPLK	0.95
LAT3-S267-UV	S267-UV5 (F003713)	Splicing factor U2AF 65 kDa subunit OS=Homo sapiens OX=9606 GN=U2AF2 PE=1 SV=4	U2AF2_HUMAN	RLYVGNIPFGITEEAMMDFFNAQMR	0.95
LAT3-S267+UV	S267+UV1 (F003704)	U5 small nuclear ribonucleoprotein 200 kDa helicase OS=Homo sapiens OX=9606 GN=SNRNP200 PE=1 SV=2	U520_HUMAN	CVYITPMEALAEQVYMDWYEKFQDRLNK	0.95
LAT3-S267+UV	S267+UV1 (F003704)	U5 small nuclear ribonucleoprotein 200 kDa helicase OS=Homo sapiens OX=9606 GN=SNRNP200 PE=1 SV=2	U520_HUMAN	ETRETYEVLLSFIQAALGDQPR	0.95
LAT3-S267+UV	S267+UV1 (F003704)	U5 small nuclear ribonucleoprotein 200 kDa helicase OS=Homo sapiens OX=9606 GN=SNRNP200 PE=1 SV=2	U520_HUMAN	ETYEVLLSFIQAALGDQPR	0.95
LAT3-S267+UV	S267+UV1 (F003704)	U5 small nuclear ribonucleoprotein 200 kDa helicase OS=Homo sapiens OX=9606 GN=SNRNP200 PE=1 SV=2	U520_HUMAN	NSAFESLYQDKFPFFNPIQTQVFNTVYNSDDNVFVGAPTGSGK	0.95
LAT3-S267+UV	S267+UV1 (F003704)	U5 small nuclear ribonucleoprotein 200 kDa helicase OS=Homo sapiens OX=9606 GN=SNRNP200 PE=1 SV=2	U520_HUMAN	QVLDLEDLVFTQGSHF	0.95
LAT3-S267+UV	S267+UV2 (F003705)	U5 small nuclear ribonucleoprotein 200 kDa helicase OS=Homo sapiens OX=9606 GN=SNRNP200 PE=1 SV=2	U520_HUMAN	CVYITPMEALAEQVYMDWYEKFQDRLNK	0.95
LAT3-S267+UV	S267+UV2 (F003705)	U5 small nuclear ribonucleoprotein 200 kDa helicase OS=Homo sapiens OX=9606 GN=SNRNP200 PE=1 SV=2	U520_HUMAN	ETYEVLLSFIQAALGDQPR	0.95
LAT3-S267+UV	S267+UV2 (F003705)	U5 small nuclear ribonucleoprotein 200 kDa helicase OS=Homo sapiens OX=9606 GN=SNRNP200 PE=1 SV=2	U520_HUMAN	FCNRYPNIELSYEVVDKDSIR	0.95
LAT3-S267+UV	S267+UV2 (F003705)	U5 small nuclear ribonucleoprotein 200 kDa helicase OS=Homo sapiens OX=9606 GN=SNRNP200 PE=1 SV=2	U520_HUMAN	QVLDLEDLVFTQGSHF	0.95
LAT3-S267+UV	S267+UV3 (F003706)	U5 small nuclear ribonucleoprotein 200 kDa helicase OS=Homo sapiens OX=9606 GN=SNRNP200 PE=1 SV=2	U520_HUMAN	ETYEVLLSFIQAALGDQPR	0.95
LAT3-S267+UV	S267+UV3 (F003706)	U5 small nuclear ribonucleoprotein 200 kDa helicase OS=Homo sapiens OX=9606 GN=SNRNP200 PE=1 SV=2	U520_HUMAN	FCNRYPNIELSYEVVDKDSIR	0.95
LAT3-S267+UV	S267+UV4 (F003707)	U5 small nuclear ribonucleoprotein 200 kDa helicase OS=Homo sapiens OX=9606 GN=SNRNP200 PE=1 SV=2	U520_HUMAN	CVYITPMEALAEQVYMDWYEKFQDRLNK	0.95
LAT3-S267+UV	S267+UV4 (F003707)	U5 small nuclear ribonucleoprotein 200 kDa helicase OS=Homo sapiens OX=9606 GN=SNRNP200 PE=1 SV=2	U520_HUMAN	ETRETYEVLLSFIQAALGDQPR	0.95
LAT3-S267+UV	S267+UV4 (F003707)	U5 small nuclear ribonucleoprotein 200 kDa helicase OS=Homo sapiens OX=9606 GN=SNRNP200 PE=1 SV=2	U520_HUMAN	ETYEVLLSFIQAALGDQPR	0.95
LAT3-S267+UV	S267+UV4 (F003707)	U5 small nuclear ribonucleoprotein 200 kDa helicase OS=Homo sapiens OX=9606 GN=SNRNP200 PE=1 SV=2	U520_HUMAN	FCNRYPNIELSYEVVDKDSIR	0.95
LAT3-S267+UV	S267+UV4 (F003707)	U5 small nuclear ribonucleoprotein 200 kDa helicase OS=Homo sapiens OX=9606 GN=SNRNP200 PE=1 SV=2	U520_HUMAN	YAQDEHLITFFVPVFEPLPPQYFIR	0.95
LAT3-S267+UV	S267+UV5 (F003708)	U5 small nuclear ribonucleoprotein 200 kDa helicase OS=Homo sapiens OX=9606 GN=SNRNP200 PE=1 SV=2	U520_HUMAN	CVYITPMEALAEQVYMDWYEKFQDRLNK	0.95
LAT3-S267+UV	S267+UV5 (F003708)	U5 small nuclear ribonucleoprotein 200 kDa helicase OS=Homo sapiens OX=9606 GN=SNRNP200 PE=1 SV=2	U520_HUMAN	ETYEVLLSFIQAALGDQPR	0.95
LAT3-S267-UV	S267-UV2 (F003710)	U5 small nuclear ribonucleoprotein 200 kDa helicase OS=Homo sapiens OX=9606 GN=SNRNP200 PE=1 SV=2	U520_HUMAN	ETYEVLLSFIQAALGDQPR	0.95
LAT3-S267-UV	S267-UV3 (F003711)	U5 small nuclear ribonucleoprotein 200 kDa helicase OS=Homo sapiens OX=9606 GN=SNRNP200 PE=1 SV=2	U520_HUMAN	ETYEVLLSFIQAALGDQPR	0.95
LAT3-S267-UV	S267-UV4 (F003712)	U5 small nuclear ribonucleoprotein 200 kDa helicase OS=Homo sapiens OX=9606 GN=SNRNP200 PE=1 SV=2	U520_HUMAN	ETYEVLLSFIQAALGDQPR	0.95
LAT3-S267-UV	S267-UV4 (F003712)	U5 small nuclear ribonucleoprotein 200 kDa helicase OS=Homo sapiens OX=9606 GN=SNRNP200 PE=1 SV=2	U520_HUMAN	QVLDLEDLVFTQGSHF	0.95
LAT3-S267-UV	S267-UV5 (F003713)	U5 small nuclear ribonucleoprotein 200 kDa helicase OS=Homo sapiens OX=9606 GN=SNRNP200 PE=1 SV=2	U520_HUMAN	ETYEVLLSFIQAALGDQPR	0.95
LAT3-S267+UV	S267+UV1 (F003704)	116 kDa U5 small nuclear ribonucleoprotein component OS=Homo sapiens OX=9606 GN=EFTUD2 PE=1 SV=1	U5S1_HUMAN	ISDGVVLFIDAAEGVMLNTER	0.95
LAT3-S267+UV	S267+UV1 (F003704)	116 kDa U5 small nuclear ribonucleoprotein component OS=Homo sapiens OX=9606 GN=EFTUD2 PE=1 SV=1	U5S1_HUMAN	SYLFNIMDTPGHVNFSDEVTAGLR	0.95
LAT3-S267+UV	S267+UV2 (F003705)	116 kDa U5 small nuclear ribonucleoprotein component OS=Homo sapiens OX=9606 GN=EFTUD2 PE=1 SV=1	U5S1_HUMAN	ISDGVVLFIDAAEGVMLNTER	0.95
LAT3-S267+UV	S267+UV2 (F003705)	116 kDa U5 small nuclear ribonucleoprotein component OS=Homo sapiens OX=9606 GN=EFTUD2 PE=1 SV=1	U5S1_HUMAN	SIWAFGPDATGPNILVDDTLPSEVDKALLGSVK	0.95
LAT3-S267+UV	S267+UV2 (F003705)	116 kDa U5 small nuclear ribonucleoprotein component OS=Homo sapiens OX=9606 GN=EFTUD2 PE=1 SV=1	U5S1_HUMAN	VADPVVTFCETVVETSSLK	0.95
LAT3-S267+UV	S267+UV3 (F003706)	116 kDa U5 small nuclear ribonucleoprotein component OS=Homo sapiens OX=9606 GN=EFTUD2 PE=1 SV=1	U5S1_HUMAN	ISDGVVLFIDAAEGVMLNTER	0.95
LAT3-S267+UV	S267+UV3 (F003706)	116 kDa U5 small nuclear ribonucleoprotein component OS=Homo sapiens OX=9606 GN=EFTUD2 PE=1 SV=1	U5S1_HUMAN	KFTLMEQTLPVTVYEMDFLADLMDNSELIR	0.95
LAT3-S267+UV	S267+UV3 (F003706)	116 kDa U5 small nuclear ribonucleoprotein component OS=Homo sapiens OX=9606 GN=EFTUD2 PE=1 SV=1	U5S1_HUMAN	SYLFNIMDTPGHVNFSDEVTAGLR	0.95
LAT3-S267+UV	S267+UV4 (F003707)	116 kDa U5 small nuclear ribonucleoprotein component OS=Homo sapiens OX=9606 GN=EFTUD2 PE=1 SV=1	U5S1_HUMAN	ISDGVVLFIDAAEGVMLNTER	0.95
LAT3-S267+UV	S267+UV4 (F003707)	116 kDa U5 small nuclear ribonucleoprotein component OS=Homo sapiens OX=9606 GN=EFTUD2 PE=1 SV=1	U5S1_HUMAN	SIWAFGPDATGPNILVDDTLPSEVDKALLGSVK	0.95
LAT3-S267+UV	S267+UV4 (F003707)	116 kDa U5 small nuclear ribonucleoprotein component OS=Homo sapiens OX=9606 GN=EFTUD2 PE=1 SV=1	U5S1_HUMAN	SYLFNIMDTPGHVNFSDEVTAGLR	0.95
LAT3-S267+UV	S267+UV5 (F003708)	116 kDa U5 small nuclear ribonucleoprotein component OS=Homo sapiens OX=9606 GN=EFTUD2 PE=1 SV=1	U5S1_HUMAN	ISDGVVLFIDAAEGVMLNTER	0.95
LAT3-S267+UV	S267+UV5 (F003708)	116 kDa U5 small nuclear ribonucleoprotein component OS=Homo sapiens OX=9606 GN=EFTUD2 PE=1 SV=1	U5S1_HUMAN	KFTLMEQTLPVTVYEMDFLADLMDNSELIR	0.95
LAT3-S267+UV	S267+UV5 (F003708)	116 kDa U5 small nuclear ribonucleoprotein component OS=Homo sapiens OX=9606 GN=EFTUD2 PE=1 SV=1	U5S1_HUMAN	SIWAFGPDATGPNILVDDTLPSEVDKALLGSVK	0.95
LAT3-S267-UV	S267-UV3 (F003711)	116 kDa U5 small nuclear ribonucleoprotein component OS=Homo sapiens OX=9606 GN=EFTUD2 PE=1 SV=1	U5S1_HUMAN	ISDGVVLFIDAAEGVMLNTER	0.95
LAT3-S267-UV	S267-UV4 (F003712)	116 kDa U5 small nuclear ribonucleoprotein component OS=Homo sapiens OX=9606 GN=EFTUD2 PE=1 SV=1	U5S1_HUMAN	ISDGVVLFIDAAEGVMLNTER	0.95
LAT3-S267-UV	S267-UV4 (F003712)	116 kDa U5 small nuclear ribonucleoprotein component OS=Homo sapiens OX=9606 GN=EFTUD2 PE=1 SV=1	U5S1_HUMAN	KFTLMEQTLPVTVYEMDFLADLMDNSELIR	0.95
LAT3-S267+UV	S267+UV1 (F003704)	Vimentin OS=Homo sapiens OX=9606 GN=VIM PE=1 SV=4	VIME_HUMAN	LLQDSVDFSLADAINTEFKNTR	0.95
LAT3-S267+UV	S267+UV3 (F003706)	Vimentin OS=Homo sapiens OX=9606 GN=VIM PE=1 SV=4	VIME_HUMAN	LHEEEIQELQAQIQEQHVQIDVDVSKPDLTAALR	0.95
LAT3-S267+UV	S267+UV3 (F003706)	Vimentin OS=Homo sapiens OX=9606 GN=VIM PE=1 SV=4	VIME_HUMAN	LLQDSVDFSLADAINTEFKNTR	0.95
LAT3-S267+UV	S267+UV4 (F003707)	Vimentin OS=Homo sapiens OX=9606 GN=VIM PE=1 SV=4	VIME_HUMAN	LLQDSVDFSLADAINTEFKNTR	0.95
LAT3-S267-UV	S267-UV2 (F003710)	Vimentin OS=Homo sapiens OX=9606 GN=VIM PE=1 SV=4	VIME_HUMAN	LLQDSVDFSLADAINTEFKNTR	0.95
LAT3-S267-UV	S267-UV3 (F003711)	Vimentin OS=Homo sapiens OX=9606 GN=VIM PE=1 SV=4	VIME_HUMAN	LLQDSVDFSLADAINTEFKNTR	0.95
LAT3-S267-UV	S267-UV5 (F003713)	Vimentin OS=Homo sapiens OX=9606 GN=VIM PE=1 SV=4	VIME_HUMAN	LLQDSVDFSLADAINTEFKNTR	0.95
LAT3-S267+UV	S267+UV1 (F003704)	X-ray repair cross-complementing protein 5 OS=Homo sapiens OX=9606 GN=XRCC5 PE=1 SV=3	XRCC5_HUMAN	ASFEEASNQLINHIEQFLDTNETPYFMK	0.95
LAT3-S267+UV	S267+UV1 (F003704)	X-ray repair cross-complementing protein 5 OS=Homo sapiens OX=9606 GN=XRCC5 PE=1 SV=3	XRCC5_HUMAN	QVFAENKDEIALVLFGTDGTDNPLSGGDQYQNITVHR	0.95
LAT3-S267+UV	S267+UV1 (F003704)	X-ray repair cross-complementing protein 5 OS=Homo sapiens OX=9606 GN=XRCC5 PE=1 SV=3	XRCC5_HUMAN	VFAARDDEAAAVALSSLIHALDDLDMVAIVR	0.95
LAT3-S267+UV	S267+UV2 (F003705)	X-ray repair cross-complementing protein 5 OS=Homo sapiens OX=9606 GN=XRCC5 PE=1 SV=3	XRCC5_HUMAN	ASFEEASNQLINHIEQFLDTNETPYFMK	0.95
LAT3-S267+UV	S267+UV2 (F003705)	X-ray repair cross-complementing protein 5 OS=Homo sapiens OX=9606 GN=XRCC5 PE=1 SV=3	XRCC5_HUMAN	QVFAENKDEIALVLFGTDGTDNPLSGGDQYQNITVHR	0.95
LAT3-S267+UV	S267+UV2 (F003705)	X-ray repair cross-complementing protein 5 OS=Homo sapiens OX=9606 GN=XRCC5 PE=1 SV=3	XRCC5_HUMAN	VFAARDDEAAAVALSSLIHALDDLDMVAIVR	0.95
LAT3-S267+UV	S267+UV3 (F003706)	X-ray repair cross-complementing protein 5 OS=Homo sapiens OX=9606 GN=XRCC5 PE=1 SV=3	XRCC5_HUMAN	VFAARDDEAAAVALSSLIHALDDLDMVAIVR	0.95
LAT3-S267+UV	S267+UV4 (F003707)	X-ray repair cross-complementing protein 5 OS=Homo sapiens OX=9606 GN=XRCC5 PE=1 SV=3	XRCC5_HUMAN	QVFAENKDEIALVLFGTDGTDNPLSGGDQYQNITVHR	0.95
LAT3-S267-UV	S267-UV1 (F003709_1)	X-ray repair cross-complementing protein 5 OS=Homo sapiens OX=9606 GN=XRCC5 PE=1 SV=3	XRCC5_HUMAN	QVFAENKDEIALVLFGTDGTDNPLSGGDQYQNITVHR	0.95
LAT3-S267-UV	S267-UV2 (F003710)	X-ray repair cross-complementing protein 5 OS=Homo sapiens OX=9606 GN=XRCC5 PE=1 SV=3	XRCC5_HUMAN	IQPGSQQADFLDALIVSMDVIQHETIGK	0.95
LAT3-S267-UV	S267-UV2 (F003710)	X-ray repair cross-complementing protein 5 OS=Homo sapiens OX=9606 GN=XRCC5 PE=1 SV=3	XRCC5_HUMAN	QVFAENKDEIALVLFGTDGTDNPLSGGDQYQNITVHR	0.95
LAT3-S267-UV	S267-UV2 (F003710)	X-ray repair cross-complementing protein 5 OS=Homo sapiens OX=9606 GN=XRCC5 PE=1 SV=3	XRCC5_HUMAN	VFAARDDEAAAVALSSLIHALDDLDMVAIVR	0.95
LAT3-S267-UV	S267-UV3 (F003711)	X-ray repair cross-complementing protein 5 OS=Homo sapiens OX=9606 GN=XRCC5 PE=1 SV=3	XRCC5_HUMAN	ASFEEASNQLINHIEQFLDTNETPYFMK	0.95
LAT3-S267-UV	S267-UV3 (F003711)	X-ray repair cross-complementing protein 5 OS=Homo sapiens OX=9606 GN=XRCC5 PE=1 SV=3	XRCC5_HUMAN	VFAARDDEAAAVALSSLIHALDDLDMVAIVR	0.95
LAT3-S267-UV	S267-UV4 (F003712)	X-ray repair cross-complementing protein 5 OS=Homo sapiens OX=9606 GN=XRCC5 PE=1 SV=3	XRCC5_HUMAN	QVFAENKDEIALVLFGTDGTDNPLSGGDQYQNITVHR	0.95
LAT3-S267-UV	S267-UV4 (F003712)	X-ray repair cross-complementing protein 5 OS=Homo sapiens OX=9606 GN=XRCC5 PE=1 SV=3	XRCC5_HUMAN	VFAARDDEAAAVALSSLIHALDDLDMVAIVR	0.95
LAT3-S267-UV	S267-UV5 (F003713)	X-ray repair cross-complementing protein 5 OS=Homo sapiens OX=9606 GN=XRCC5 PE=1 SV=3	XRCC5_HUMAN	IQPGSQQADFLDALIVSMDVIQHETIGK	0.95
LAT3-S267-UV	S267-UV5 (F003713)	X-ray repair cross-complementing protein 5 OS=Homo sapiens OX=9606 GN=XRCC5 PE=1 SV=3	XRCC5_HUMAN	TEQGGAHFSVSSLAEGSVTSVGSVNPAENFR	0.95
LAT3-S267-UV	S267-UV5 (F003713)	X-ray repair cross-complementing protein 5 OS=Homo sapiens OX=9606 GN=XRCC5 PE=1 SV=3	XRCC5_HUMAN	VFAARDDEAAAVALSSLIHALDDLDMVAIVR	0.95
LAT3-S267+UV	S267+UV4 (F003707)	X-ray repair cross-complementing protein 6 OS=Homo sapiens OX=9606 GN=XRCC6 PE=1 SV=2	XRCC6_HUMAN	NLEALALDLMEPEQAVDLTLPK	0.95
LAT3-S267-UV	S267-UV3 (F003711)	X-ray repair cross-complementing protein 6 OS=Homo sapiens OX=9606 GN=XRCC6 PE=1 SV=2	XRCC6_HUMAN	NLEALALDLMEPEQAVDLTLPK	0.95
LAT3-S267-UV	S267-UV5 (F003713)	X-ray repair cross-complementing protein 6 OS=Homo sapiens OX=9606 GN=XRCC6 PE=1 SV=2	XRCC6_HUMAN	NIPPYFVALVPQEEELDDQKIQVTPPGFQLVFLPFADDKR	0.95
LAT3-S267-UV	S267-UV5 (F003713)	X-ray repair cross-complementing protein 6 OS=Homo sapiens OX=9606 GN=XRCC6 PE=1 SV=2	XRCC6_HUMAN	NLEALALDLMEPEQAVDLTLPK	0.95
LAT3-S267+UV	S267+UV1 (F003704)	YLP motif-containing protein 1 OS=Homo sapiens OX=9606 GN=YLPM1 PE=1 SV=4	YLPM1_HUMAN	TLDDGFFPFIILDAINDR	0.95
LAT3-S267+UV	S267+UV2 (F003705)	YLP motif-containing protein 1 OS=Homo sapiens OX=9606 GN=YLPM1 PE=1 SV=4	YLPM1_HUMAN	TLDDGFFPFIILDAINDR	0.95
LAT3-S267+UV	S267+UV3 (F003706)	YLP motif-containing protein 1 OS=Homo sapiens OX=9606 GN=YLPM1 PE=1 SV=4	YLPM1_HUMAN	TLDDGFFPFIILDAINDR	0.95
LAT3-S267+UV	S267+UV4 (F003707)	YLP motif-containing protein 1 OS=Homo sapiens OX=9606 GN=YLPM1 PE=1 SV=4	YLPM1_HUMAN	DIPSLPPLPPLPPLPPLDR	0.95
LAT3-S267+UV	S267+UV4 (F003707)	YLP motif-containing protein 1 OS=Homo sapiens OX=9606 GN=YLPM1 PE=1 SV=4	YLPM1_HUMAN	TLDDGFFPFIILDAINDR	0.95
LAT3-S267+UV	S267+UV5 (F003708)	YLP motif-containing protein 1 OS=Homo sapiens OX=9606 GN=YLPM1 PE=1 SV=4	YLPM1_HUMAN	DIPSLPPLPPLPPLPPLDR	0.95
